# Supplementary material for: Open-air oxidative Mizoroki–Heck reaction of arylsulfonyl hydrazides with alkenes
Source: Royal Society of Chemistry journal article supplement (doi:10.1039/c6ra03188a), 2016-01-01
Supplement: c6ra03188a1.pdf [file c6ra03188a1.pdf]

## Supporting Information

### Open-Air Oxidative Mizoroki-Heck Reaction of Arylsulfonyl hydrazides with Alkenes

On Ying Yuen, Chau Ming So\*, and Fuk Yee Kwong\*

*State Key Laboratory of Chiroscience and Department of Applied Biology and Chemical Technology, The Hong Kong Polytechnic University, Hung Hom, Hong Kong*

*E-mail:* [chau.ming.so@polyu.edu.hk](mailto:chau.ming.so@polyu.edu.hk) and [fuk-yee.kwong@polyu.edu.hk](mailto:fuk-yee.kwong@polyu.edu.hk)

### Table of Content

|                                                                                                                                   |    |
|-----------------------------------------------------------------------------------------------------------------------------------|----|
| 1. General considerations .....                                                                                                   | 2  |
| 2. General procedure for the preparation of phenyl isonicotinate (L9).....                                                        | 3  |
| 3. General procedure for the reaction condition screening without pyridine ligand .....                                           | 4  |
| 4. General procedure for the reaction condition screening with pyridine ligand...                                                 | 4  |
| 5. General procedure for the oxidative Heck reaction of arylsulfonyl hydrazides with alkenes.....                                 | 5  |
| 6. General procedure for the kinetic study of the oxidative Heck reaction of 4-methylbenzenesulfonyl hydrazide with styrene. .... | 6  |
| 7. Characterization data of coupling products.....                                                                                | 7  |
| 8. <sup>1</sup> H, <sup>13</sup> C, <sup>19</sup> F, HRMS and IR spectra.....                                                     | 19 |
| 9. References .....                                                                                                               | 75 |

## 1. General considerations

Unless otherwise noted, all reagents were purchased from commercial suppliers and used without purification. All oxidative heck reactions were performed in an open vessel. A vial (approx. 40 mL volume) fitted with an air condenser as cooler was in the presence of Telfon coated magnetic stirrer bar (4 mm x 10 mm). All arylsulfonyl hydrazides except trimethylbenzenesulfonohydrazide were synthesized according to the literatutre report.<sup>1</sup> Phenyl isonicotinate was produced by the following procedures. Thin layer chromatography was performed on Merck precoated silica gel 60 F<sub>254</sub> plates. Silica gel (Merck, 70-230 and 230-400 mesh) was used for column chromatography. Melting points were recorded on an uncorrected Büchi Melting Point B-545 instrument. NMR spectra were recorded on a Brüker spectrometer (400 MHz for <sup>1</sup>H, 100 MHz for <sup>13</sup>C and 376 MHz for <sup>19</sup>F). Spectra were referenced internally to the residual proton resonance in CDCl<sub>3</sub> (δ 7.26 ppm), or with tetramethylsilane (TMS, δ 0.00 ppm) as the internal standard. Chemical shifts (δ) were reported as part per million (ppm) in δ scale downfield from TMS. <sup>13</sup>C NMR spectra were referenced to CDCl<sub>3</sub> (δ 77.0 ppm, the middle peak). <sup>19</sup>F NMR chemical shifts were determined relative to CFC<sub>3</sub> as the external standard and low field is positive. Coupling constants (*J*) were reported in Hertz (Hz). Mass spectra (EI-MS and ES-MS) were recorded on a HP 5989B Mass Spectrometer. High-resolution mass spectra (HRMS) were obtained on a Brüker APEX 47e FTICR mass spectrometer (ESI-MS). GC-MS analysis was conducted on a HP 5973 GCD system using a HP5MS column (30 m × 0.25 mm). The products described in GC yield were accorded to the authentic samples/dodecane calibration standard from HP 6890 GC-FID system. All yields reported refer to isolated yield of compounds estimated to be greater than 95% purity as determined by capillary gas

chromatography (GC) or  $^1\text{H}$  NMR. Compounds described in the literature were characterized by comparison of their  $^1\text{H}$ ,  $^{13}\text{C}$  and/or  $^{19}\text{F}$  NMR spectra to the previously reported data. The procedures in this section are representative, and thus the yields may differ from those reported in tables.

## 2. General procedure for the preparation of phenyl isonicotinate (L9)

### Phenyl isonicotinate (L9)<sup>2</sup>

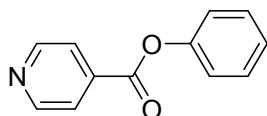

Thionyl chloride (5.95 g, 50 mmol) was added dropwise to isonicotinic acid (6.15 g, 50 mmol) and triethylamine (5.05 g, 50 mmol) in chloroform (200 mL). The mixture was refluxed for 2 h and cooled down to room temperature. Then a THF solution of sodium phenoxide (Sodium hydride (4.80 g, 60% in mineral oil, 120 mmol, 1.2 equiv.) was suspended in THF (100 mL) under nitrogen and cooled to 0°C in an ice bath. Phenol (8.78 mL, 100 mmol) was added dropwise to the THF solution and stirred for 1 h.) was added dropwise to the resulting isonicotinyl chloride solution, cooled by salt and ice water. The solution was further refluxed for 2 h, and then water (100 mL) and ethyl acetate (200 mL) was added. The organic layer was successively washed with 1M sodium hydroxide solution and then washed with saturated brine solution. The organic layer was concentrated under vacuum and pass through a calica pad (5 x 3 cm) (Eluents = EtOAc: Hexane = 1: 9). The organic layer was concentrated. A white solid was obtained and then further washed with small amount of cool hexane and dry under vacuum. 4.2 g (42% yield) product yield of phenyl isonicotinate was obtained.  $^1\text{H}$  NMR (400 MHz,  $\text{CDCl}_3$ )  $\delta$  7.21-7.23 (m, 2H), 7.26-7.32 (m, 1H), 7.42-7.47 (m, 2H), 7.99-8.00 (m, 2H), 8.84-8.86 (m, 2H);  $^{13}\text{C}$

NMR (100 MHz, CDCl<sub>3</sub>)  $\delta$  121.3, 123.1, 126.3, 129.6, 136.8, 150.4, 150.8, 163.4; MS (EI): *m/z* (relative intensity) 199.0 (M<sup>+</sup>, 37), 106.0 (100), 78.0 (50), 65.0 (7), 51.0 (24).

### **3. General procedure for the reaction condition screening without pyridine ligand**

All reagents were weighted in air and the reactions were performed in an open vessel. Palladium source (0.03 mmol), 4-methylbenzenesulfonyl hydrazide (0.0838 g, 0.45 mmol) and styrene (34.4  $\mu$ L, 0.3 mmol) were loaded into a 40 mL vial equipped with a Teflon-coated magnetic stir bar. The solvent (3 mL) was added at room temperature. The vial was fitted with an air condenser as cooler and then placed into a preheated oil bath (90 °C) and vigorously stirred for 16 h. After the completion of reaction, the reaction vial was allowed to cool at room temperature. Ethyl acetate (~10 mL) and dodecane (68.4  $\mu$ L, internal standard) were added. The organic layer was subjected to GC analysis. The GC yield obtained was previously calibrated by authentic sample/dodecane calibration curve.

### **4. General procedure for the reaction condition screening with pyridine ligand**

All reagents were weighted in air and the reactions were performed in an open vessel. Pd(OAc)<sub>2</sub> (0.0068 g, 0.03 mmol) and pyridine ligand (Pd:L = 1:2) were loaded into a 40 mL vial equipped with a Teflon-coated magnetic stir bar. Precomplexation was applied by adding DMF (1 mL) in to the vial. The palladium complex stock solution was stirred for 10 minutes. 4-methylbenzenesulfonyl hydrazide (0.0838 g, 0.45 mmol) and styrene (34.4  $\mu$ L, 0.3 mmol) were loaded into the vial. DMF (2 mL) was added with continuous stirring at room temperature. The vial was fitted with an air condenser as cooler and then placed into a preheated oil bath which the temperature was indicated in the table and vigorously stirred for 16 h.

After the completion of reaction, the reaction vial was allowed to cool at room temperature. Ethyl acetate (~10 mL) and dodecane (68.4  $\mu$ L, internal standard) were added. The organic layer was subjected to GC analysis. The GC yield obtained was previously calibrated by authentic sample/dodecane calibration curve.

## **5. General procedure for the oxidative Heck reaction of arylsulfonyl hydrazides with alkenes**

All reagents were weighted in air and the reactions were performed in an open vessel.  $\text{Pd}(\text{OAc})_2$  (0.0068 g, 0.03 mmol) and phenyl isonicotinate ( $\text{Pd:L} = 1:2$ ) were loaded into a 40 mL vial equipped with a Teflon-coated magnetic stir bar. Precomplexation was applied by adding DMF (1 mL) in to the vial. The palladium complex stock solution was stirred for 10 minutes. Arylsulfonyl hydrazide (0.45 mmol) and alkenes (0.3 mmol) were loaded into the vial. DMF (2 mL) was added with continuous stirring at room temperature. The vial was fitted with an air condenser as cooler and then placed into a preheated oil bath which the temperature was indicated in the table and vigorously stirred for 16 h. After the completion of reaction, the reaction vial was allowed to cool at room temperature. Ethyl acetate (~10 mL) was added. The organic layer was subjected to GC analysis. After analyzing GC spectra, the crude product in the organic layer was extracted and the vial washed with ethyl acetate. The filtrate was concentrated under reduced pressure. The crude product was purified by flash column chromatography on silica gel (230 - 400 mesh) to afford the desired product.

## 6. General procedure for the kinetic study of the oxidative Heck reaction of 4-methylbenzenesulfonyl hydrazide with styrene.

*For the reaction with pyridine ligand L9*, Pd(OAc)<sub>2</sub> (0.0068 g, 0.03 mmol) and phenyl isonicotinate (Pd:L = 1:2) were loaded into a 25 mL reaction tube (tube A) with a narrow opening (4 mm) equipped with a Teflon-coated magnetic stir bar (3 x 8 mm). DMF (1 mL) was added to the reaction tube and the mixture was stirred for 10 minutes. During that time, *for the reaction without pyridine ligand L9*, Pd(OAc)<sub>2</sub> (0.0068 g, 0.03 mmol), 4-methylbenzenesulfonyl hydrazide (0.0838 g, 0.45 mmol), styrene (34.4 µL, 0.3 mmol), and 1,4-dimethoxybenzene (internal standard, 0.0414 g, 0.3 mmol) were loaded into another 25 mL reaction tube (tube B) with a narrow opening (4 mm) equipped with a Teflon-coated magnetic stir bar (3 x 8 mm). After 10 minutes, 4-methylbenzenesulfonyl hydrazide (0.0838 g, 0.45 mmol), styrene (34.4 µL, 0.3 mmol), 1,4-dimethoxybenzene (internal standard, 0.0414 g, 0.3 mmol) and additional DMF (2 mL) were added into tube A meanwhile DMF (3 mL) was added to tube B. Tube A and B were allowed to stir at room temperature for 1 min. The tubes were then placed into a preheated oil bath (90 °C) with vigorous stirring. For the reaction time (data points) indicated in the Scheme 2, reaction mixtures (0.05 mL) in each reaction tube were taken up, diluted with ethyl acetate (0.5 mL) and then subjected to GC analysis. The GC yield obtained was previously calibrated by authentic sample/1,4-dimethoxybenzene calibration curve.

## 7. Characterization data of coupling products

### Benzene, 1-methyl-4-[(1*E*)-2-phenylethenyl]- (Table 3, compound 3ak)<sup>3</sup>

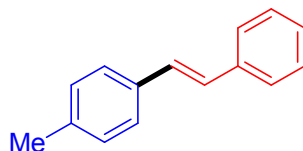

Eluents (Hexane,  $R_f = 0.56$ ) was used for flash column chromatography. White solid,  $^1\text{H}$  NMR (400 MHz,  $\text{CDCl}_3$ )  $\delta$  2.45 (s, 3H), 7.12-7.21 (m, 2H), 7.26 (d,  $J = 8.0$  Hz, 2H), 7.31-7.36 (m, 1H), 7.44 (t,  $J = 6.8$  Hz, 2H), 7.51 (d,  $J = 8.0$  Hz, 2H), 7.59 (d,  $J = 7.6$  Hz, 2H);  $^{13}\text{C}$  NMR (100 MHz,  $\text{CDCl}_3$ )  $\delta$  21.2, 126.4, 127.4, 127.7, 128.6, 129.4, 134.5, 137.5; MS (EI):  $m/z$  (relative intensity) 194.1 ( $\text{M}^+$ , 96), 179.0 (100), 165.0 (12), 152.0 (9), 115.0 (11).

### Benzene, 1-methyl-2-[(1*E*)-2-phenylethenyl]- (Table 3, compound 3bk)<sup>4</sup>

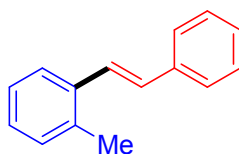

Eluents (Hexane,  $R_f = 0.56$ ) was used for flash column chromatography. White solid,  $^1\text{H}$  NMR (400 MHz,  $\text{CDCl}_3$ )  $\delta$  2.52 (s, 3H), 7.07-7.11 (d,  $J = 16$  Hz, 1H), 7.26-7.38 (m, 4H), 7.41-7.47 (m, 3H), 7.61 (d,  $J = 8.0$  Hz, 2H), 7.69 (d,  $J = 6.8$  Hz, 1H);  $^{13}\text{C}$  NMR (100 MHz,  $\text{CDCl}_3$ )  $\delta$  19.9, 125.3, 126.2, 126.5, 127.5, 128.6, 130.0, 130.4, 135.8, 136.4, 137.6; MS (EI):  $m/z$  (relative intensity) 194.1 ( $\text{M}^+$ , 79), 179.0 (100), 165.0 (13), 152.0 (8), 115.0 (22).

**Naphthalene, 2-[(1*E*)-2-phenylethenyl]- (Table 3, compound 3ck)<sup>3</sup>**

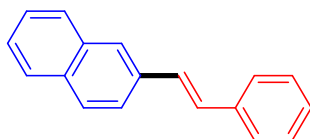

Eluents (Hexane,  $R_f$  = 0.38) was used for flash column chromatography. White solid,  $^1\text{H}$  NMR (400 MHz,  $\text{CDCl}_3$ )  $\delta$  7.25-7.35 (m, 3H), 7.41-7.45 (m, 2H), 7.47-7.56 (m, 2H), 7.60-7.62 (m, 2H), 7.77-7.80 (m, 1H), 7.85-7.89 (m, 4H);  $^{13}\text{C}$  NMR (100 MHz,  $\text{CDCl}_3$ )  $\delta$  14.2, 21.0, 29.7, 60.4, 123.5, 125.9, 126.3, 126.6, 127.7, 128.0, 128.3, 128.7, 129.0, 171.1; MS (EI):  $m/z$  (relative intensity) 230.1 ( $\text{M}^+$ , 100), 215.0 (23), 202.0 (11), 114.1 (3), 101.0 (9)

**Benzene, 1,1'-(1*E*)-1,2-ethenediylbis- (Table 3, compound 3dk)<sup>3</sup>**

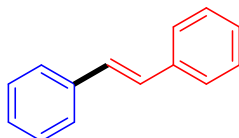

Eluents (Hexane,  $R_f$  = 0.50) was used for flash column chromatography. White solid,  $^1\text{H}$  NMR (400 MHz,  $\text{CDCl}_3$ )  $\delta$  7.18 (s, 2H), 7.30-7.34 (m, 2H), 7.40-7.44 (m, 4H), 7.57-7.59 (m, 4H);  $^{13}\text{C}$  NMR (100 MHz,  $\text{CDCl}_3$ )  $\delta$  126.4, 127.5, 128.6, 137.3; MS (EI):  $m/z$  (relative intensity) 180.0 ( $\text{M}^+$ , 100), 165.0 (49), 152.0 (13), 89.0 (27), 76.0 (20), 51.0 (19).

**Benzene, 1-fluoro-4-[(1*E*)-2-phenylethenyl]- (Table 3, compound 3ek)<sup>3</sup>**

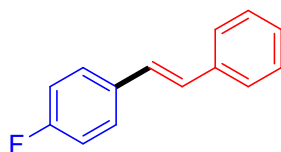

Eluents (Hexane,  $R_f = 0.44$ ) was used for flash column chromatography. White solid,  $^1\text{H}$  NMR (400 MHz,  $\text{CDCl}_3$ )  $\delta$  7.04-7.14 (m, 4H), 7.28-7.33 (m, 1H), 7.39-7.43 (m, 2H), 7.49-7.55 (m, 4H);  $^{13}\text{C}$  NMR (100 MHz,  $\text{CDCl}_3$ )  $\delta$  115.5, 115.7, 126.4, 127.4, 127.6, 127.9, 128.4, 133.5, 137.1, 161.1, 163.5;  $^{19}\text{F}$  NMR (400 MHz,  $\text{CDCl}_3$ )  $\delta$  -114.2; MS (EI):  $m/z$  (relative intensity) 198.0 ( $\text{M}^+$ , 100), 183.0 (38), 170.0 (8), 120.0 (5), 98.0 (10).

**Benzene, 1-chloro-4-[(1*E*)-2-phenylethenyl]- (Table 3, compound 3fk)<sup>3</sup>**

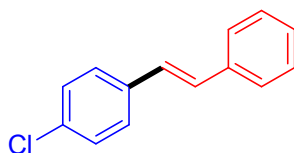

Eluents (Hexane,  $R_f = 0.49$ ) was used for flash column chromatography. White solid,  $^1\text{H}$  NMR (400 MHz,  $\text{CDCl}_3$ )  $\delta$  7.06-7.15 (m, 2H), 7.28-7.43 (m, 5H), 7.46-7.49 (m, 2H), 7.53-7.55 (m, 2H);  $^{13}\text{C}$  NMR (100 MHz,  $\text{CDCl}_3$ )  $\delta$  126.5, 127.3, 127.6, 127.8, 128.7, 128.8, 129.3, 133.1, 135.8, 136.9; MS (EI):  $m/z$  (relative intensity) 214.0 ( $\text{M}^+$ , 78), 178.0 (100), 152.0 (14), 115.0 (2), 76.0 (18).

**Naphthalene, 1-[(1*E*)-2-phenylethenyl]- (Table 3, compound 3gk)<sup>3</sup>**

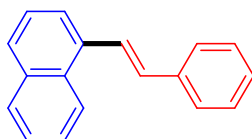

Eluents (Hexane,  $R_f$  = 0.54) was used for flash column chromatography. Yellow solid,  $^1\text{H}$  NMR (400 MHz,  $\text{CDCl}_3$ )  $\delta$  7.21 (d,  $J$  = 16.0 Hz, 1H), 7.36-7.38 (m, 1H), 7.45-7.48 (m, 2H), 7.53-7.62 (m, 3H), 7.66-7.68 (m, 2H), 7.81 (d,  $J$  = 7.2 Hz, 1H), 7.86 (d,  $J$  = 8.4 Hz, 1H), 7.92-7.97 (m, 2H), 8.28 (d,  $J$  = 8.6 Hz, 1H);  $^{13}\text{C}$  NMR (100 MHz,  $\text{CDCl}_3$ )  $\delta$  123.6, 123.7, 125.7, 125.8, 126.1, 126.7, 127.7, 128.0, 128.6, 128.7, 131.4, 131.7, 133.7, 135.0, 137.6; MS (EI):  $m/z$  (relative intensity) 229.1 ( $\text{M}^+$ , 100), 215.0 (18), 202.0 (13), 152.0 (21), 128.0 (5).

**Benzene, 1-methoxy-4-[(1*E*)-2-phenylethenyl]- (Table 3, compound 3hk)<sup>3</sup>**

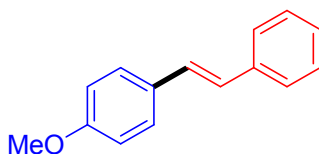

Eluents (EtOAc: Hexane = 1: 20,  $R_f$  = 0.40) was used for flash column chromatography. White solid,  $^1\text{H}$  NMR (400 MHz,  $\text{CDCl}_3$ )  $\delta$  3.87 (s, 3H), 6.93-6.97 (m, 2H), 7.01-7.14 (m, 2H), 7.26-7.31 (m, 1H), 7.38-7.41 (m, 2H), 7.49-7.55 (m, 4H);  $^{13}\text{C}$  NMR (100 MHz,  $\text{CDCl}_3$ )  $\delta$  55.29, 114.13, 126.2, 126.6, 127.2, 127.7, 128.2, 128.6, 130.1, 137.6, 159.3; MS (EI):  $m/z$  (relative intensity) 210.1 ( $\text{M}^+$ , 100), 195.0 (18), 179.0 (15), 165.0 (38), 152.0 (23).

**Benzene, 1,3,5-trimethyl-2-[(1*E*)-2-phenylethenyl]- (Table 3, compound 3ik)<sup>3</sup>**

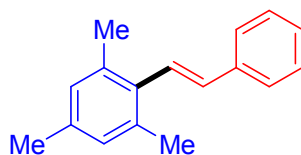

Eluents (Hexane,  $R_f$  = 0.50) was used for flash column chromatography. White solid,  $^1\text{H}$  NMR (400 MHz,  $\text{CDCl}_3$ )  $\delta$  2.36 (s, 3H), 2.41 (s, 6H), 7.66 (d,  $J$  = 16.8 Hz, 1H), 6.97 (s, 2H), 7.17 (d,  $J$  = 16.8 Hz, 1H), 7.33-7.36 (m, 1H), 7.42-7.45 (m, 2H), 7.57 (d,  $J$  = 7.2 Hz, 2H);  $^{13}\text{C}$  NMR (100 MHz,  $\text{CDCl}_3$ )  $\delta$  20.9, 126.2, 126.8, 127.4, 128.6, 133.6, 133.9, 136.1, 136.2, 137.7; MS (EI):  $m/z$  (relative intensity) 222.1 ( $\text{M}^+$ , 91), 207.1 (100), 192.0 (78), 178.0 (9), 144.0 (9).

**Benzene, 1-nitro-4-[(1*E*)-2-phenylethenyl]- (Table 3, compound 3jk)<sup>3</sup>**

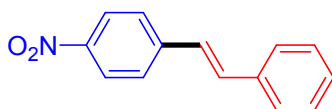

Eluents (EtOAc: Hexane = 1: 9,  $R_f$  = 0.70) was used for flash column chromatography. Yellow solid,  $^1\text{H}$  NMR (400 MHz,  $\text{CDCl}_3$ )  $\delta$  7.17 (d,  $J$  = 16.4 Hz, 1H), 7.27-7.45 (m, 4H), 7.56-7.59 (m, 2H), 7.64-7.67 (m, 2H), 8.22-8.26 (m, 2H);  $^{13}\text{C}$  NMR (100 MHz,  $\text{CDCl}_3$ )  $\delta$  124.1, 126.3, 126.8, 127.0, 128.9, 133.3, 136.2, 143.8, 146.8; MS (EI):  $m/z$  (relative intensity) 225.0 ( $\text{M}^+$ , 83), 207.0 (9), 178.0 (100), 165.0 (13), 152.0 (25).

**2-Propenoic acid, 3-(4-methylphenyl)-, methyl ester, (2E)- (Table 3, compound 3al)<sup>5</sup>**

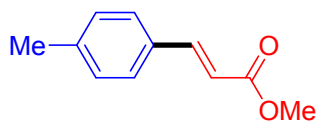

Eluents (EtOAc: Hexane = 1: 9,  $R_f$  = 0.53) was used for flash column chromatography. White solid,  $^1\text{H}$  NMR (400 MHz,  $\text{CDCl}_3$ )  $\delta$  2.40 (s, 3H), 3.82 (s, 3H), 6.42 (d,  $J$  = 16.0 Hz, 1H), 7.21 (d,  $J$  = 8.0 Hz, 2H), 7.44 (d,  $J$  = 8.0 Hz, 2H), 7.70 (d,  $J$  = 16.0 Hz, 1H);  $^{13}\text{C}$  NMR (100 MHz,  $\text{CDCl}_3$ )  $\delta$  21.4, 51.6, 116.7, 128.0, 129.6, 131.6, 140.7, 144.8, 167.6; MS (EI):  $m/z$  (relative intensity) 176.0 ( $\text{M}^+$ , 63), 161.0 (6), 145.0 (100), 115.0 (50), 91.0 (20).

**2-Propenoic acid, 3-(4-methylphenyl)-, ethyl ester, (2E)- (Table 3, compound 3am)<sup>6</sup>**

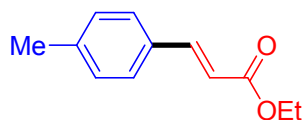

Eluents (EtOAc: Hexane = 1: 20,  $R_f$  = 0.52) was used for flash column chromatography. Yellow liquid,  $^1\text{H}$  NMR (400 MHz,  $\text{CDCl}_3$ )  $\delta$  1.36 (t,  $J$  = 7.2 Hz, 3H), 2.39 (s, 3H), 4.26 – 4.31 (m, 2H), 6.42 (d,  $J$  = 16.0 Hz, 1H), 7.21 (d,  $J$  = 8.0 Hz, 2H), 7.44 (d,  $J$  = 8.0 Hz, 2H), 7.69 (d,  $J$  = 15.6 Hz, 1H);  $^{13}\text{C}$  NMR (100 MHz,  $\text{CDCl}_3$ )  $\delta$  14.3, 21.4, 60.4, 117.1, 128.0, 129.6, 131.7, 140.6, 144.5, 167.1; MS (EI):  $m/z$  (relative intensity) 190.0 ( $\text{M}^+$ , 48), 175.0 (3), 162.0 (13), 145.0 (100), 115.0 (46).

**2-Propenoic acid, 3-(4-methylphenyl)-, butyl ester, (2E)- (Table 3, compound 3an)<sup>3</sup>**

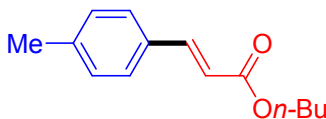

Eluents (EtOAc: Hexane = 1: 20,  $R_f$  = 0.52) was used for flash column chromatography. Colorless liquid,  $^1\text{H}$  NMR (400 MHz,  $\text{CDCl}_3$ )  $\delta$  0.99 (t,  $J$  = 7.6 Hz, 3H), 1.44-1.49 (m, 2H), 1.69 – 1.73 (m, 2H), 2.39 (s, 3H), 4.23 (t,  $J$  = 6.4 Hz, 2H), 6.42 (d,  $J$  = 16.0 Hz, 1H), 7.21 (d,  $J$  = 8.0 Hz, 2H), 7.45 (d,  $J$  = 8.0 Hz, 2H), 7.68 (d,  $J$  = 16.0 Hz, 1H);  $^{13}\text{C}$  NMR (100 MHz,  $\text{CDCl}_3$ )  $\delta$  13.7, 19.1, 21.4 30.7, 64.2, 117.1, 128.0, 129.5, 131.7, 140.5, 144.5, 167.2; MS (EI):  $m/z$  (relative intensity) 218.1 ( $\text{M}^+$ , 26), 162.0 (95), 145.0 (100), 115.0 (51), 91.0 (25).

**2-Propenoic acid, 3-(1-naphthalenyl)-, butyl ester, (2E)- (Table 3, compound 3gn)<sup>7</sup>**

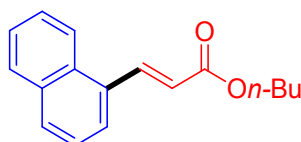

Eluents (EtOAc: Hexane = 1: 20,  $R_f$  = 0.64) was used for flash column chromatography. Yellow liquid,  $^1\text{H}$  NMR (400 MHz,  $\text{CDCl}_3$ )  $\delta$  1.04 (t,  $J$  = 7.2 Hz, 3H), 1.49-1.54 (m, 2H), 1.74-1.79 (m, 2H), 4.31 (t,  $J$  = 6.4 Hz, 2H), 6.58 (d,  $J$  = 15.6 Hz, 1H), 7.49-7.63 (m, 3H), 7.78 (d,  $J$  = 6.8 Hz, 1H), 7.91 (t,  $J$  = 7.2 Hz, 2H), 8.23 (d,  $J$  = 8.4 Hz, 1H), 8.57 (d,  $J$  = 15.6 Hz, 1H);  $^{13}\text{C}$  NMR (100 MHz,  $\text{CDCl}_3$ )  $\delta$  13.7, 19.2, 30.8, 64.5, 120.9, 123.3, 124.9, 125.4, 126.1, 126.8, 128.7, 130.4, 131.4, 131.8, 133.6,

141.5, 166.9; MS (EI):  $m/z$  (relative intensity) 254.1 ( $M^+$ , 27), 198.0 (7), 181.0 (25), 153.0 (100), 76.1 (5).

**2-Propenoic acid, 3-(2-naphthalenyl)-, butyl ester, (2E)- (Table 3, compound 3cn)<sup>5</sup>**

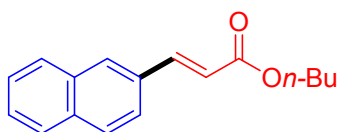

Eluents (EtOAc: Hexane = 1: 20,  $R_f$  = 0.60) was used for flash column chromatography. Colorless liquid,  $^1\text{H}$  NMR (400 MHz,  $\text{CDCl}_3$ )  $\delta$  1.02 (t,  $J$  = 7.2 Hz, 3H), 1.47-1.53 (m, 2H), 1.71-1.77 (m, 2H), 4.28 (t,  $J$  = 6.8 Hz, 2H), 6.59 (d,  $J$  = 16.0 Hz, 1H), 7.52-7.54 (m, 2H), 7.68 (d,  $J$  = 8.4 Hz, 1H), 7.83-7.94 (m, 5H);  $^{13}\text{C}$  NMR (100 MHz,  $\text{CDCl}_3$ )  $\delta$  1.0, 13.7, 19.2, 30.8, 64.4, 118.4, 123.4, 126.6, 127.1, 127.7, 128.5, 128.6, 129.8, 131.9, 133.2, 134.1, 144.5, 167.1; MS (EI):  $m/z$  (relative intensity) 254.1 ( $M^+$ , 52), 198.0 (100), 181.0 (70), 152.0 (65), 127.0 (11).

**2-Propenoic acid, 3-(2,4,6-trimethylphenyl)-, butyl ester, (2E)- (Table 3, compound 3in)<sup>5</sup>**

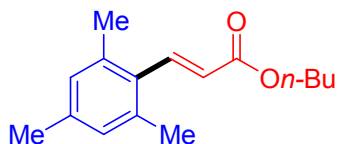

Eluents (EtOAc: Hexane = 1: 20,  $R_f$  = 0.49) was used for flash column chromatography. White solid,  $^1\text{H}$  NMR (400 MHz,  $\text{CDCl}_3$ )  $\delta$  1.01 (t,  $J$  = 7.6 Hz,

3H), 1.45-1.51 (m, 2H), 1.70-1.75 (m, 2H), 2.32 (s, 3H), 2.36 (s, 6H), 4.25 (t,  $J$ = 6.8 Hz, 2H), 6.09 (d,  $J$ = 16.4Hz, 1H), 6.92 (s, 2H), 7.87 (d,  $J$ = 16.4Hz, 1H);  $^{13}\text{C}$  NMR (100 MHz,  $\text{CDCl}_3$ )  $\delta$  13.7, 19.2, 20.9, 21.0, 30.7, 64.3, 123.1, 129.1, 130.9, 136.7, 138.2, 143.1, 167.0; MS (EI):  $m/z$  (relative intensity) 246.1 ( $\text{M}^+$ , 27), 231.1 (5), 173.0 (100), 144.1 (52), 129.0 (39).

**Benzene, 1-fluoro-4-[(1*E*)-2-(4-methylphenyl)ethenyl]- (Table 3, compound 3ao)<sup>8</sup>**

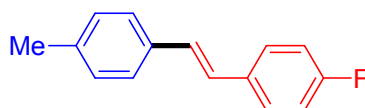

Eluents (Hexane,  $R_f$ = 0.56) was used for flash column chromatography. White solid,  $^1\text{H}$  NMR (400 MHz,  $\text{CDCl}_3$ )  $\delta$  2.41 (s, 3H), 7.05-7.11 (m, 4H), 7.22 (d,  $J$ = 8.0 Hz, 2H), 7.45 (d,  $J$ = 8.0 Hz, 2H), 7.49-7.52 (m, 2H);  $^{13}\text{C}$  NMR (100 MHz,  $\text{CDCl}_3$ )  $\delta$  21.2, 115.4, 115.6, 126.3, 126.4, 127.7, 127.8, 128.4, 129.4, 133.6, 134.3, 137.5, 160.9, 163.4;  $^{19}\text{F}$  NMR (400 MHz,  $\text{CDCl}_3$ )  $\delta$  -114.6; MS (EI):  $m/z$  (relative intensity) 212.1 ( $\text{M}^+$ , 100), 197.0 (67), 177.0 (18), 115.0 (8), 91.1 (10).

**Benzene, 1-fluoro-3-[2-(4-methylphenyl)ethenyl]-, (*E*)- (Table 3, compound 3ap)<sup>9</sup>**

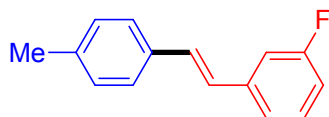

Eluents (Hexane,  $R_f$ = 0.56) was used for flash column chromatography. White solid,  $^1\text{H}$  NMR (400 MHz,  $\text{CDCl}_3$ )  $\delta$  2.42 (s, 3H), 6.96-7.01 (m, 1H), 7.04-7.15 (m, 2H),

7.22-7.38 (m, 5H), 7.46 (d,  $J$ = 8.0 Hz, 2H);  $^{13}\text{C}$  NMR (100 MHz,  $\text{CDCl}_3$ )  $\delta$  21.3, 112.5, 112.7, 114.0, 114.2, 122.3, 126.5, 126.8, 129.4, 130.0, 134.0, 138.0, 139.9, 162.0, 164.4;  $^{19}\text{F}$  NMR (400 MHz,  $\text{CDCl}_3$ )  $\delta$  -113.5; MS (EI):  $m/z$  (relative intensity) 212.1 ( $\text{M}^+$ , 100), 197.0 (88), 177.0 (24), 115.0 (8), 91.1 (10).

**Benzene, 1-chloro-4-[(1*E*)-2-(4-methylphenyl)ethenyl]- (Table 3, compound 3aq)<sup>3</sup>**

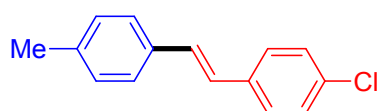

Eluents (Hexane,  $R_f$ = 0.56) was used for flash column chromatography. White solid,  $^1\text{H}$  NMR (400 MHz,  $\text{CDCl}_3$ )  $\delta$  2.39 (s, 3H), 7.00-7.11 (m, 2H), 7.20 (d,  $J$ = 7.6 Hz, 2H), 7.33-7.36 (m, 2H), 7.42-7.47 (m, 4H);  $^{13}\text{C}$  NMR (100 MHz,  $\text{CDCl}_3$ )  $\delta$  21.3, 126.4, 126.5, 127.5, 128.8, 129.3, 129.4, 132.9, 134.2, 136.1, 137.8; MS (EI):  $m/z$  (relative intensity) 228.0 ( $\text{M}^+$ , 100), 213.0 (16), 192.0 (26), 178.0 (95), 94.7 (12).

**Benzene, 1,1'-(1*E*)-1,2-ethenediylbis[4-methyl- (Table 3, compound 3ar)<sup>3</sup>**

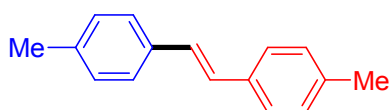

Eluents (Hexane,  $R_f$ = 0.56) was used for flash column chromatography. White solid,  $^1\text{H}$  NMR (400 MHz,  $\text{CDCl}_3$ )  $\delta$  2.42 (s, 6H), 7.10 (s, 2H), 7.22 (d,  $J$ = 8.0 Hz, 4H), 7.46 (d,  $J$ = 8.0 Hz, 4H);  $^{13}\text{C}$  NMR (100 MHz,  $\text{CDCl}_3$ )  $\delta$  21.2, 126.3, 127.6, 129.3, 134.7, 137.2; MS (EI):  $m/z$  (relative intensity) 208.1 ( $\text{M}^+$ , 100), 193.0 (57), 178.0 (59), 152.0 (5), 115.0 (13).

**Benzene, 1-methoxy-4-[(1*E*)-2-(4-methylphenyl)ethenyl]- (Table 3, compound 3as)<sup>3</sup>**

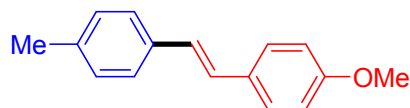

Eluents (EtOAc: Hexane = 1: 20,  $R_f$  = 0.48) was used for flash column chromatography. White solid,  $^1\text{H}$  NMR (400 MHz,  $\text{CDCl}_3$ )  $\delta$  2.40 (s, 3H), 3.86 (s, 3H), 6.92-6.96 (m, 2H), 6.97-7.09 (m, 2H), 7.20 (d,  $J$  = 7.6 Hz, 2H), 7.42-7.50 (m, 4H);  $^{13}\text{C}$  NMR (100 MHz,  $\text{CDCl}_3$ )  $\delta$  21.2, 55.3, 114.1, 126.1, 126.5, 127.2, 127.6, 129.3, 130.3, 134.8, 137.0, 159.1; MS (EI):  $m/z$  (relative intensity) 224.1 ( $\text{M}^+$ , 100), 209.0 (25), 194.0 (5), 178.0 (9), 165.0 (33).

**Benzene, 1-[(1*E*)-2-(4-methylphenyl)ethenyl]-4-(trifluoromethyl)- (Table 3, compound 3at)<sup>9</sup>**

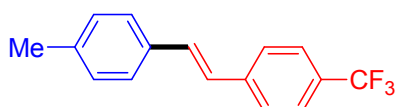

Eluents (Hexane,  $R_f$  = 0.56) was used for flash column chromatography. White solid,  $^1\text{H}$  NMR (400 MHz,  $\text{CDCl}_3$ )  $\delta$  2.41 (s, 3H), 7.10 (d,  $J$  = 16.4 Hz, 1H), 7.18-7.23 (m, 3H), 7.46 (d,  $J$  = 8.4 Hz, 2H), 7.59-7.64 (m, 4H);  $^{13}\text{C}$  NMR (100 MHz,  $\text{CDCl}_3$ )  $\delta$  , 21.3, 125.6, 126.1, 126.4, 126.7, 128.8, 129.5, 131.1, 133.8, 138.3, 141.0;  $^{19}\text{F}$  NMR (400 MHz,  $\text{CDCl}_3$ )  $\delta$  -62.4; MS (EI):  $m/z$  (relative intensity) 262.1 ( $\text{M}^+$ , 100), 247.0 (41), 227.0 (18), 115.0 (7), 91.0 (8).

**Benzene, 1-bromo-2-[(1*E*)-2-(4-methylphenyl)ethenyl]- (Table 3, compound 3au)<sup>10</sup>**

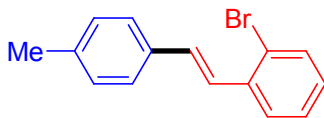

Eluents (Hexane,  $R_f = 0.56$ ) was used for flash column chromatography. Colorless liquid,  $^1\text{H}$  NMR (400 MHz,  $\text{CDCl}_3$ )  $\delta$  2.41 (s, 3H), 7.06 (d,  $J = 16.0$  Hz, 1H), 7.12-7.16 (m, 1H), 7.20-7.23 (m, 2H), 7.32-7.36 (m, 1H), 7.44-7.50 (m, 3H), 7.60-7.63 (m, 1H), 7.69-7.71 (m, 1H);  $^{13}\text{C}$  NMR (100 MHz,  $\text{CDCl}_3$ )  $\delta$  21.3, 124.0, 126.5, 127.5, 128.5, 128.9, 129.4, 131.4, 132.9, 133.0, 134.2, 137.3, 138.0; MS (EI):  $m/z$  (relative intensity) 272.0 ( $\text{M}^+$ , 38), 193.0 (23), 178.0 (100), 165.0 (12), 115.0 (7).

**Benzene, 1-chloro-4-[(1*E*)-2-(1,3,5-trimethylphenyl)ethenyl]- (Table 3, compound 3fv)**

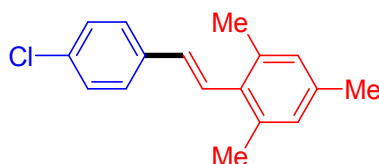

Eluents (Hexane,  $R_f = 0.55$ ) was used for flash column chromatography. White solid,  $^1\text{H}$  NMR (400 MHz,  $\text{CDCl}_3$ )  $\delta$  2.35 (s, 3H), 2.40 (s, 6H), 6.60 (d,  $J = 16.8$  Hz, 1H), 6.97 (s, 2H), 7.13 (d,  $J = 16.4$  Hz, 1H), 7.37-7.40 (m, 2H), 7.45-7.48 (m, 2H);  $^{13}\text{C}$  NMR (100 MHz,  $\text{CDCl}_3$ )  $\delta$  21.0, 127.4, 127.6, 132.3, 133.0, 133.6, 136.1, 136.2, 136.5; MS (EI):  $m/z$  (relative intensity) 256.0 ( $\text{M}^+$ , 63), 241.0 (23), 221.1 (27), 206.0 (100), 191.0 (15); IR (KBr,  $\text{cm}^{-1}$ ) 3027, 1631, 1489, 981, 812; HRMS (ESI) calcd. for  $\text{C}_{17}\text{H}_{17}\text{Cl} [\text{M} + \text{H}^+]$ : 256.1019, found 256.1018.

**8.  $^1\text{H}$ ,  $^{13}\text{C}$ ,  $^{19}\text{F}$ , HRMS and IR spectra**

phenyl ester

7.461  
7.456  
7.448  
7.442  
7.440  
7.434  
7.426  
7.421  
7.415  
7.317  
7.314  
7.311  
7.299  
7.295  
7.291  
7.279  
7.277  
7.274  
7.260  
7.231  
7.228  
7.222  
7.213  
7.211  
7.209  
7.206  
7.200

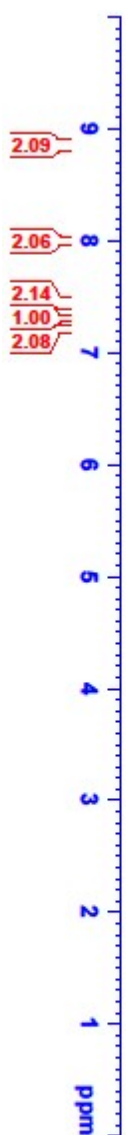

```

NAME Standard 1H
EXPNO 169
PROCNO 1
Date_ 20120508
Time 13.45
INSTRUM spect
PROBHD 5 mm PABBO BB-
PULPROG zg30
TD 32768
SCXVNT CDC13
NS 9
DS 2
SWH 8012.820 Hz
FIDRES 0.244532 Hz
AQ 2.0447731 sec
RG 57
RG 62.400 usec
DW 6.50 usec
DE 298.7 K
TE 1.00000000 sec
D1 1
TD0 1

===== CHANNEL f1 =====
NUC1 1H
P1 14.70 usec
PL1 0.00 dB
PL1W 11.86122272 W
SFO1 400.1320007 MHz
SI 32768
SF 400.1300094 MHz
WDW EM
SSB 0
LB 0.00 Hz
GB 0
PC 1.00

```

phenyl ester

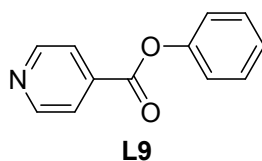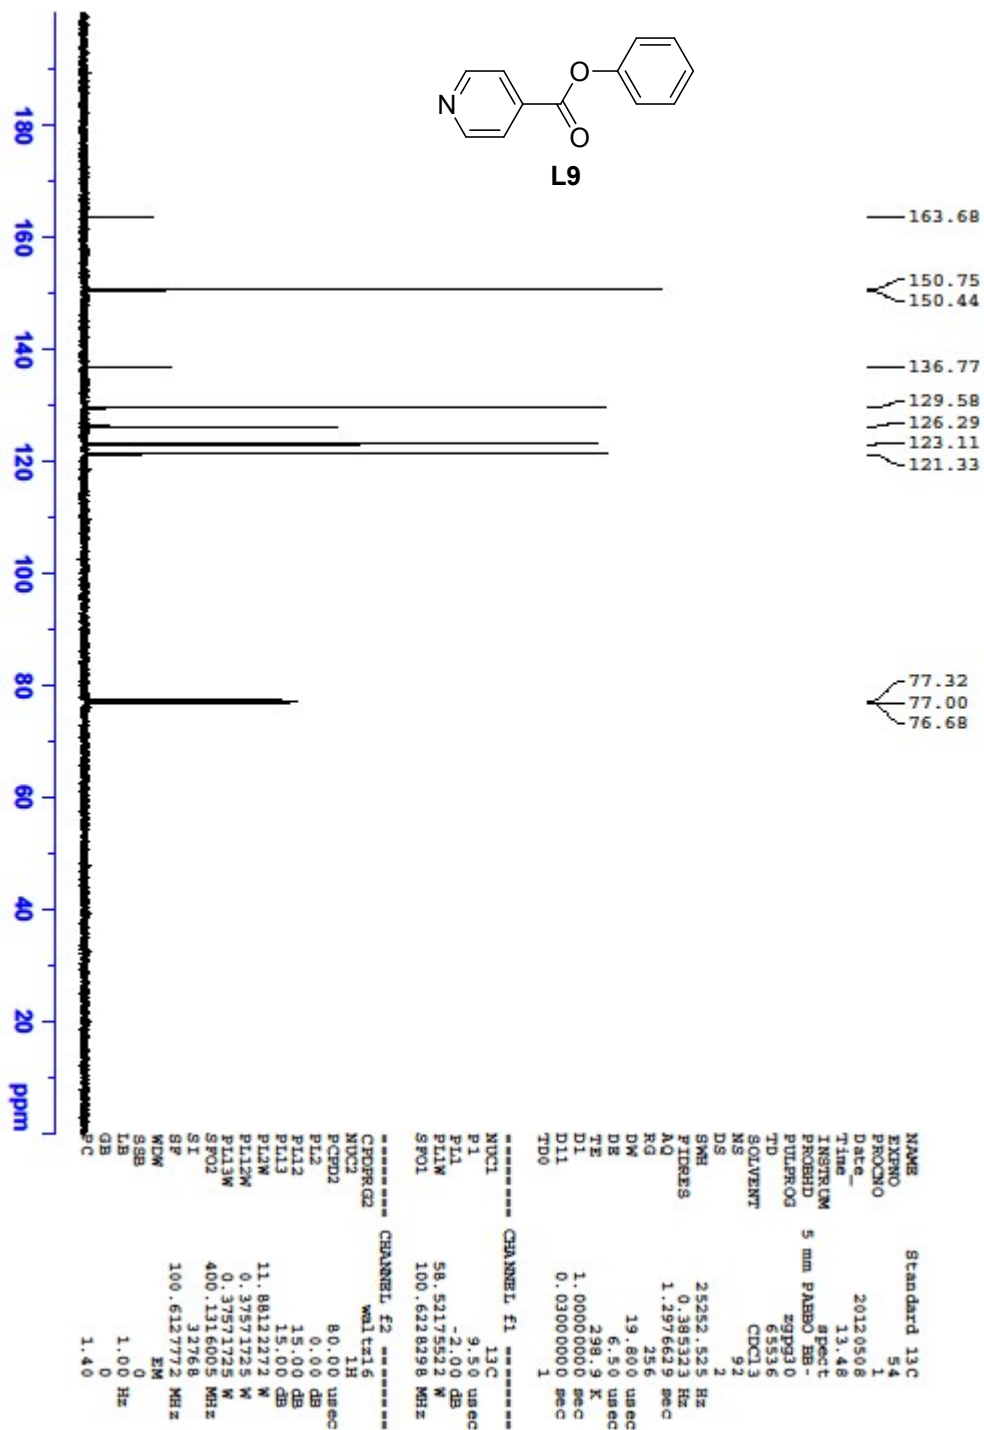

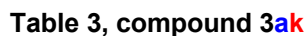

FC813C

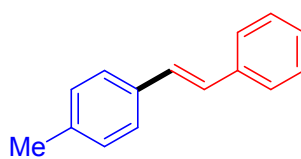

Table 3, compound 3ak

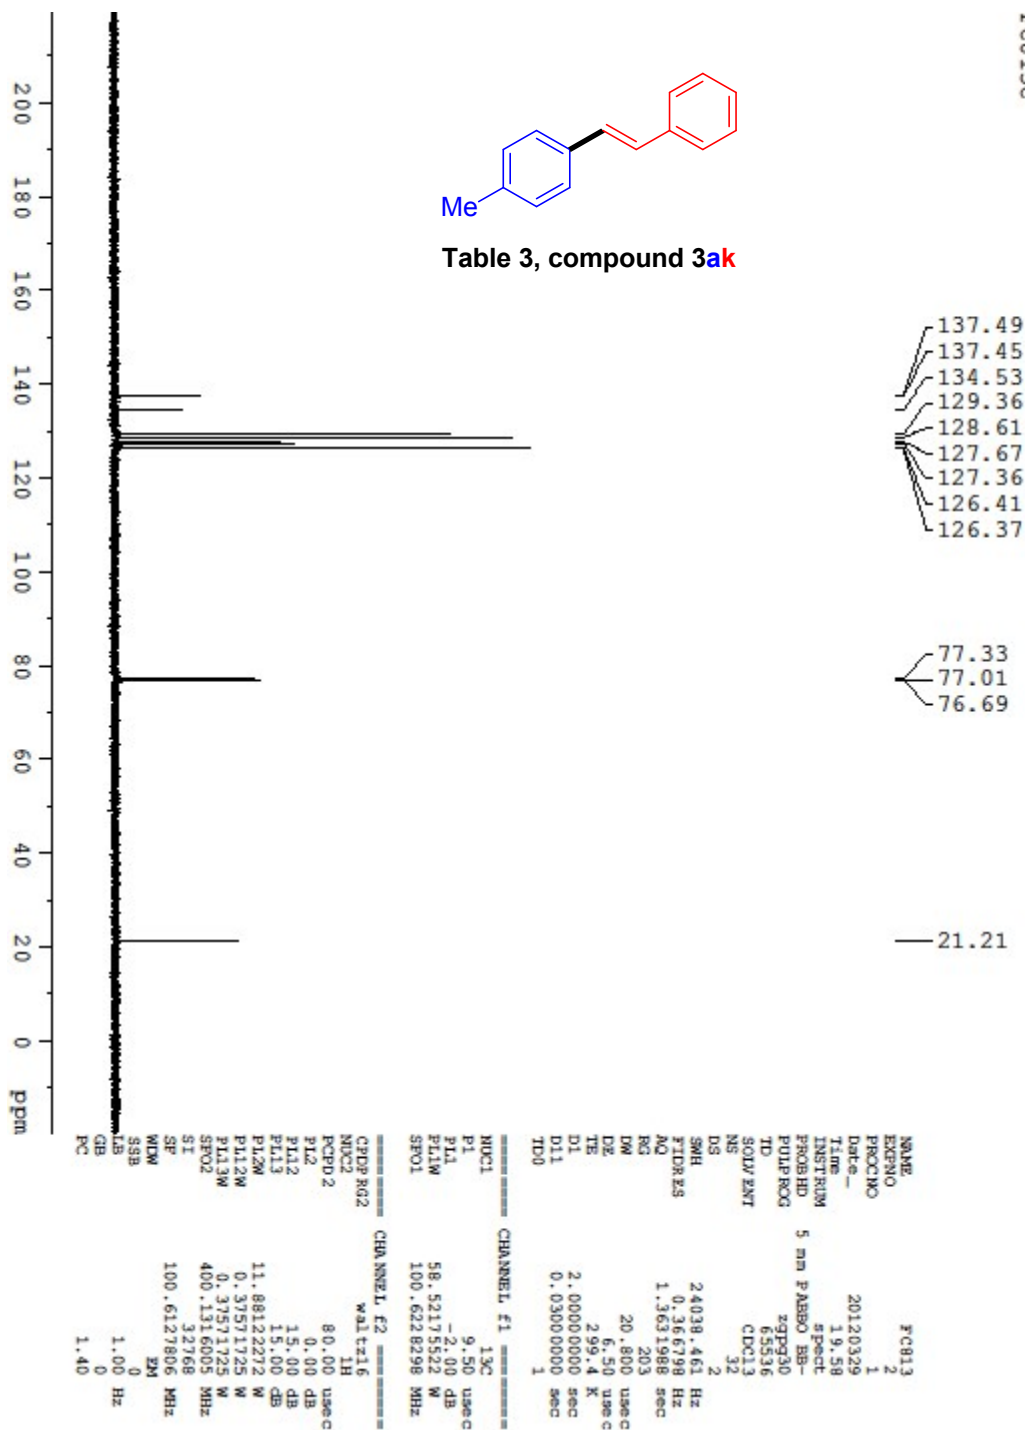

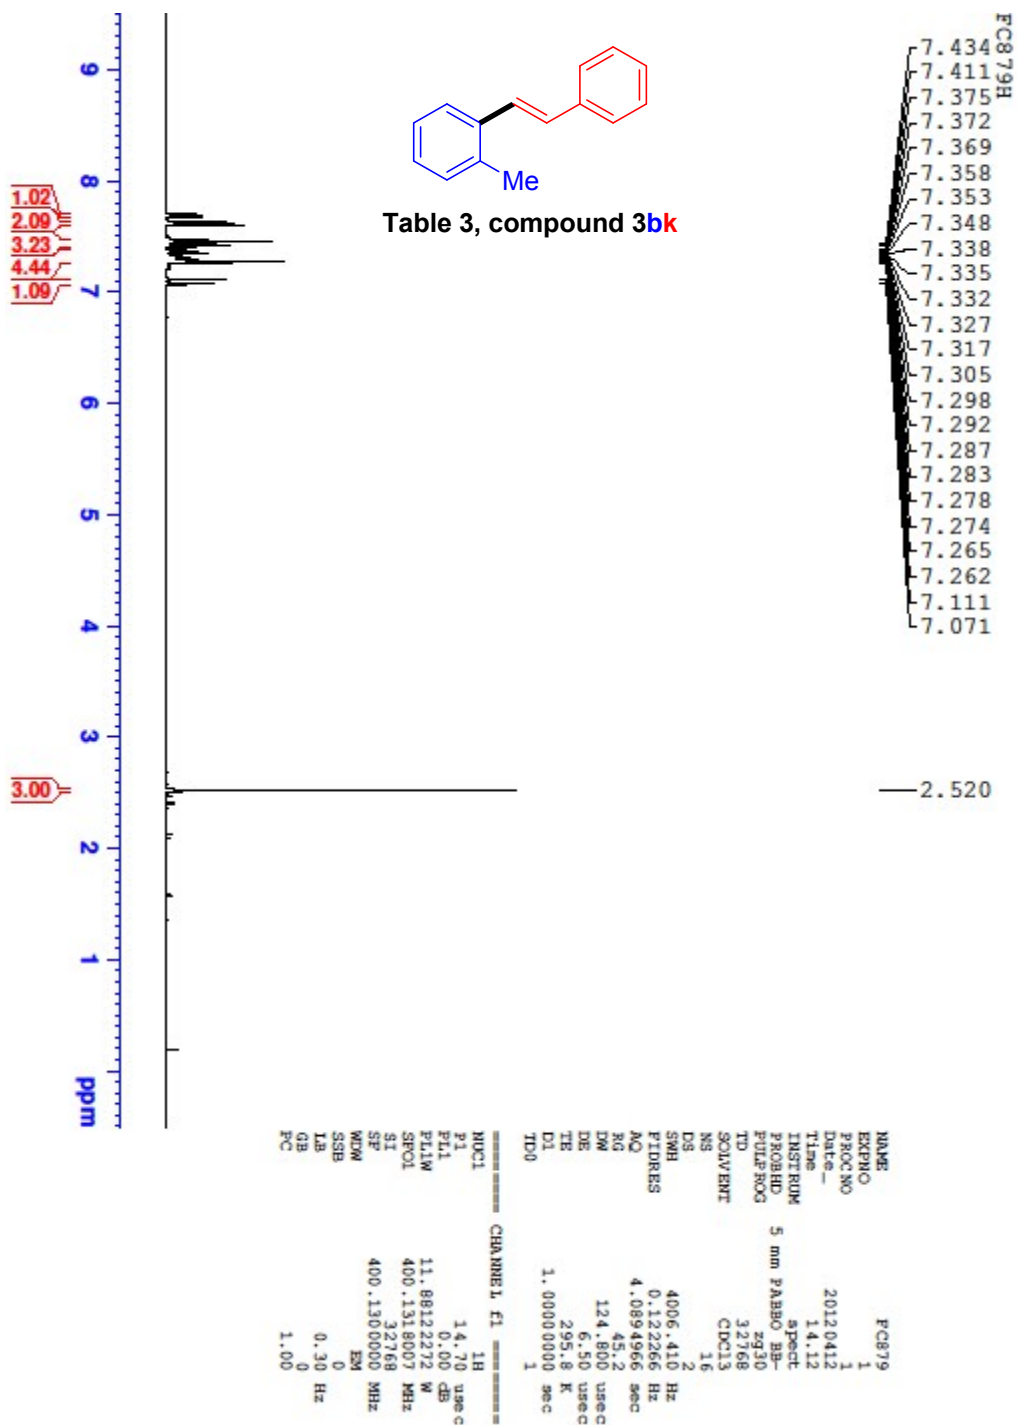

Cc1ccccc1/C=C/c2ccccc2

Table 3, compound 3bk

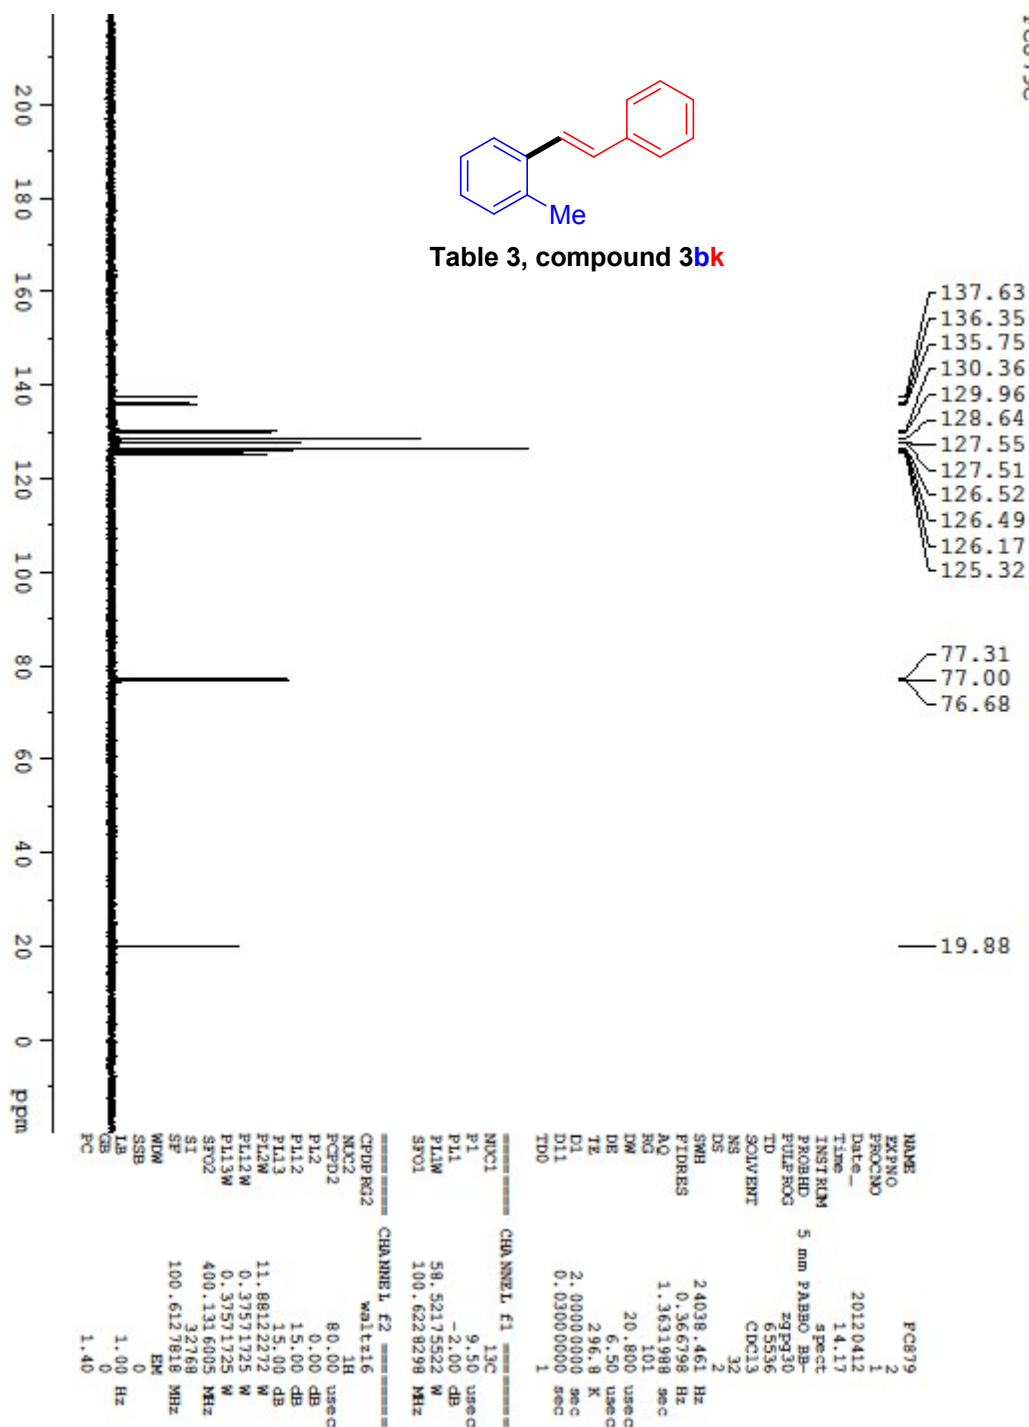

PC864

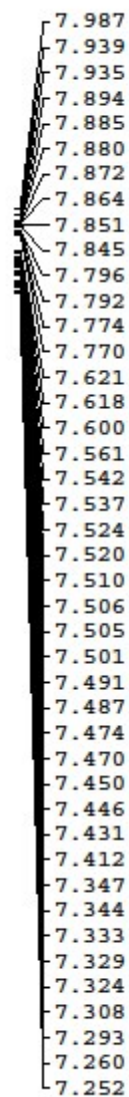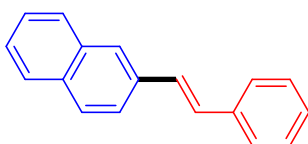

Table 3, compound 3ck

NAME Standard 1k  
EXPNO 1  
PROCNO 1  
Date\_ 20120408  
Time 23.07  
INSTRUM spect  
PROBHD 5 mm PABBO BB-  
PULPROG zg30  
TD 32768  
F2 32768  
SOLVENT CDCl3  
NS 16  
DS 2  
SWH 8012.820 Hz  
FIDRES 0.244532 Hz  
AQ 2.044731 sec  
RG 45.2  
DW 62.400 usec  
DE 6.50 usec  
TE 297.0 K  
D1 1.00000000 sec  
TDO 1

===== CHANNEL f1 =====  
NUC1 1H  
P1 14.70 usec  
PL1 0.00 dB  
PL1W 11.8812272 W  
SFO1 400.1320007 MHz  
SI 32768  
SF 400.1300094 MHz  
WDW EM  
SSB 0  
LB 0.00 Hz  
GB 0  
PC 1.00

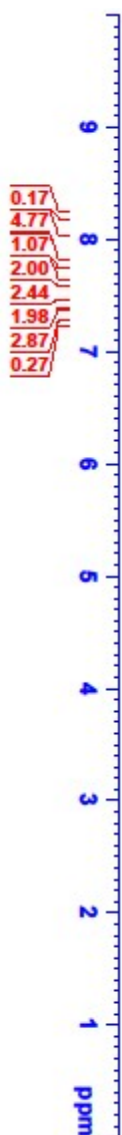

FC864C

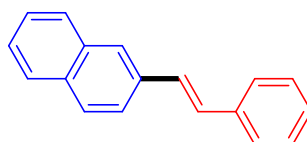

Table 3, compound 3ck

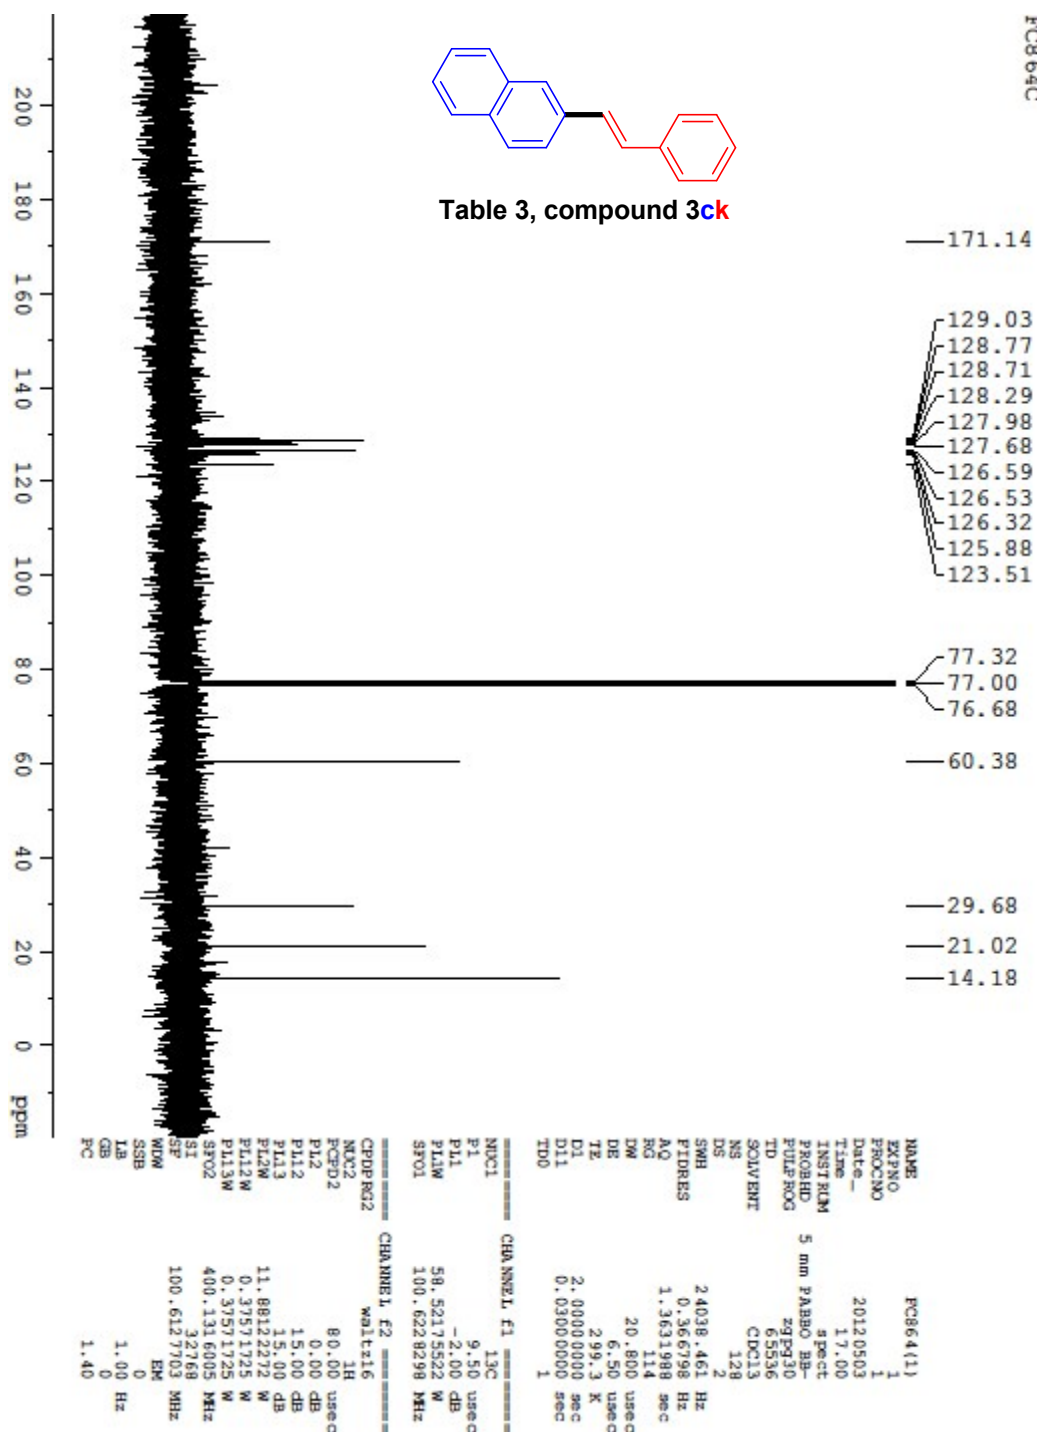

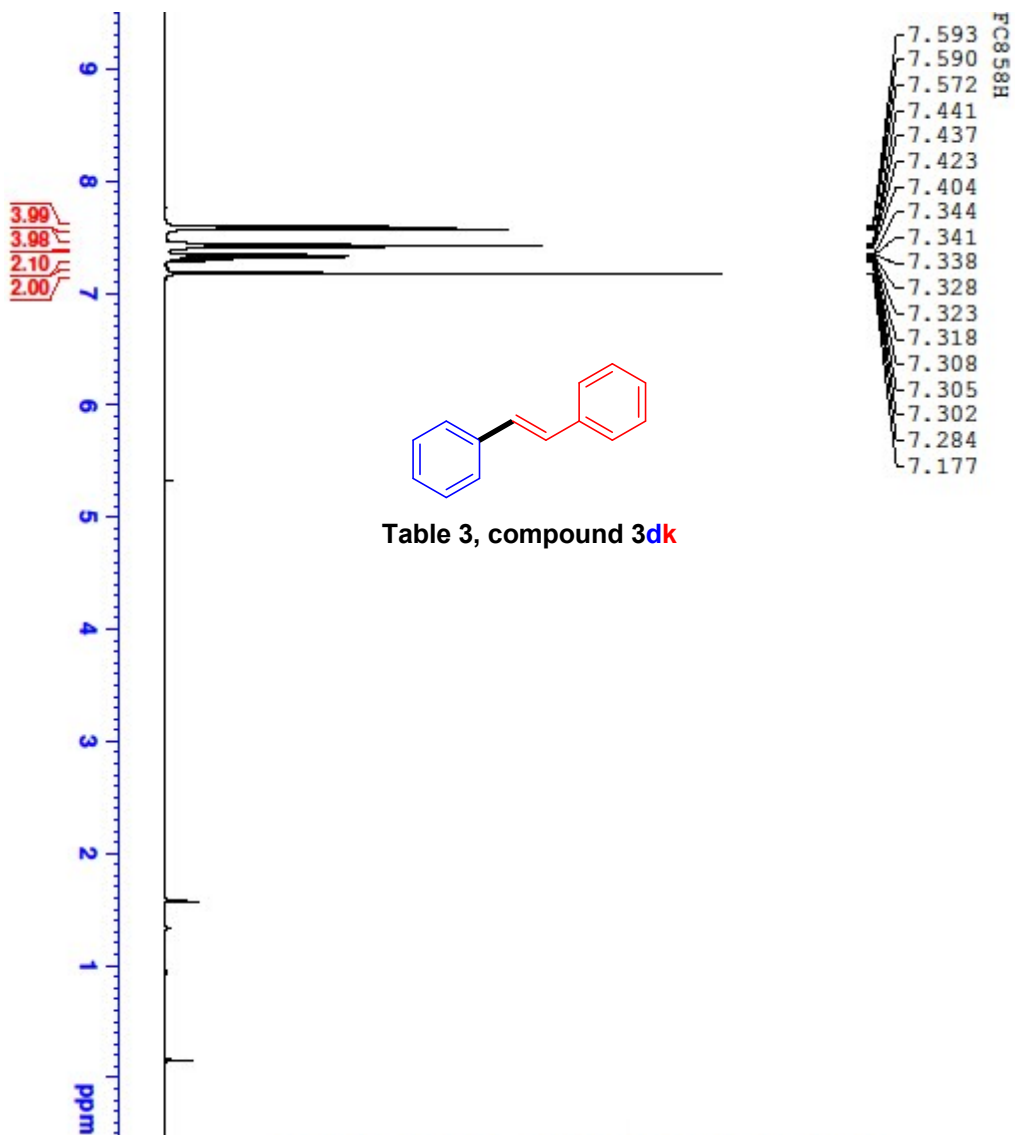

```

NAME          FC858
EXPNO         1
PROCNO        1
Date_         20120408
Time         17.57
INSTRUM       spect
PROBHD        5 mm PABBO BB-
PULPROG       zg30
TD            32768
SOLVENT       CDCl3
NS            16
DS            2
SWH           4006.410 Hz
FIDRES       0.122266 Hz
AQ           4.0894966 sec
RG            64
IW           124.800 usec
DE            6.50 usec
TE           296.4 K
D1            1.0000000 sec
TD0           1

===== CHANNEL f1 =====
NUC1          1H
P1           14.70 usec
PL1          0.00 dB
PL1W         11.88122272 W
SFO1         400.1318007 MHz
SI           32768
SF           400.1300000 MHz
WDW          EM
SSB           0
LB           0.30 Hz
GB           0
PC           1.00

```

FC858C

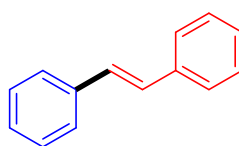

Table 3, compound 3d**k**

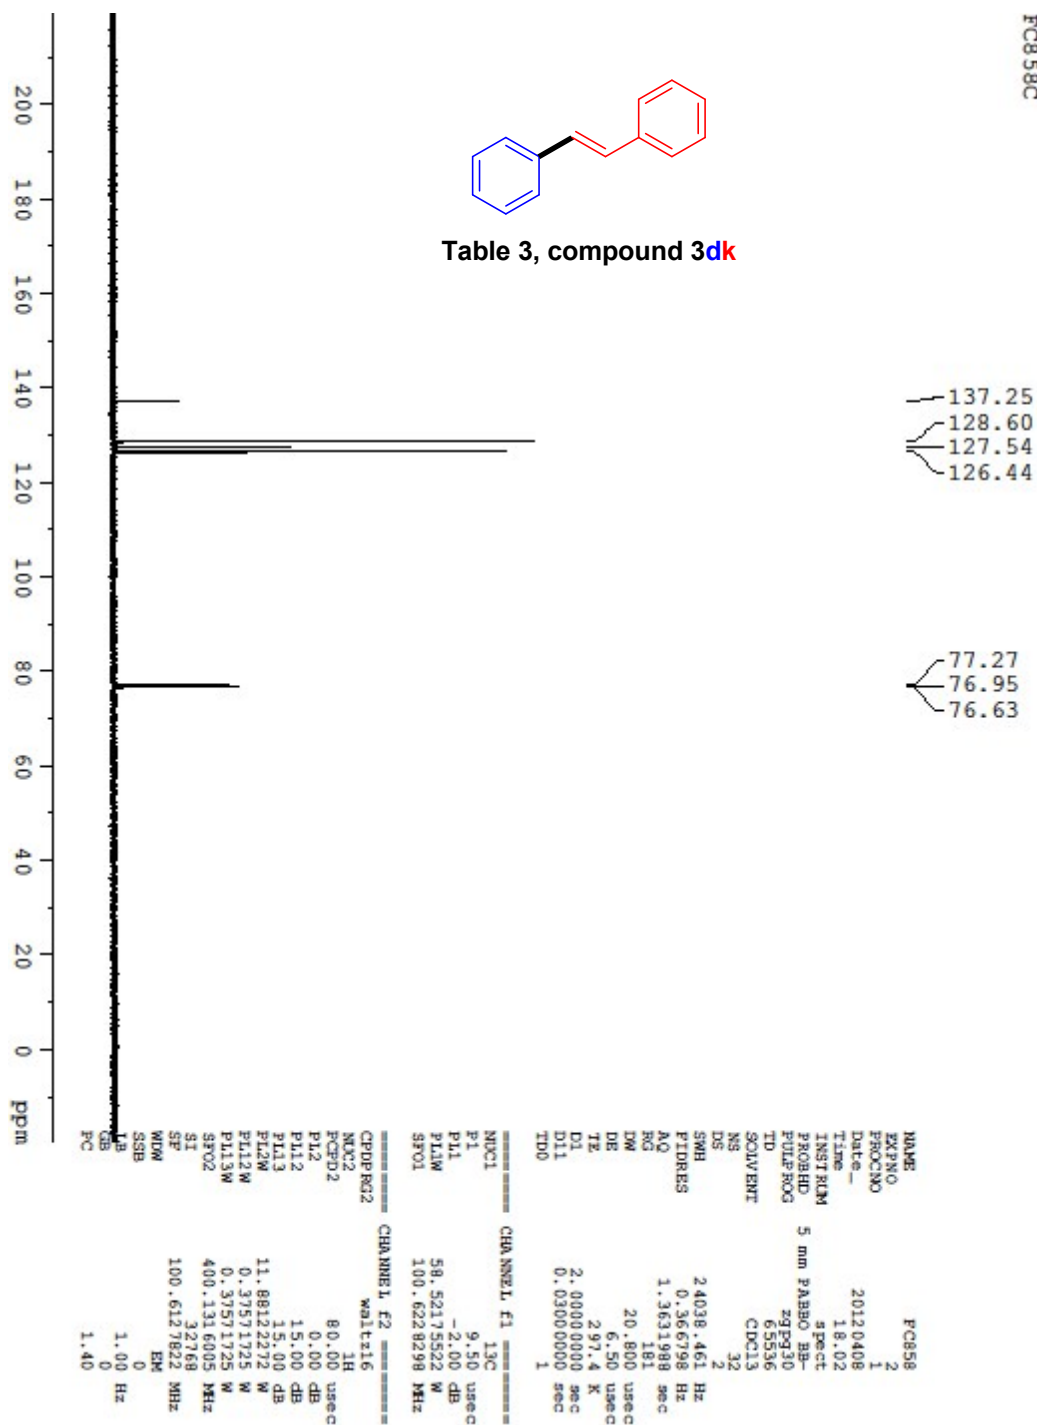

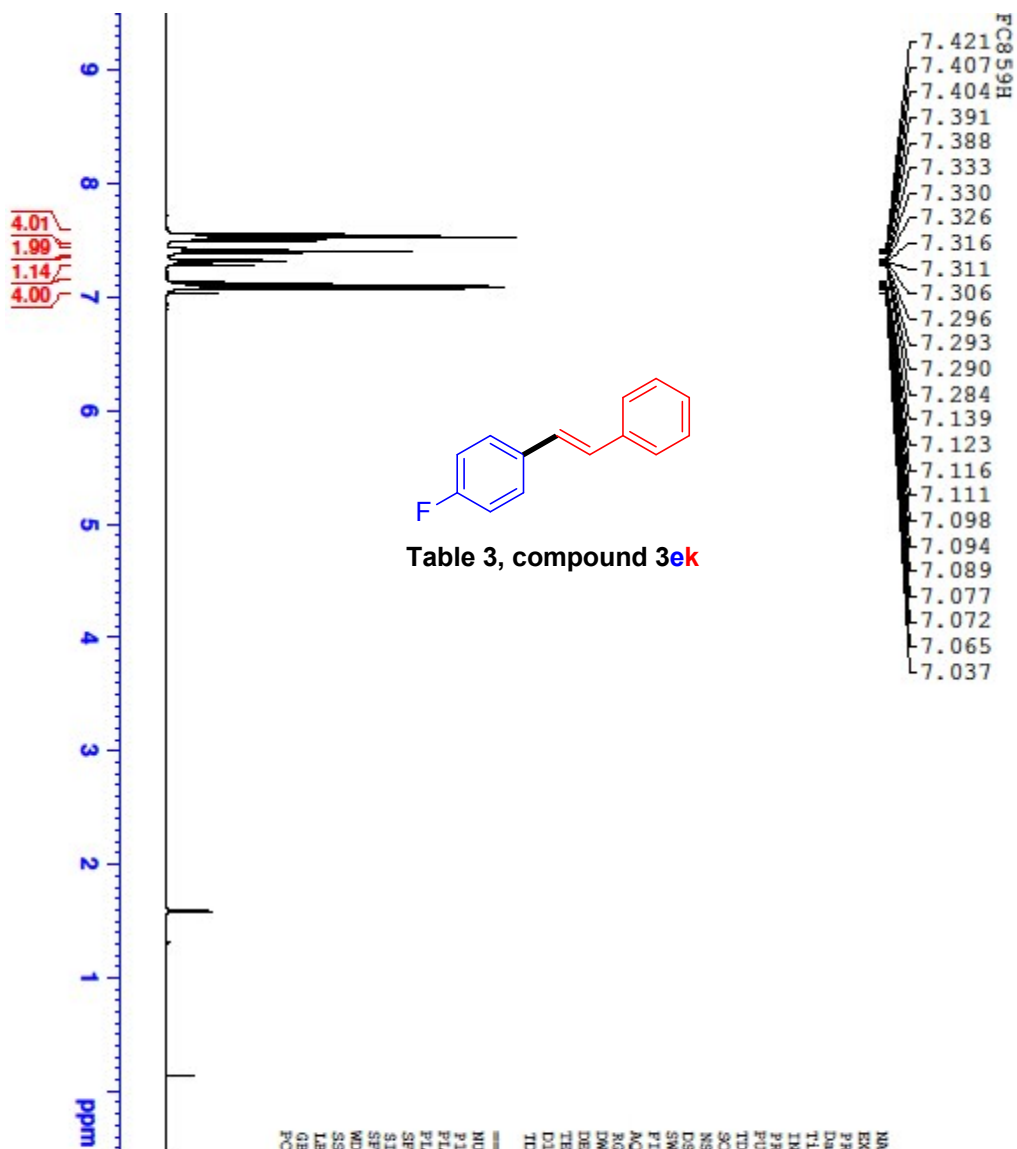

Table 3, compound 3ek

```

NAME          FC859
EXPNO         1
PROCNO        1
Date_         20120410
Time          13.35
INSTRUM       spect
PROBHD        5 mm PABBO BB-
PULPROG       zg30
TD            32768
SOLVENT       CDCl3
NS            16
DS            2
SWH            4006.410 Hz
FIDRES        0.122266 Hz
AQ            4.0894966 sec
RG            71.8
DE            124.800 usec
TE            294.9 K
D1            1.00000000 sec
TD0           1

===== CHANNEL f1 =====
NUC1          1H
P1            14.70 usec
PL1           0.00 dB
PL1W          11.8812272 W
SFO1          400.1318007 MHz
SI            32768
SF            400.1300000 MHz
WDW           EM
SSB           0
LB            0.30 Hz
GB            0
PC            1.00

```

FC859C

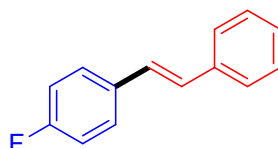

Table 3, compound 3ek

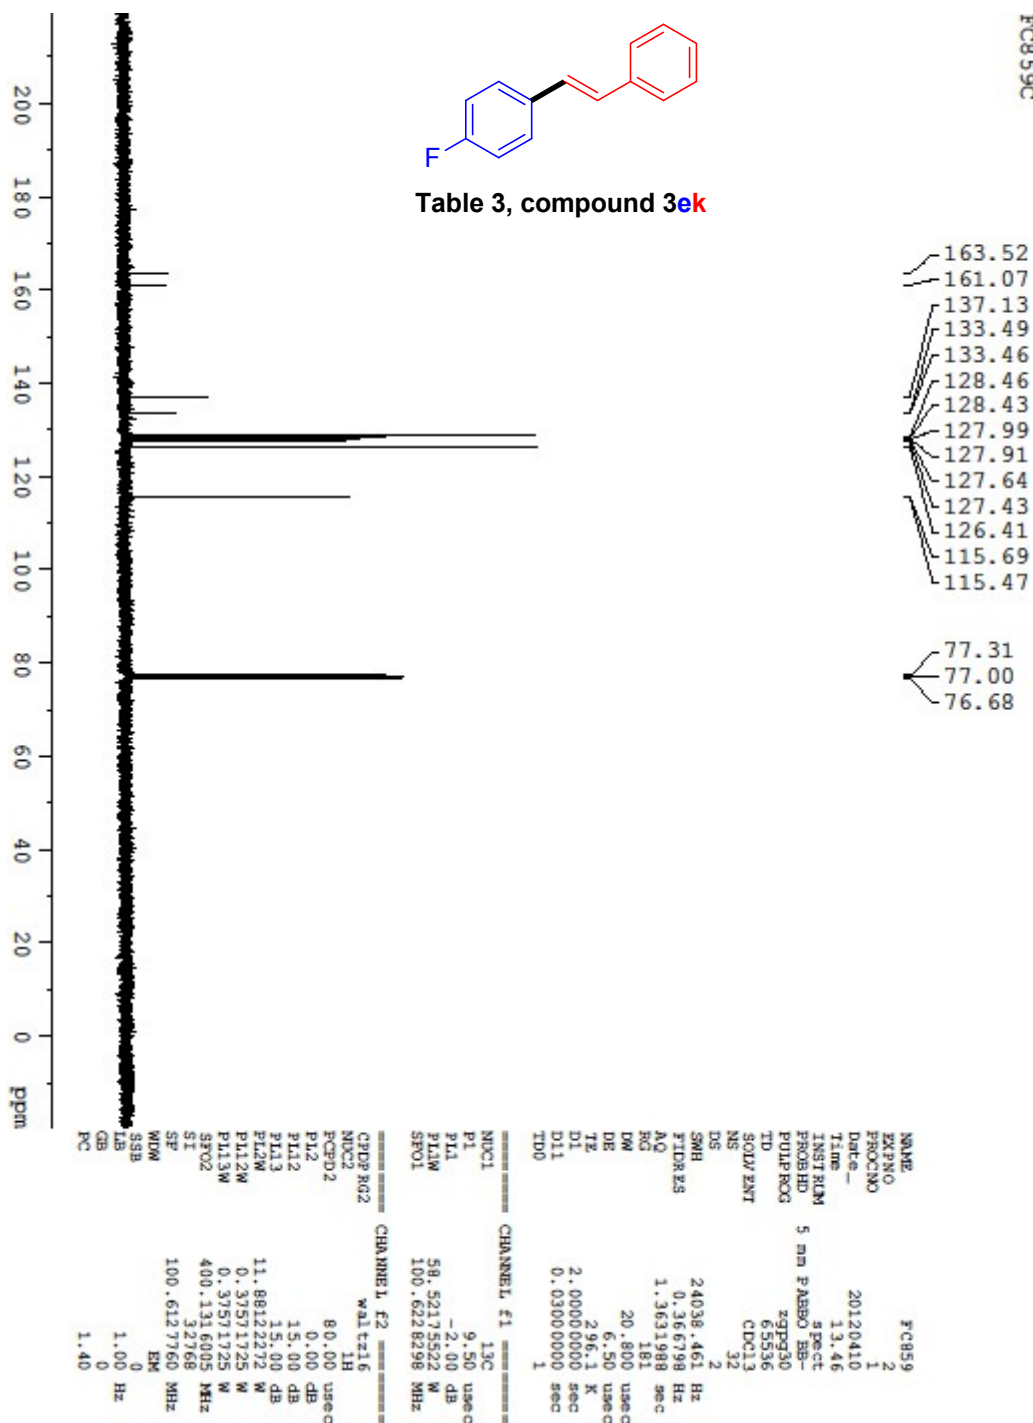

FC859F

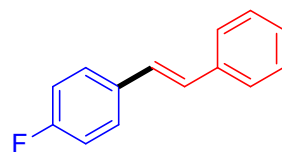

Table 3, compound 3ek

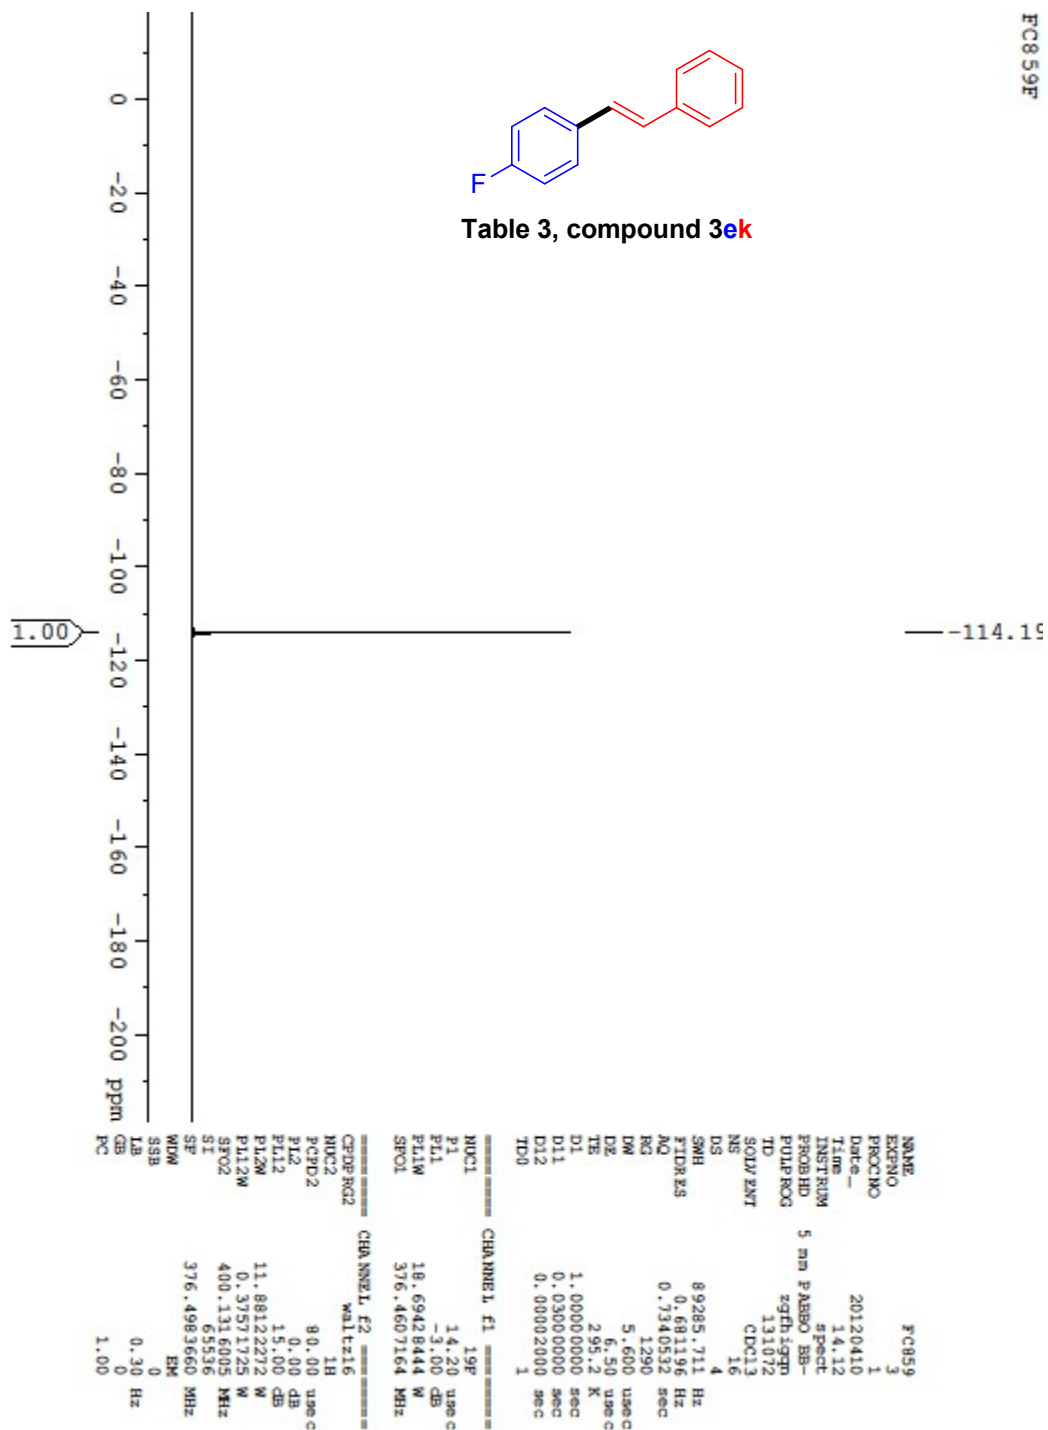

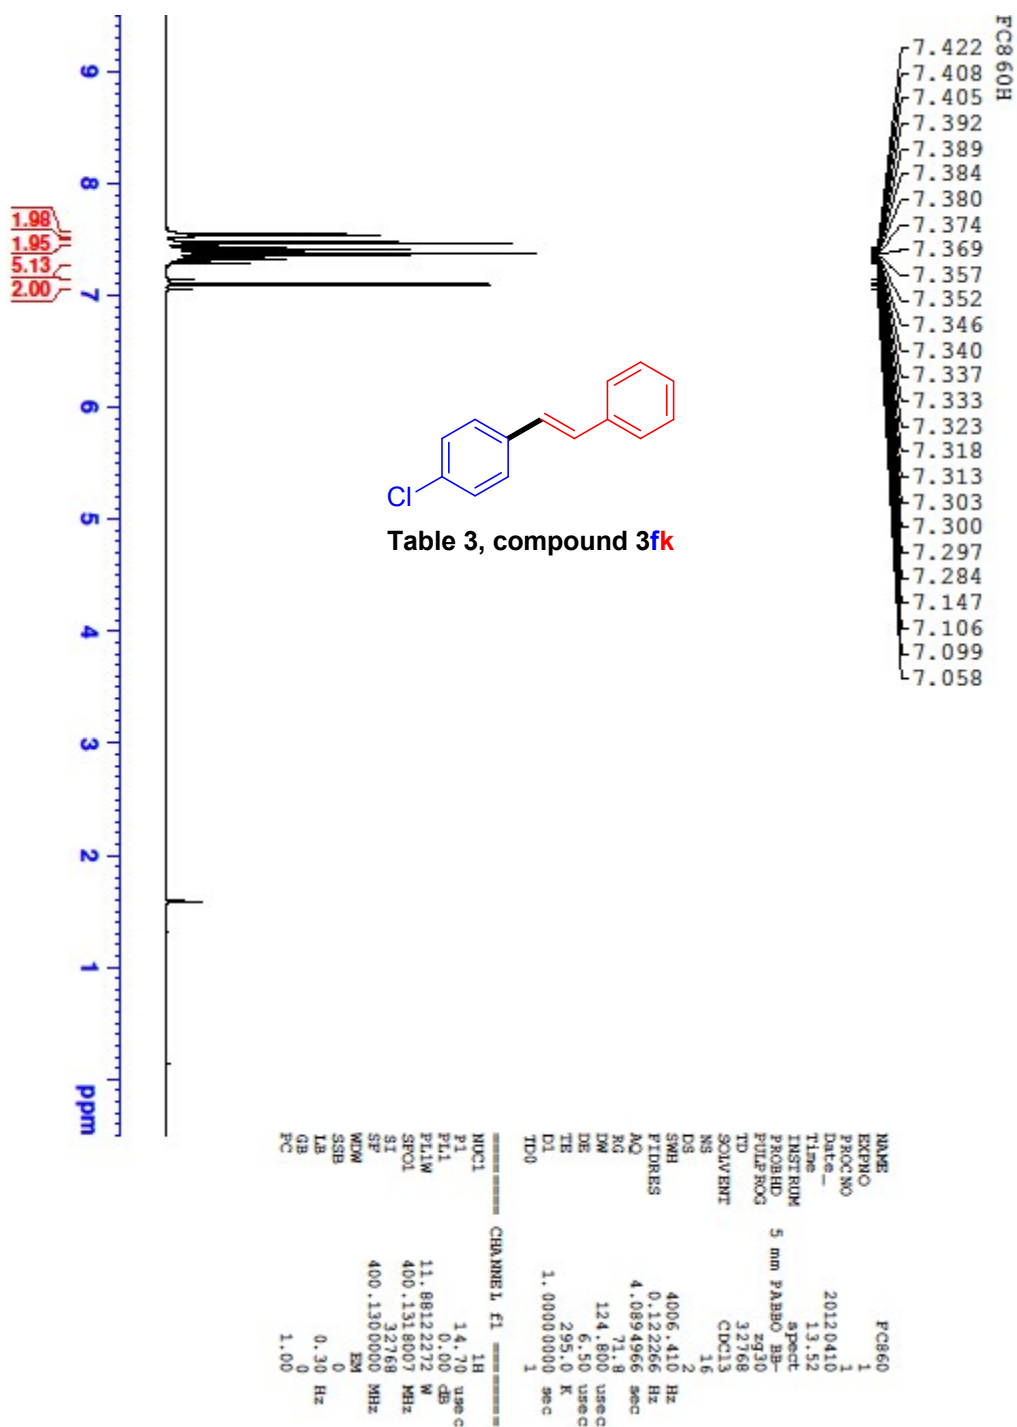

FC860C

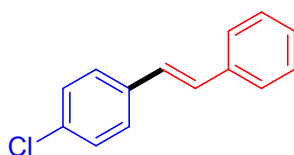

Table 3, compound 3fk

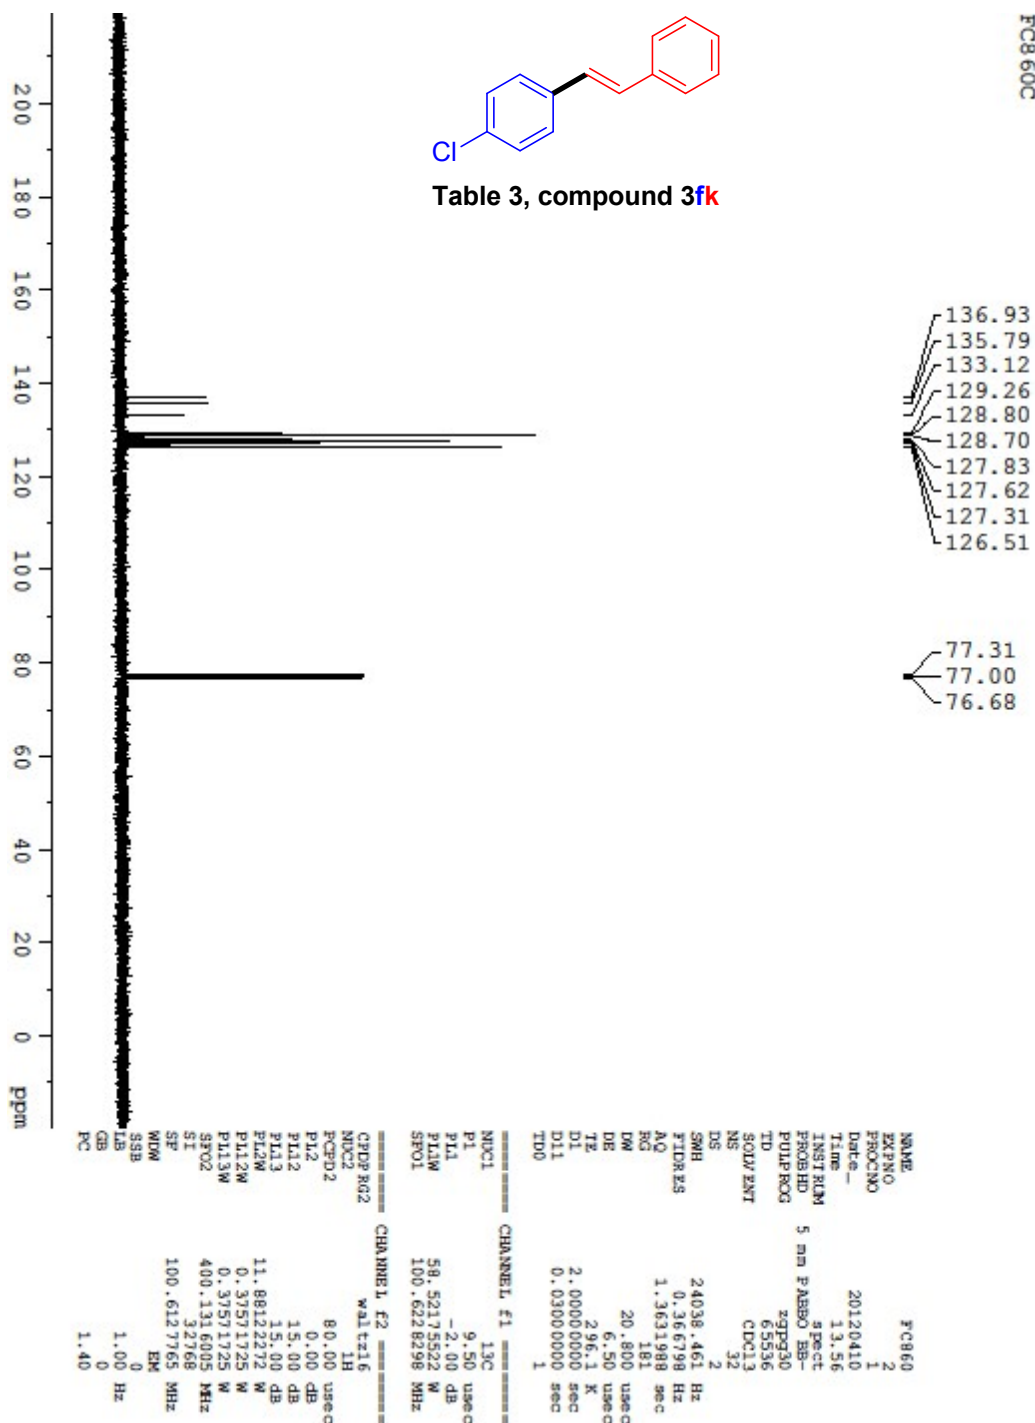

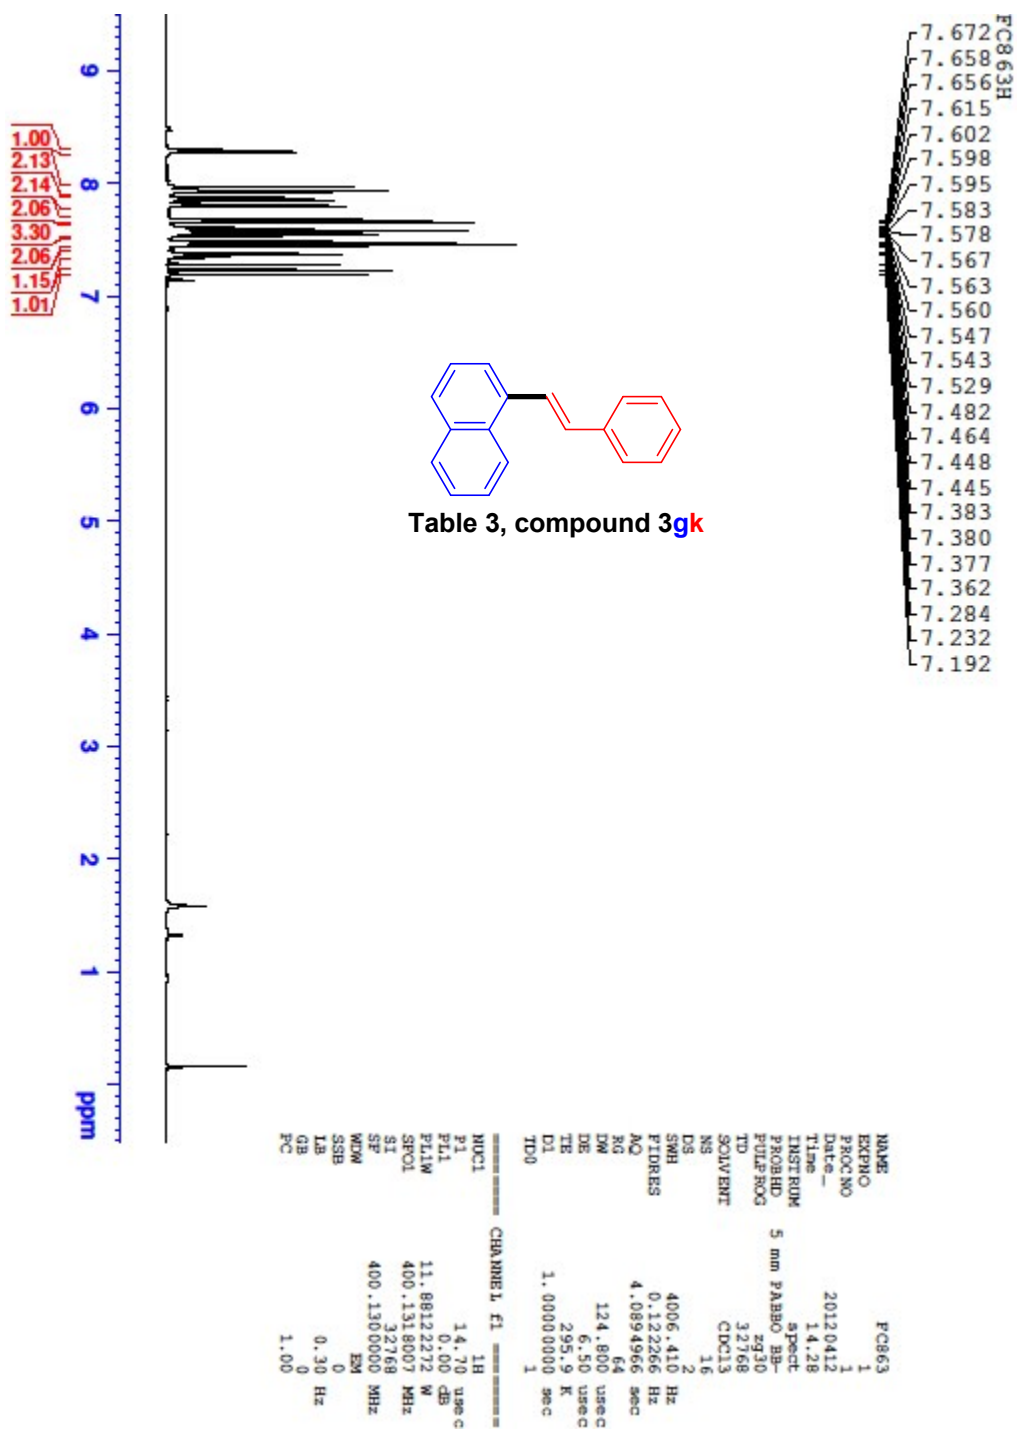

FC863C

137.57  
134.97  
133.68  
131.72  
131.36  
128.71  
128.58  
128.00  
127.74  
126.65  
126.05  
125.79  
125.76  
125.65  
123.73  
123.58  
77.30  
76.98  
76.66

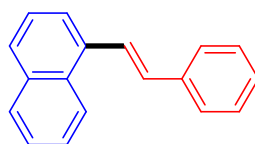

Table 3, compound 3gk

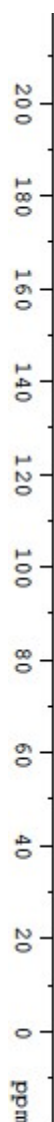

|         |                |
|---------|----------------|
| NAME    | FC863          |
| EXPNO   | 2              |
| PROCNO  | 1              |
| Date_   | 20120412       |
| Time    | 14.30          |
| INSTRUM | spect          |
| PROBHD  | 5 mm PABO BB-  |
| PULPROG | zgpg30         |
| TD      | 65536          |
| SOLVENT | CDCl3          |
| NS      | 32             |
| DS      | 2              |
| SWH     | 24038.461 Hz   |
| FIDRES  | 0.366798 Hz    |
| AQ      | 1.3631988 sec  |
| RG      | 101            |
| DW      | 20.800 usec    |
| DE      | 6.50 usec      |
| TE      | 296.8 K        |
| D1      | 2.00000000 sec |
| D11     | 0.03000000 sec |
| TD0     | 1              |

  

|                        |                        |
|------------------------|------------------------|
| ===== CHANNEL f1 ===== | ===== CHANNEL f2 ===== |
| NUC1                   | 13C                    |
| P1                     | 9.50 usec              |
| PL1                    | -2.00 dB               |
| PL1W                   | 58.52175522 W          |
| SFO1                   | 100.6228298 MHz        |

  

|                        |                        |
|------------------------|------------------------|
| ===== CHANNEL f2 ===== | ===== CHANNEL f3 ===== |
| CPDPRG2                | waltz16                |
| NUC2                   | 1H                     |
| PCPD2                  | 80.00 usec             |
| PL2                    | 0.00 dB                |
| PL12                   | 15.00 dB               |
| PL13                   | 15.00 dB               |
| PL1W                   | 11.88122272 W          |
| PL12W                  | 0.37571725 W           |
| PL13W                  | 0.37571725 W           |
| SFO2                   | 400.1316005 MHz        |
| SI                     | 32768                  |
| SP                     | 100.6127787 MHz        |
| WDW                    | EM                     |
| SSB                    | 0                      |
| LB                     | 1.00 Hz                |
| GB                     | 0                      |
| PC                     | 1.40                   |

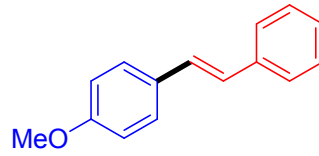

Table 3, compound 3hk

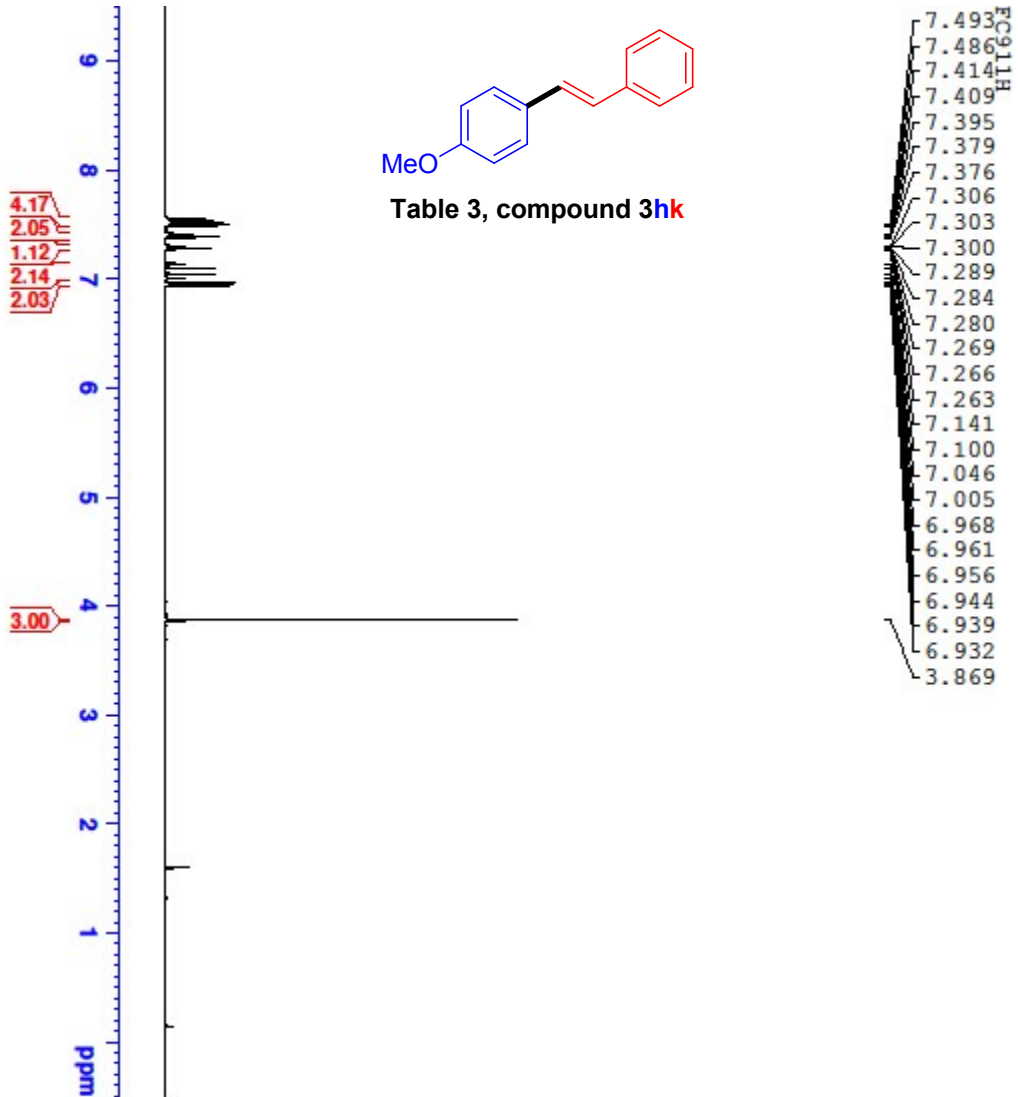

```

NAME          FC911
EXPNO         1
PROCNO        1
Date_         20120420
Time          17.39
INSTRUM       spect
PROBHD        5 mm PABBO BB-
PULPROG       zg30
TD            32768
SOLVENT       CDCl3
NS            16
DS            2
SWH            4006.410 Hz
FIDRES        0.122266 Hz
AQ            4.0894966 sec
RG            64
DE            124.800 usec
TE            298.4 K
D1            1.00000000 sec
TD0           1

===== CHANNEL f1 =====
NUC1           1H
P1            14.70 usec
PL1           0.00 dB
PL1W          11.8812272 W
SFO1          400.1318007 MHz
SI            32768
SF            400.1300000 MHz
WDW           EM
SSB           0
LB            0.30 Hz
GB            0
PC            1.00
  
```

COc1ccc(cc1)/C=C/c2ccccc2

FC911C

COc1ccc(C=Cc2ccccc2)cc1

Table 3, compound 3hk

159.30  
137.64  
130.14  
128.62  
128.21  
127.71  
127.19  
126.61  
126.24  
114.13  
77.34  
77.02  
76.70  
55.29

NAME FC911  
EXPNO 2  
PROCNO 1  
Date\_ 20120420  
Time 17.43  
INSTRUM spect  
PROBHD 5 mm PABBO BB-  
ZGPG40  
PULPROG zgpg30  
TD 65536  
SOLVENT CDCl3  
NS 32  
DS 2  
SWH 24038.461 Hz  
FIDRES 0.366798 Hz  
AQ 1.3631988 sec  
RG 203  
DW 20.800 usec  
DE 6.50 usec  
TE 299.5 K  
D1 2.00000000 sec  
D11 0.03000000 sec  
TD0 1

CHXNMR1 F1 13C  
NUC1 13C  
P1 9.50 usec  
PL1 -2.00 dB  
PL1W 58.52175522 W  
SFO1 100.6228298 MHz

CHXNMR1 F2 1H  
CPDPRG2 waltz16  
NUC2 1H  
PCPD2 80.00 usec  
PL2 0.00 dB  
PL12 15.00 dB  
PL13 15.00 dB  
PL1W 11.88122272 W  
PL12W 0.37571725 W  
PL13W 0.37571725 W  
SFO2 400.1316005 MHz  
SI 32768  
SF 100.6127743 MHz  
WDW EM  
SSB 0  
LB 1.00 Hz  
GB 0  
PC 1.40

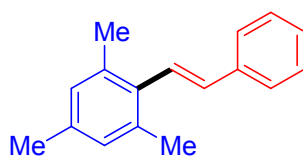

Table 3, compound 3ik

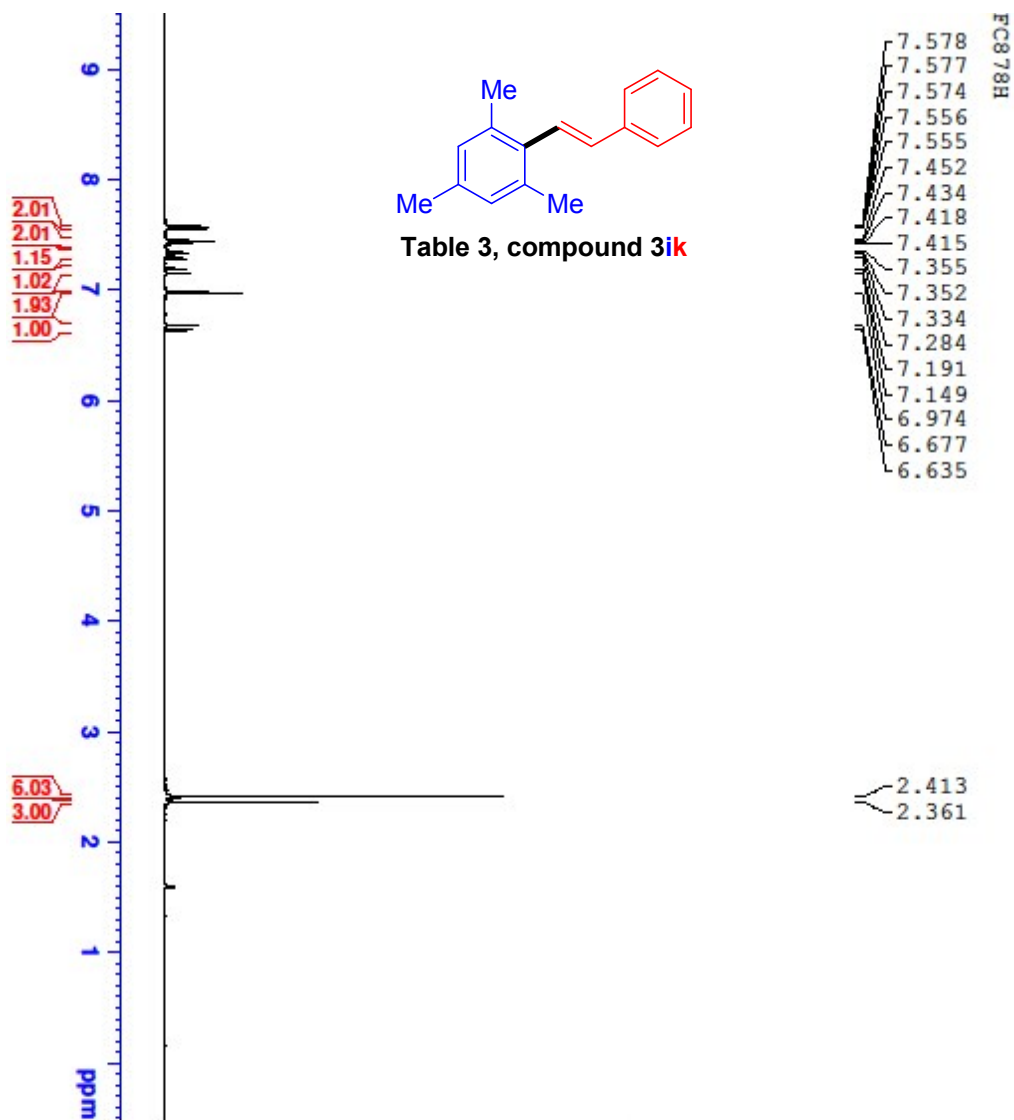

```

NAME          FC878
EXPNO         1
PROCNO        1
Date_         20120412
Time          14.21
INSTRUM       spect
PROBHD        5 mm PABBO BB-
PULPROG       zg30
TD            32768
SOLVENT       CDCl3
NS            16
DS            2
SWH            4006.410 Hz
FIDRES        0.122266 Hz
AQ            4.0894966 sec
RG            64
DW            124.800 usec
DE            6.50 usec
TE            295.9 K
D1            1.0000000 sec
TD0           1

===== CHANNEL f1 =====
NUC1           1H
P1            14.70 usec
PL1           0.00 dB
PL1W          11.8812272 W
SFO1          400.1318007 MHz
SI            32768
SF            400.1300000 MHz
WDW           EM
SSB            0
LB            0.30 Hz
GB            0
PC            1.00
  
```

137.67  
136.23  
136.08  
133.91  
133.55  
128.64  
128.57  
127.37  
126.84  
126.15

77.27  
76.95  
76.63

20.93  
20.90

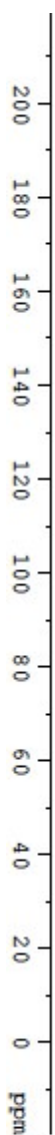

| NAME    | FC878          |
|---------|----------------|
| EXPNO   | 2              |
| PROCNO  | 1              |
| Date_   | 20120412       |
| Time    | 14.24          |
| INSTRUM | 3spec          |
| PROBHD  | 5 mm PABBO BB- |
| PULPROG | zgpg30         |
| TD      | 65336          |
| SCALERT | CDCL3          |
| NS      | 32             |
| DS      | 2              |
| SWH     | 24038.461 Hz   |
| FIDRES  | 0.366798 Hz    |
| AQ      | 1.3631988      |
| RG      | 101            |
| FW      | 20.800         |
| TM      | 6.50           |
| DE      | 296.9          |
| TE      | 2.00000000 sec |
| D1      | 0.03000000 sec |
| D11     | 1              |
| TDO     |                |

  

| CHANDEL F1 | CHANDEL F2      |
|------------|-----------------|
| NUC1       | 13C             |
| P1         | 9.50 usec       |
| PL1        | -2.00 dB        |
| PL1W       | 58.52175522 W   |
| SFO1       | 100.6228298 MHz |
| CPDPRG2    | Waltz16         |
| NUC2       | 1H              |
| P2         | 80.00 usec      |
| PL2        | 0.00 dB         |
| PL12       | 15.00 dB        |
| PL13       | 1.50 dB         |
| PL12W      | 11.88122272 W   |
| PL12W      | 0.37571125 W    |
| SFO2       | 400.1316005 MHz |
| SI         | 32768           |
| WTR        | 100.6127815 MHz |
| SSB        | EM              |
| GB         | 0               |
| PC         | 1.40            |

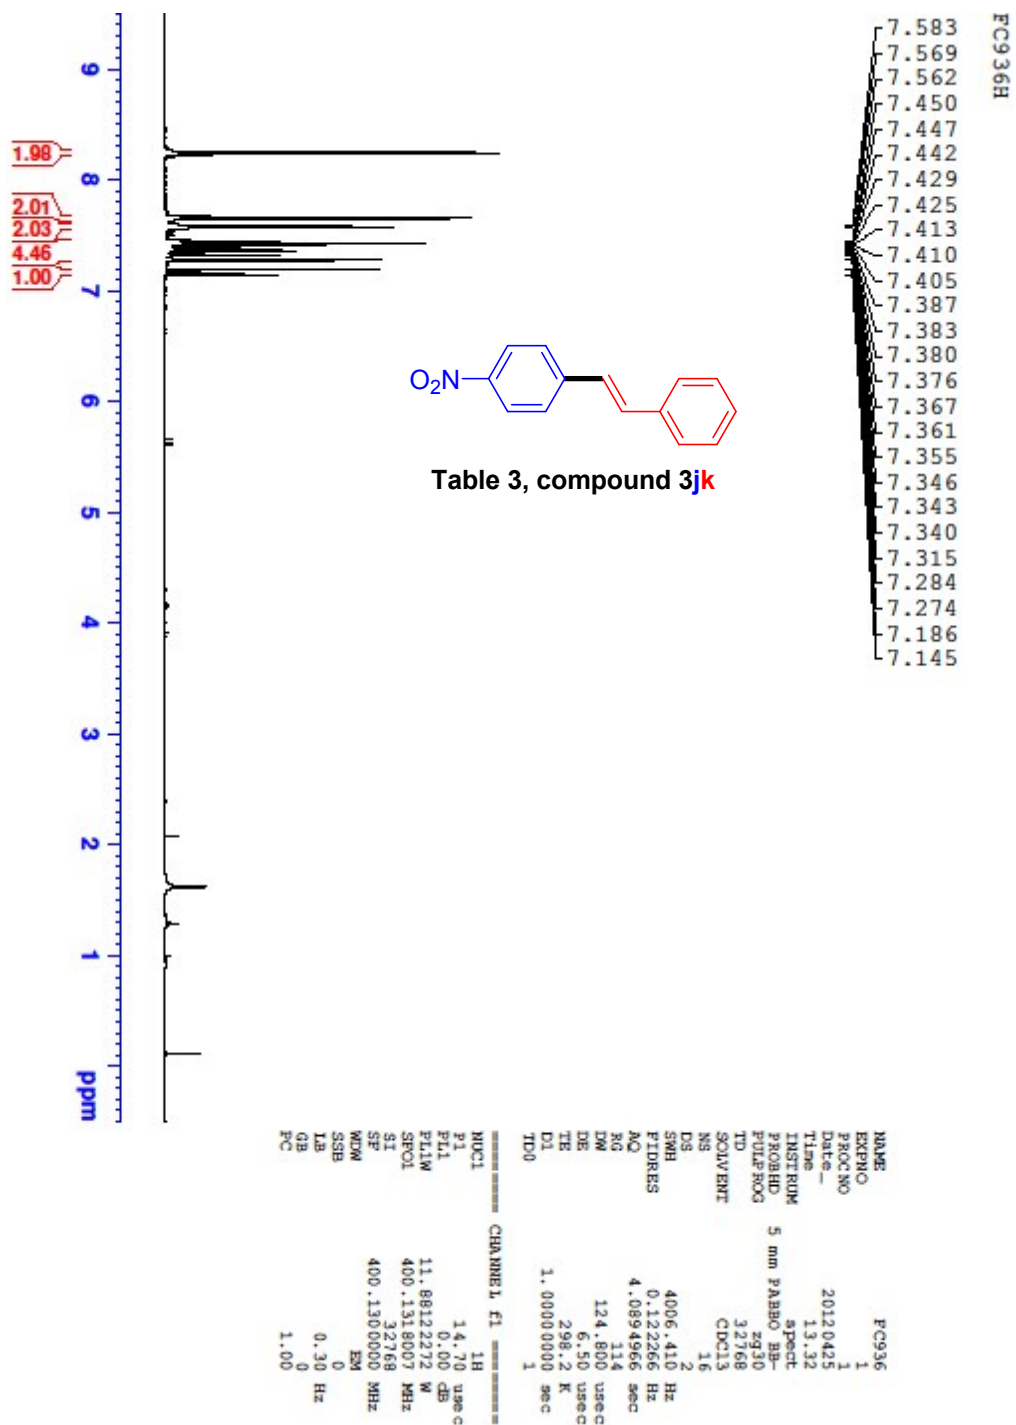

FC936C

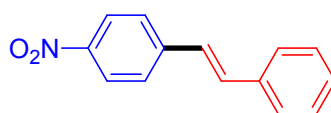

Table 3, compound 3jk

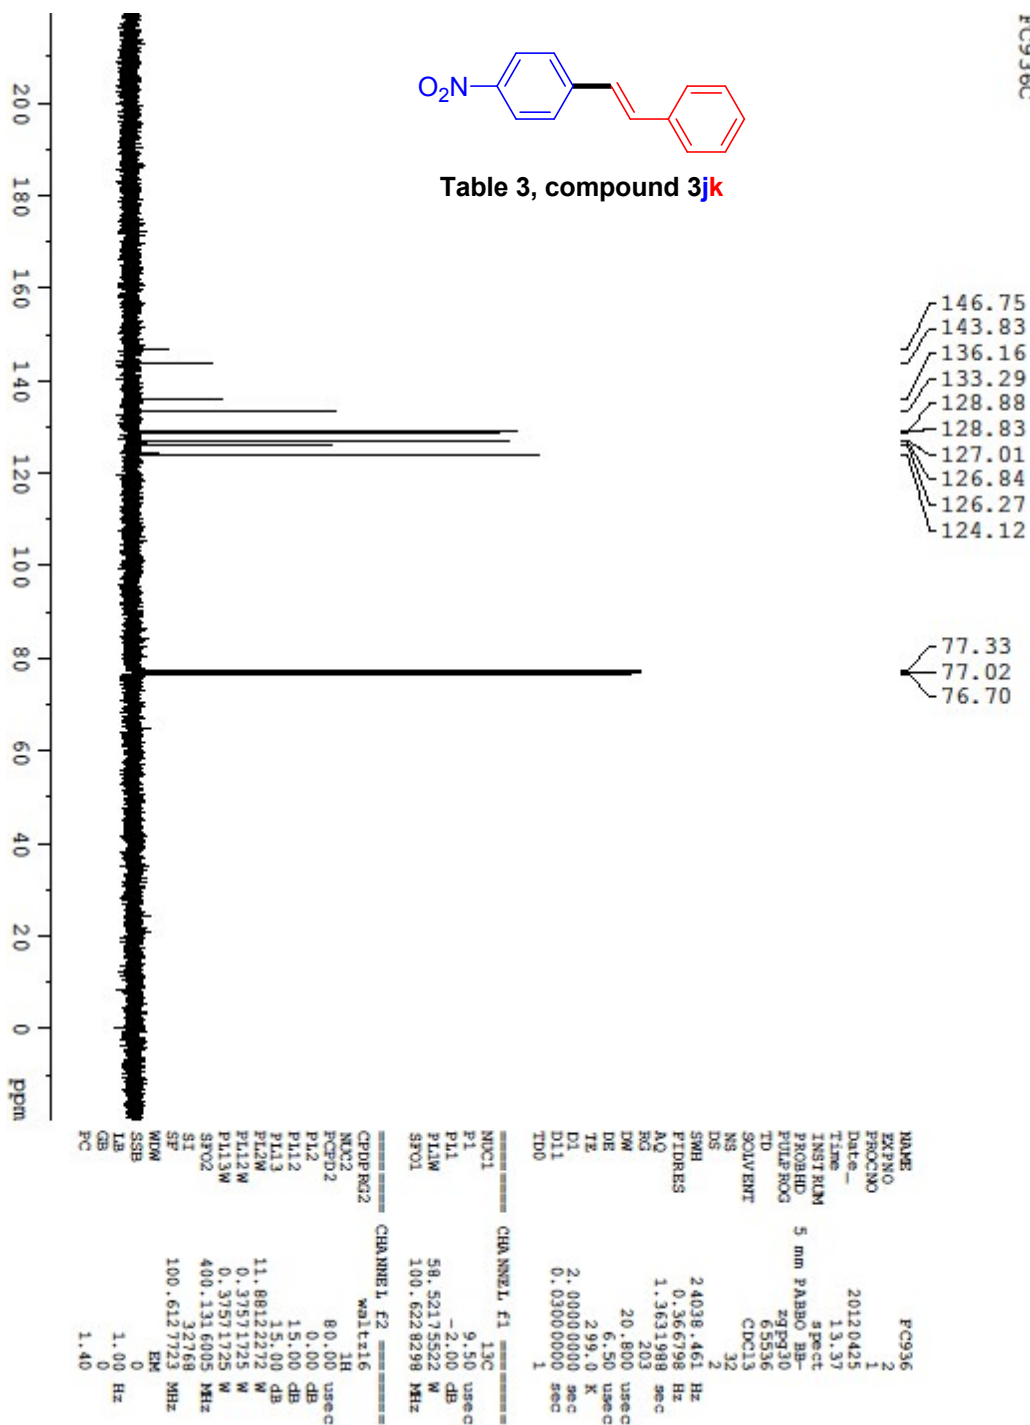

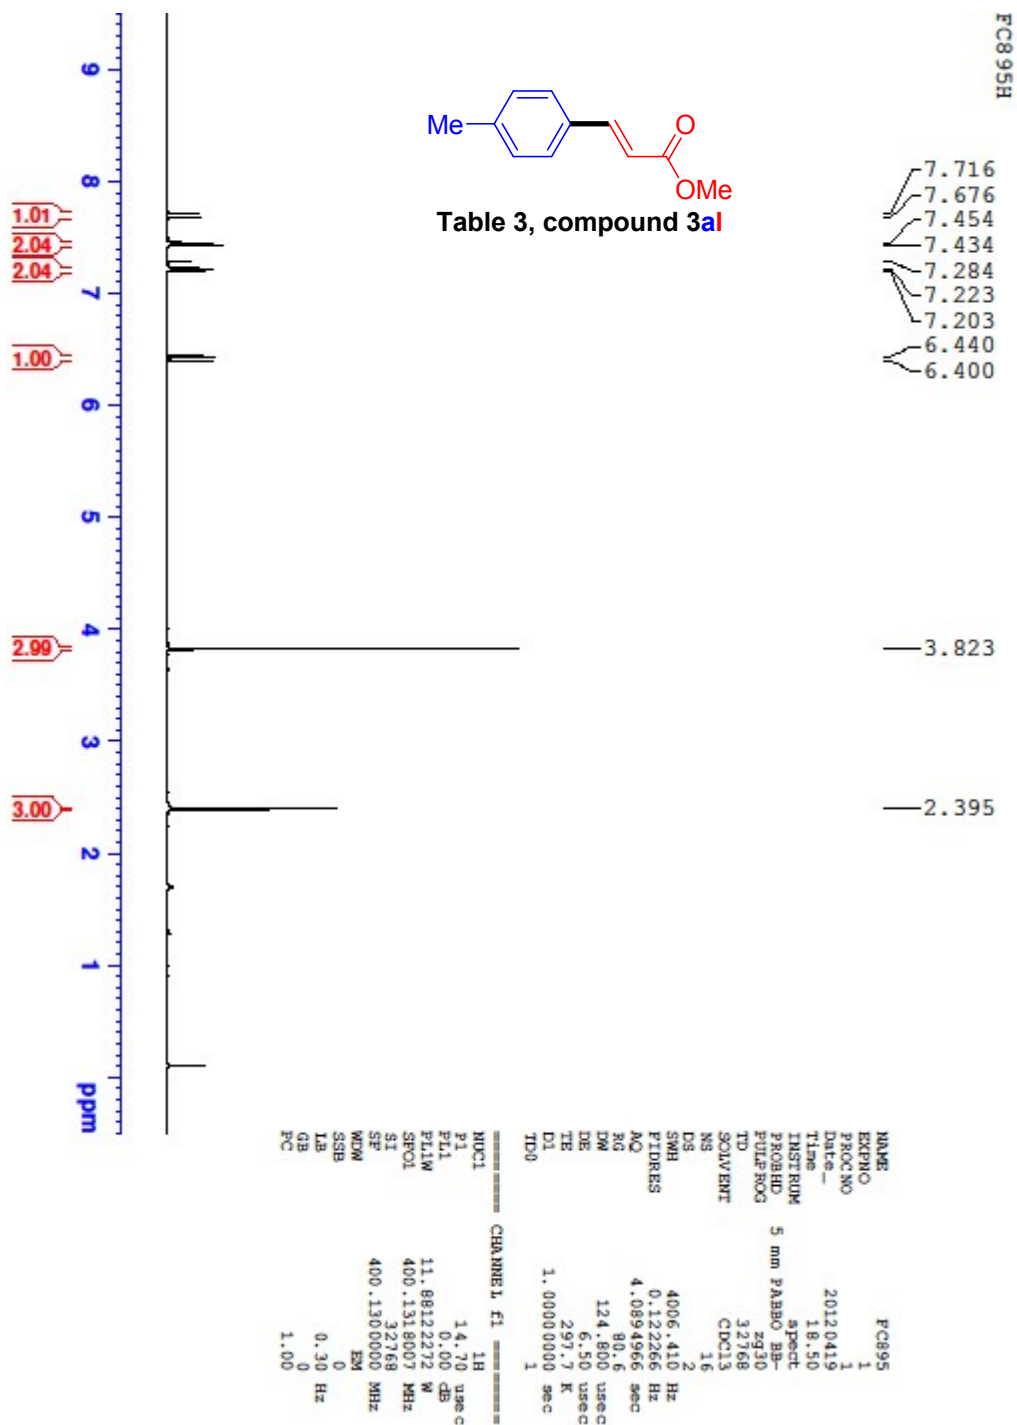

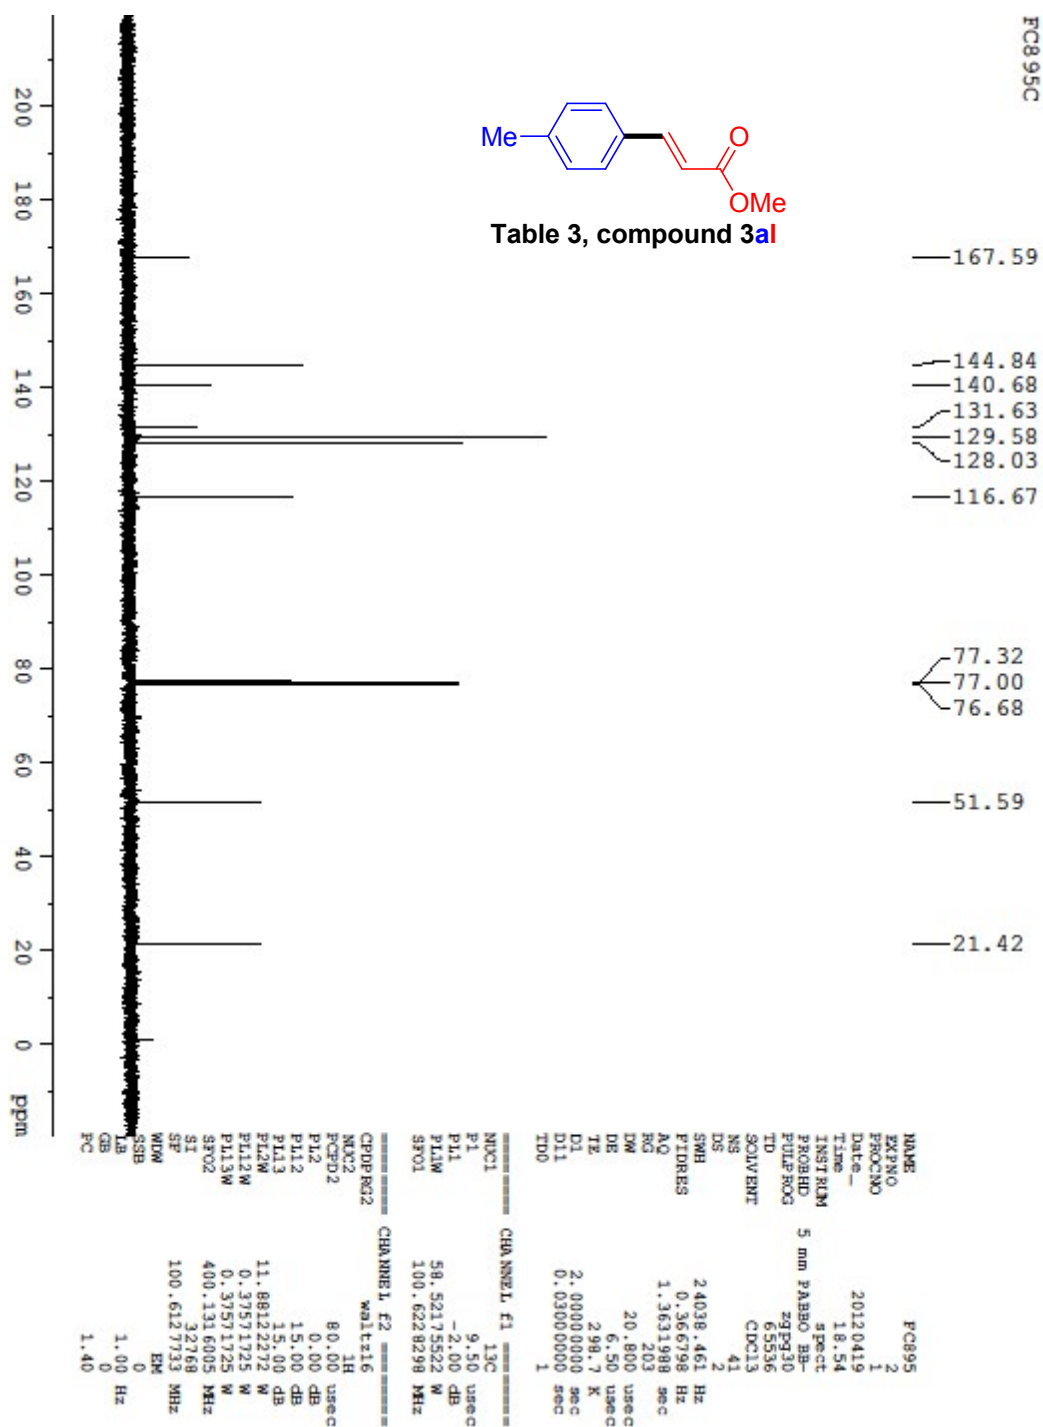

FC907H

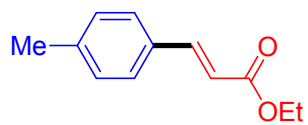

Table 3, compound 3am

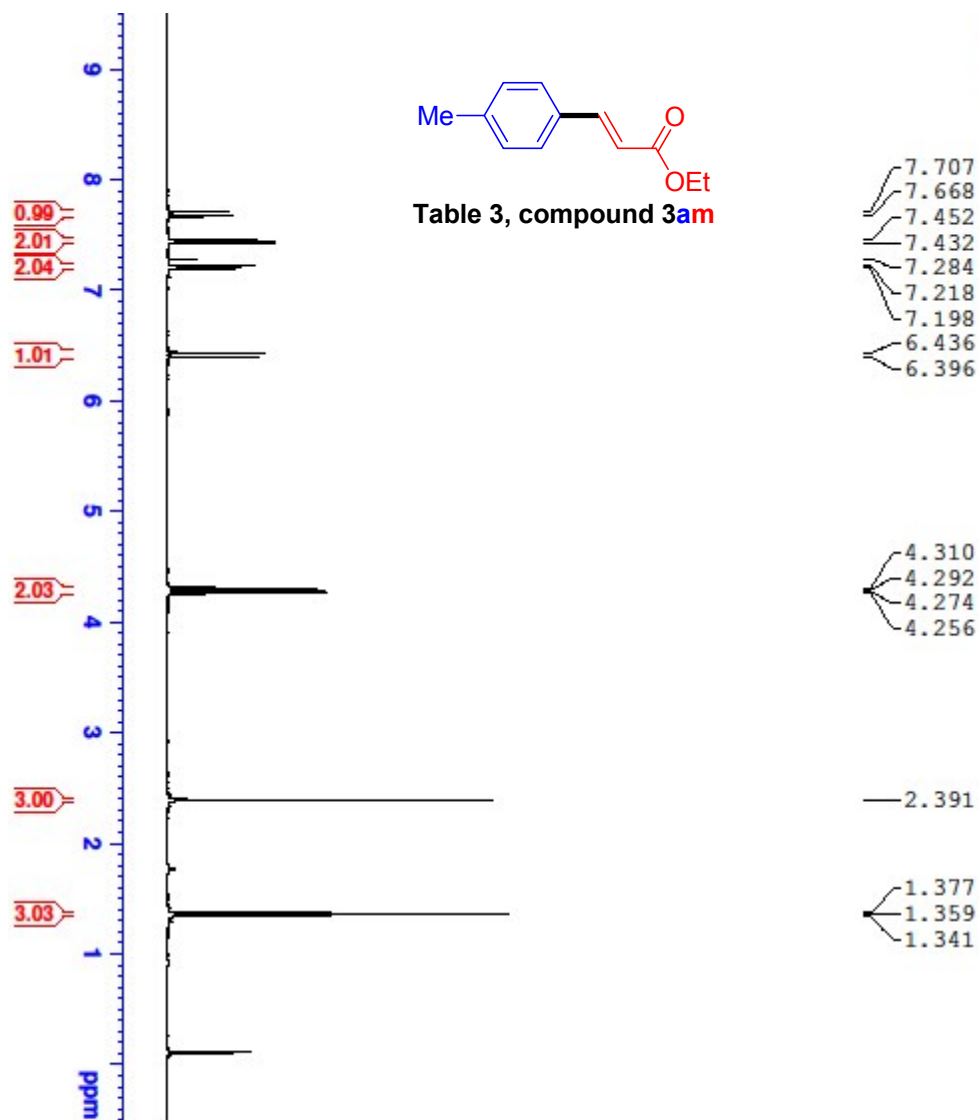

```

NAME          FC907
EXPNO         1
PROCNO        1
Date_         20120419
Time          18.36
INSTRUM       spect
PROBHD        5 mm PABBO BB-
PULPROG       zg30
TD            32768
SOLVENT       CDCl3
NS            16
DS            2
SWH            4006.410 Hz
FIDRES        0.122266 Hz
AQ            4.0894966 sec
RG            45.2
DE            124.800 usec
TE            297.7 K
D1            1.00000000 sec
TD0           1

===== CHANNEL f1 =====
NUC1           1H
P1            14.70 usec
PL1           0.00 dB
PL1W          11.8812272 W
SFO1          400.1318007 MHz
SI            32768
SF            400.1300000 MHz
WDW           EM
SSB           0
LB            0.30 Hz
GB            0
PC            1.00
  
```

FC907C

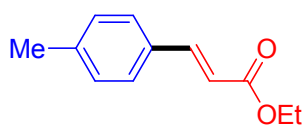

Table 3, compound 3am

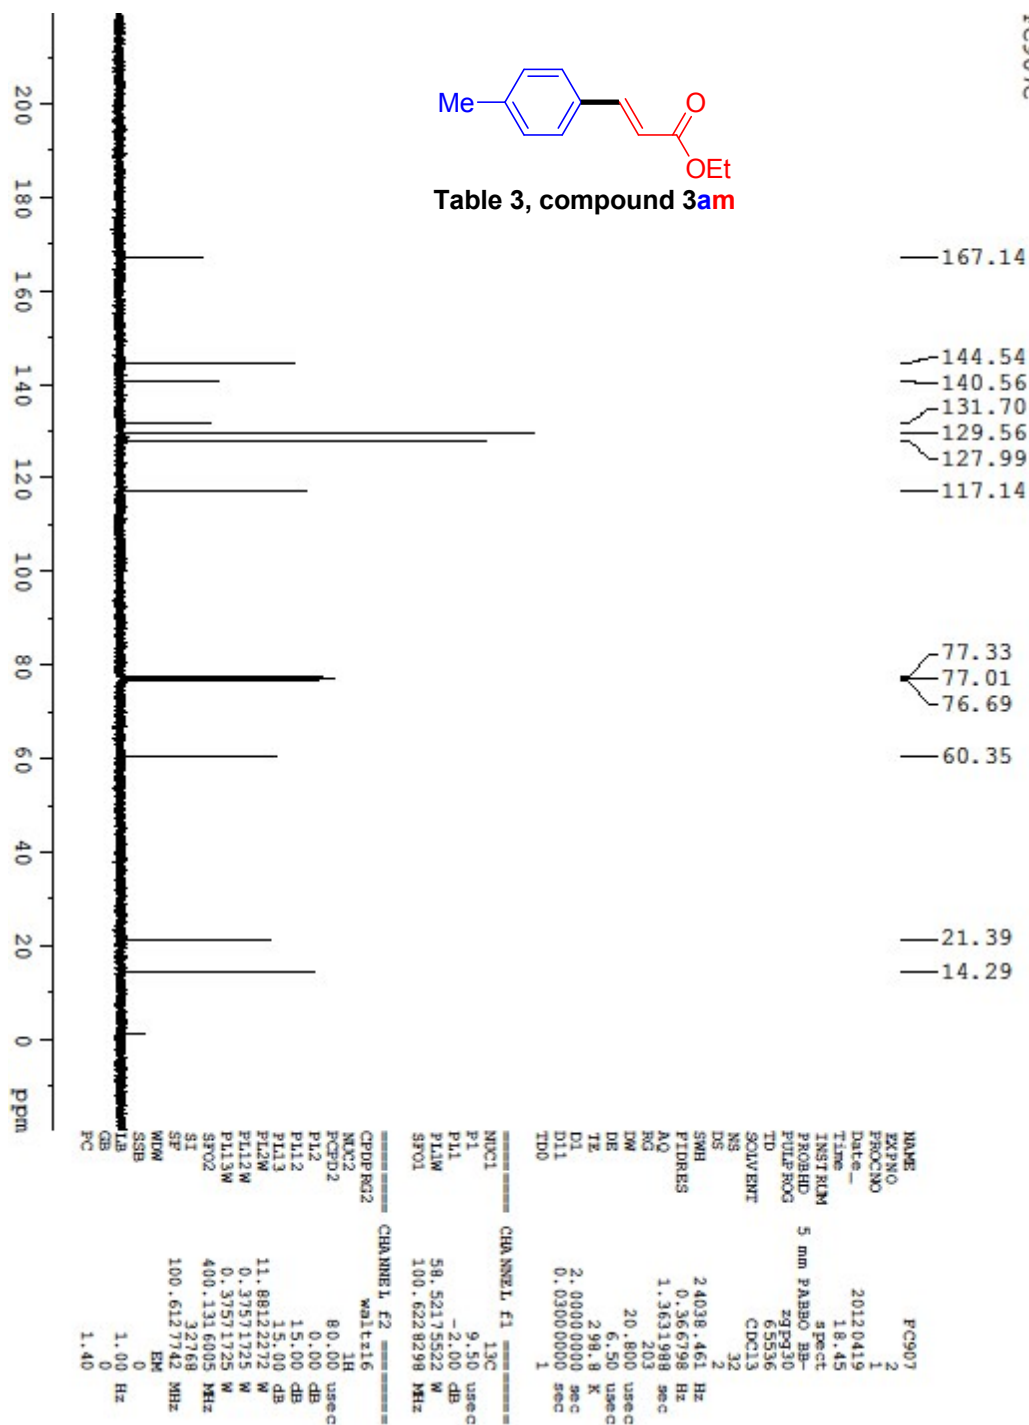

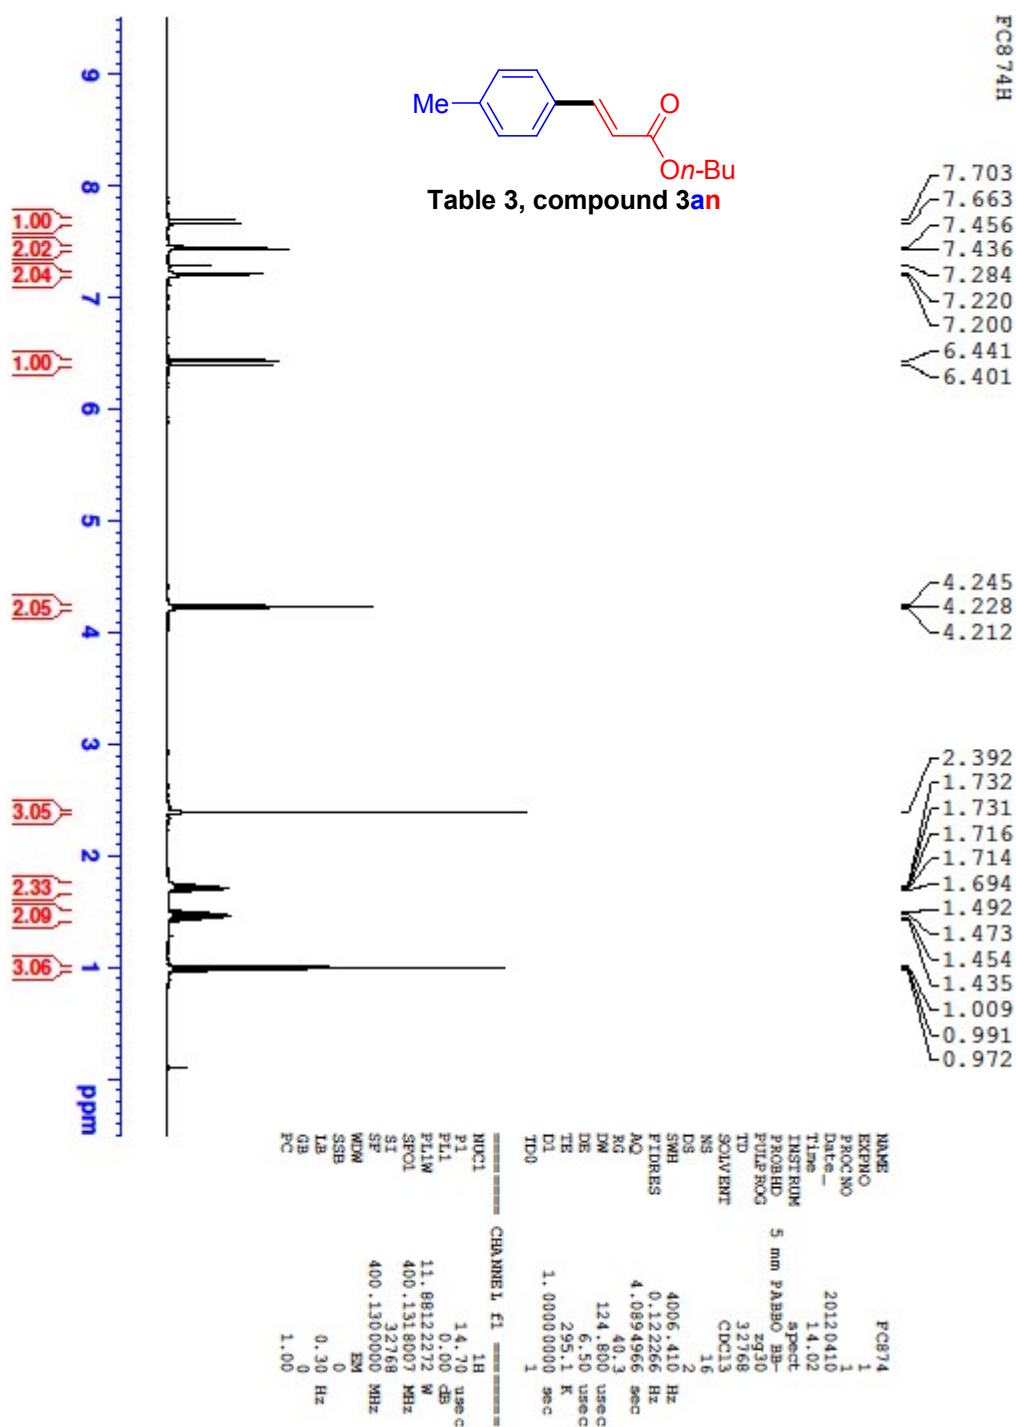

FC874C

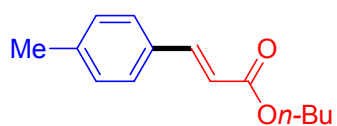

Table 3, compound 3an

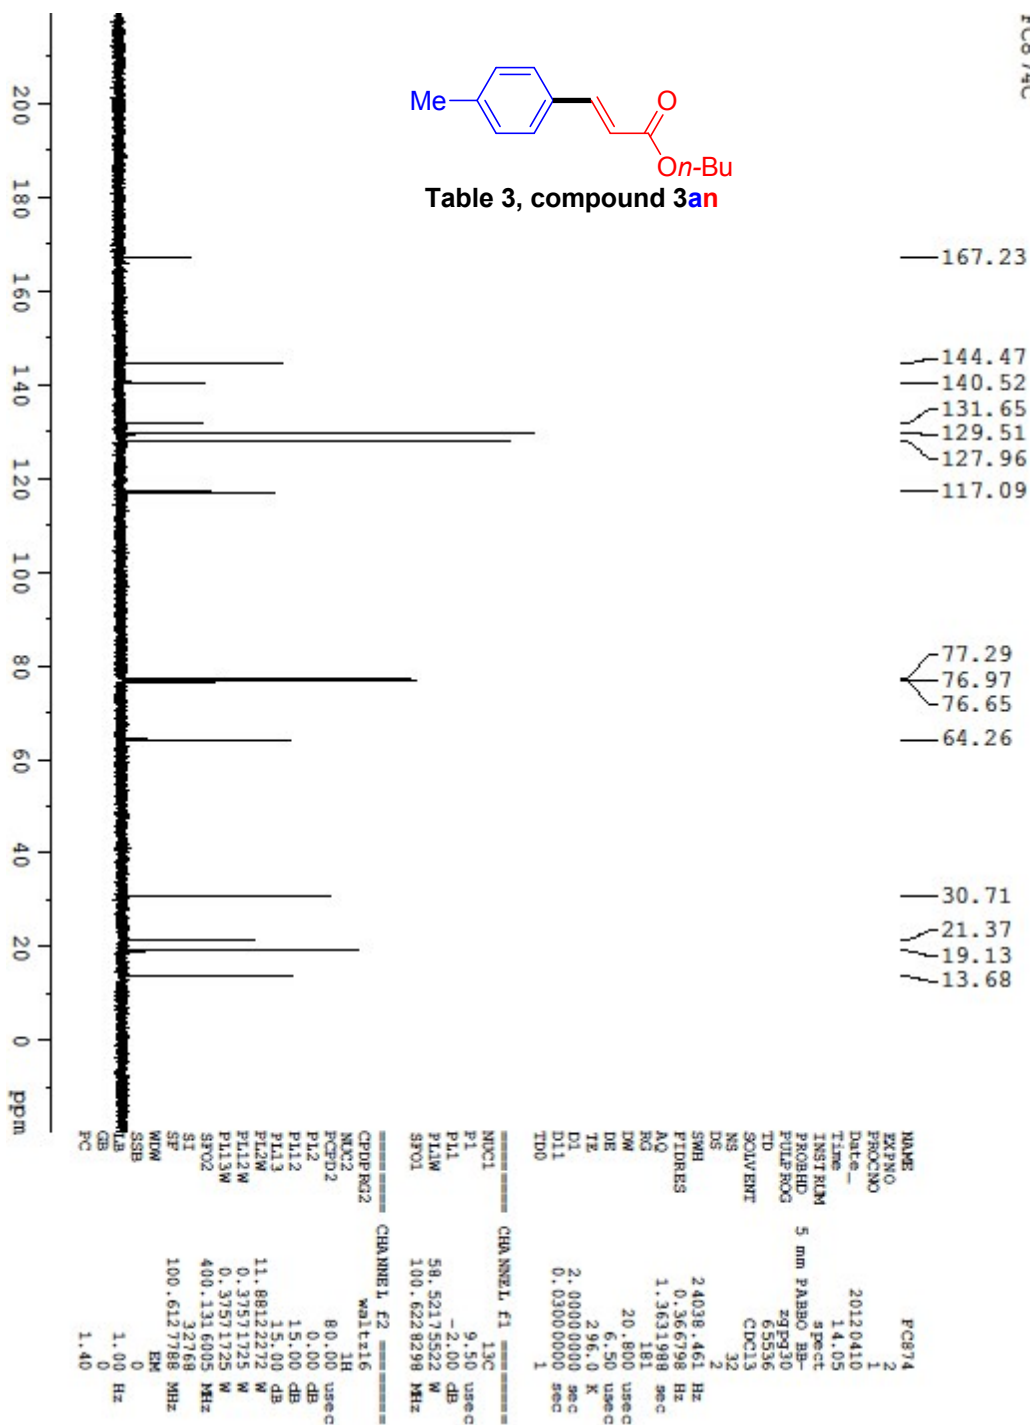

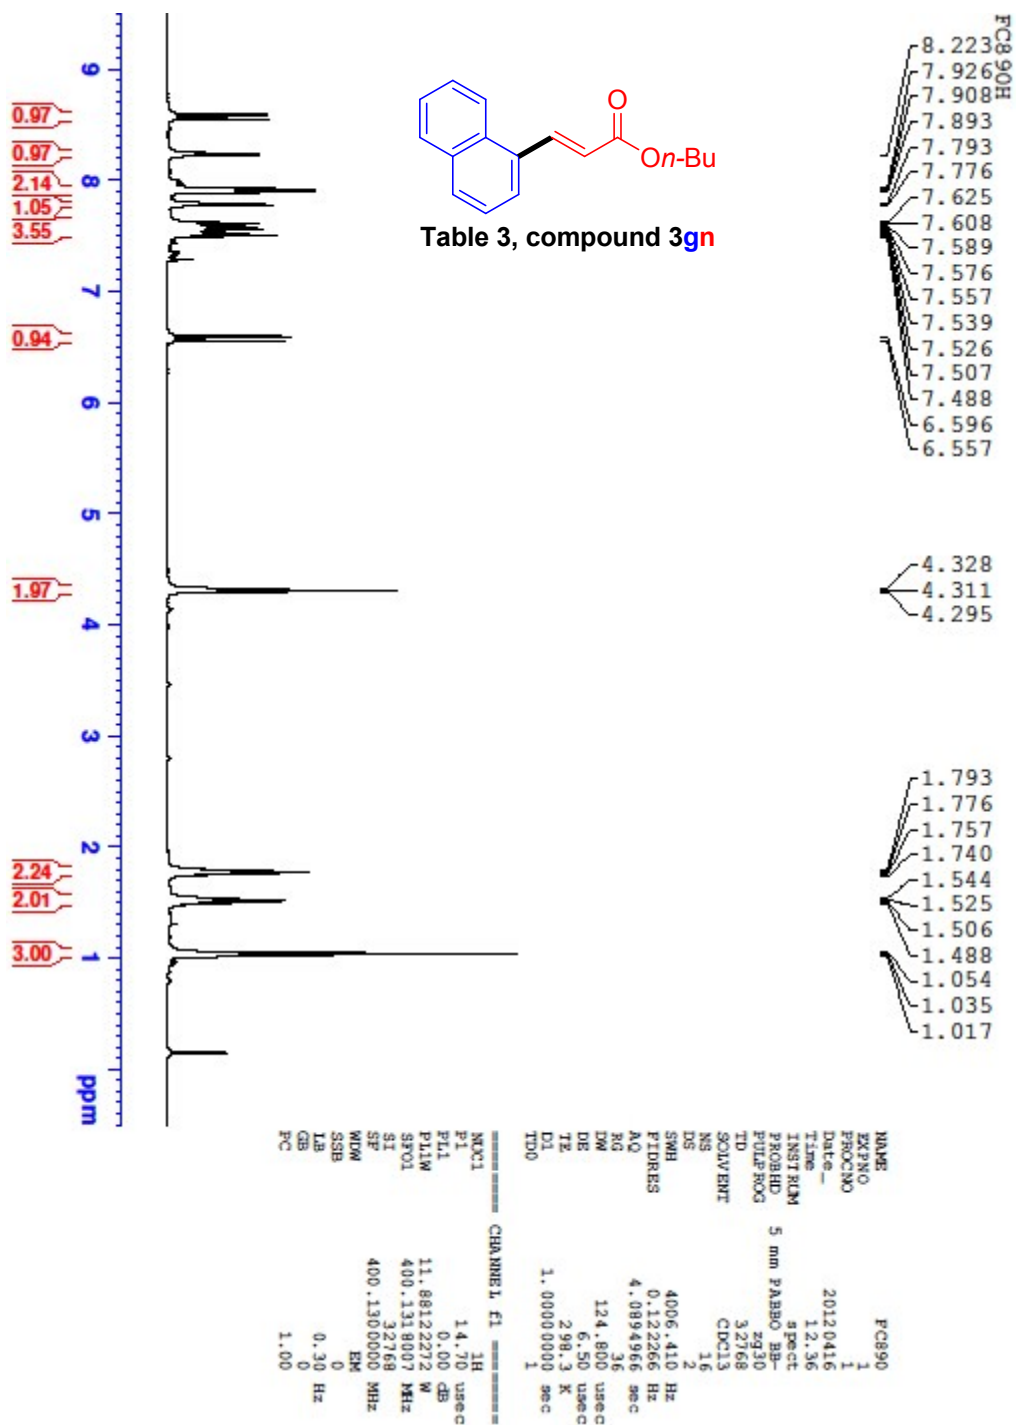

FC890C

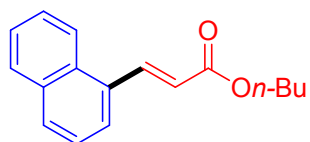

Table 3, compound 3gn

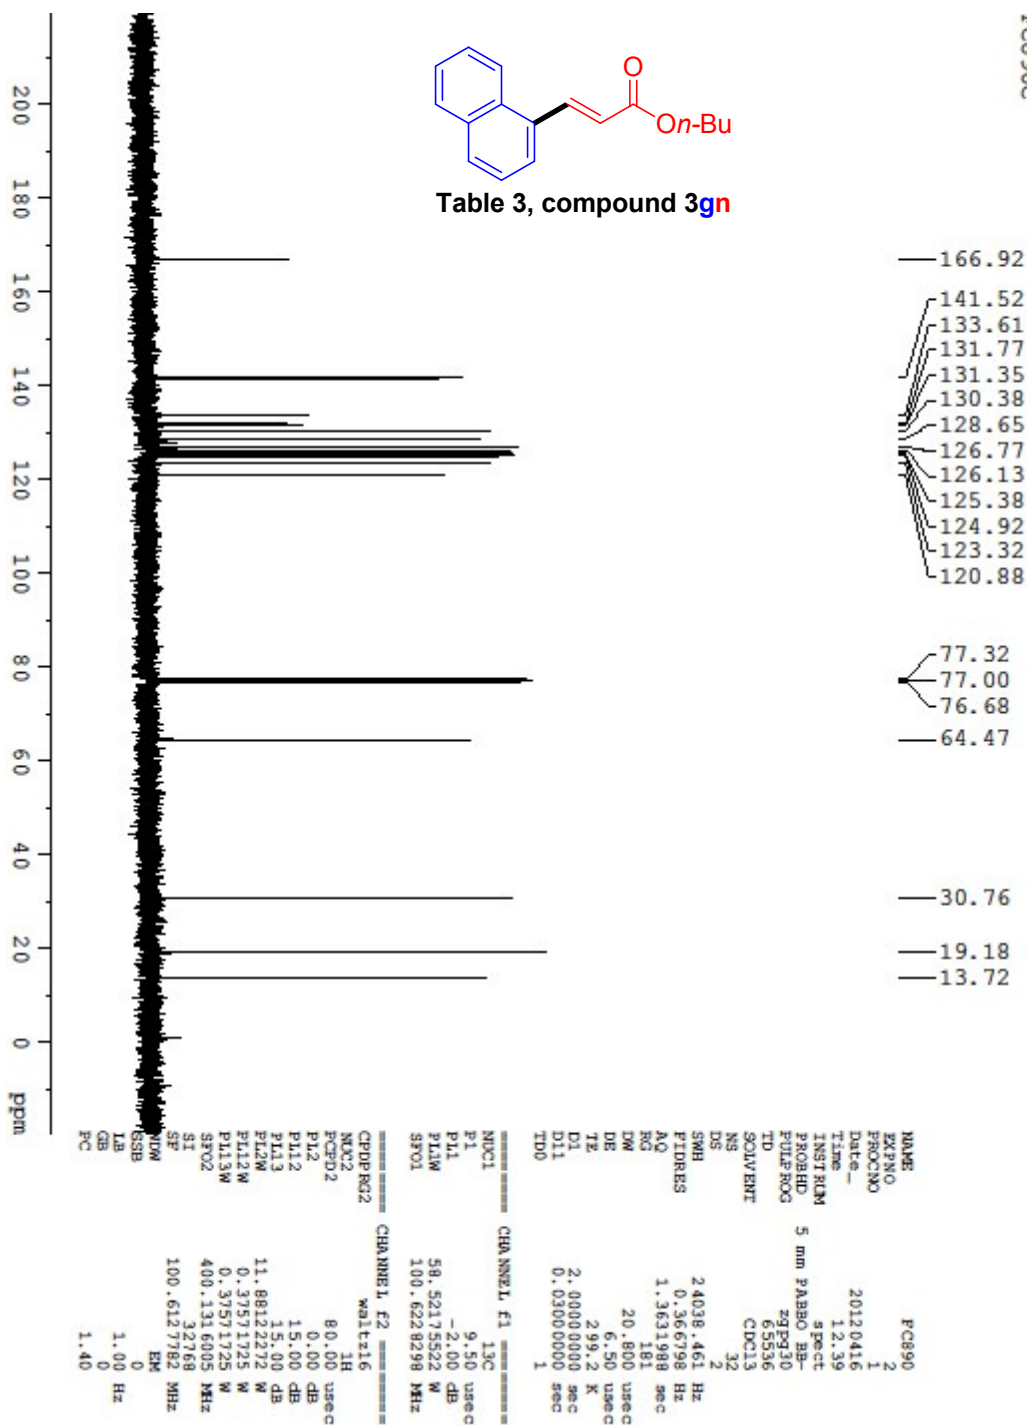

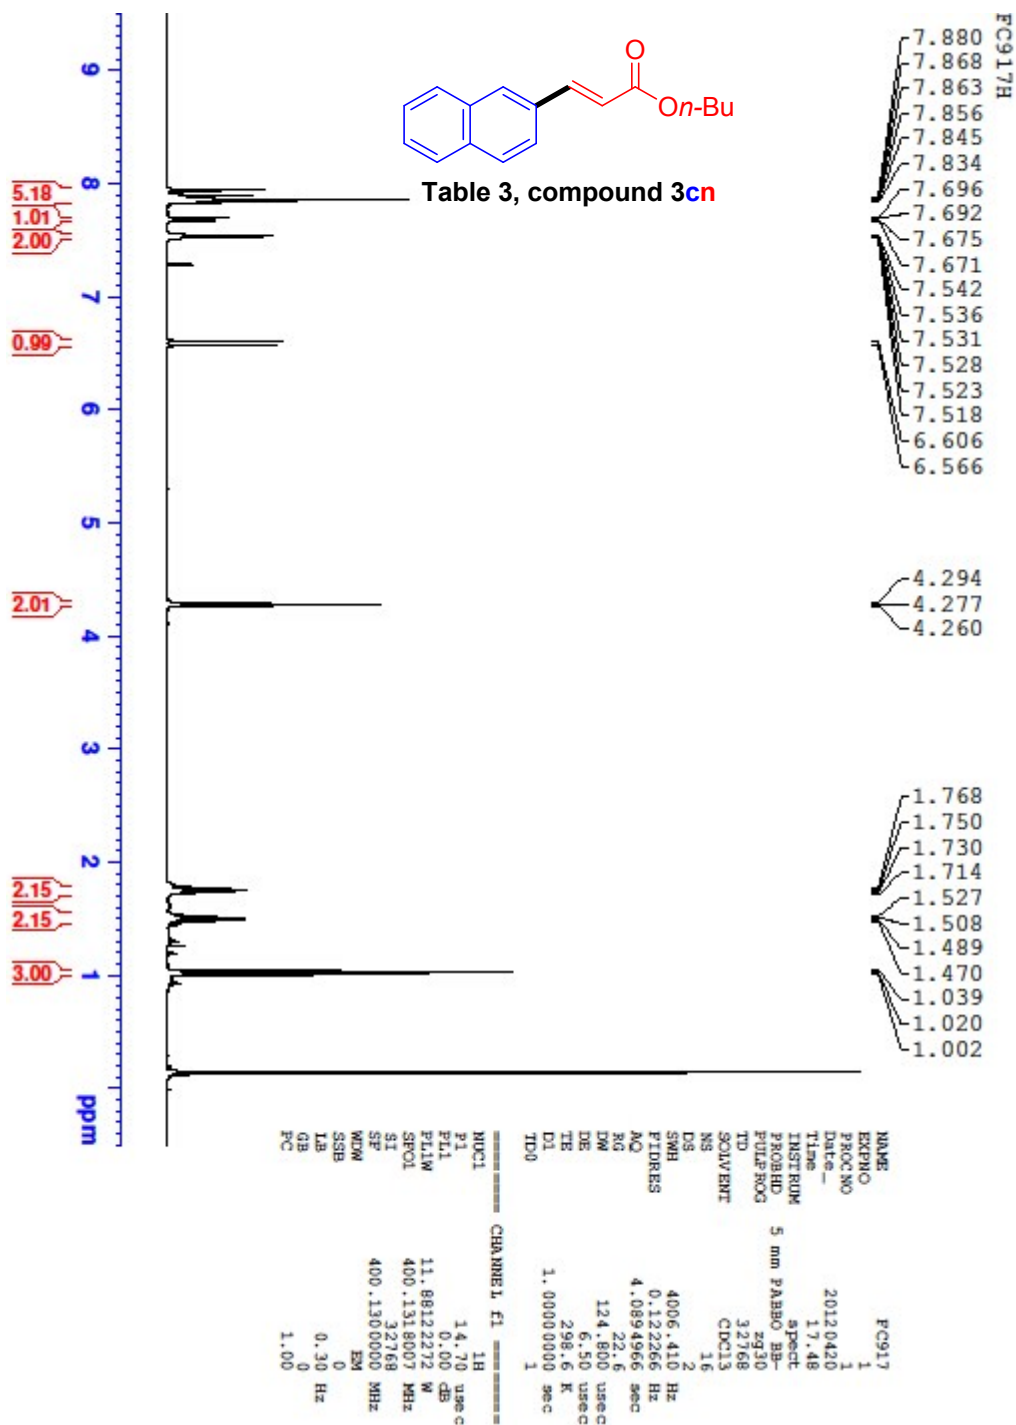

FC917C

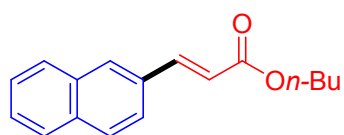

Table 3, compound 3cn

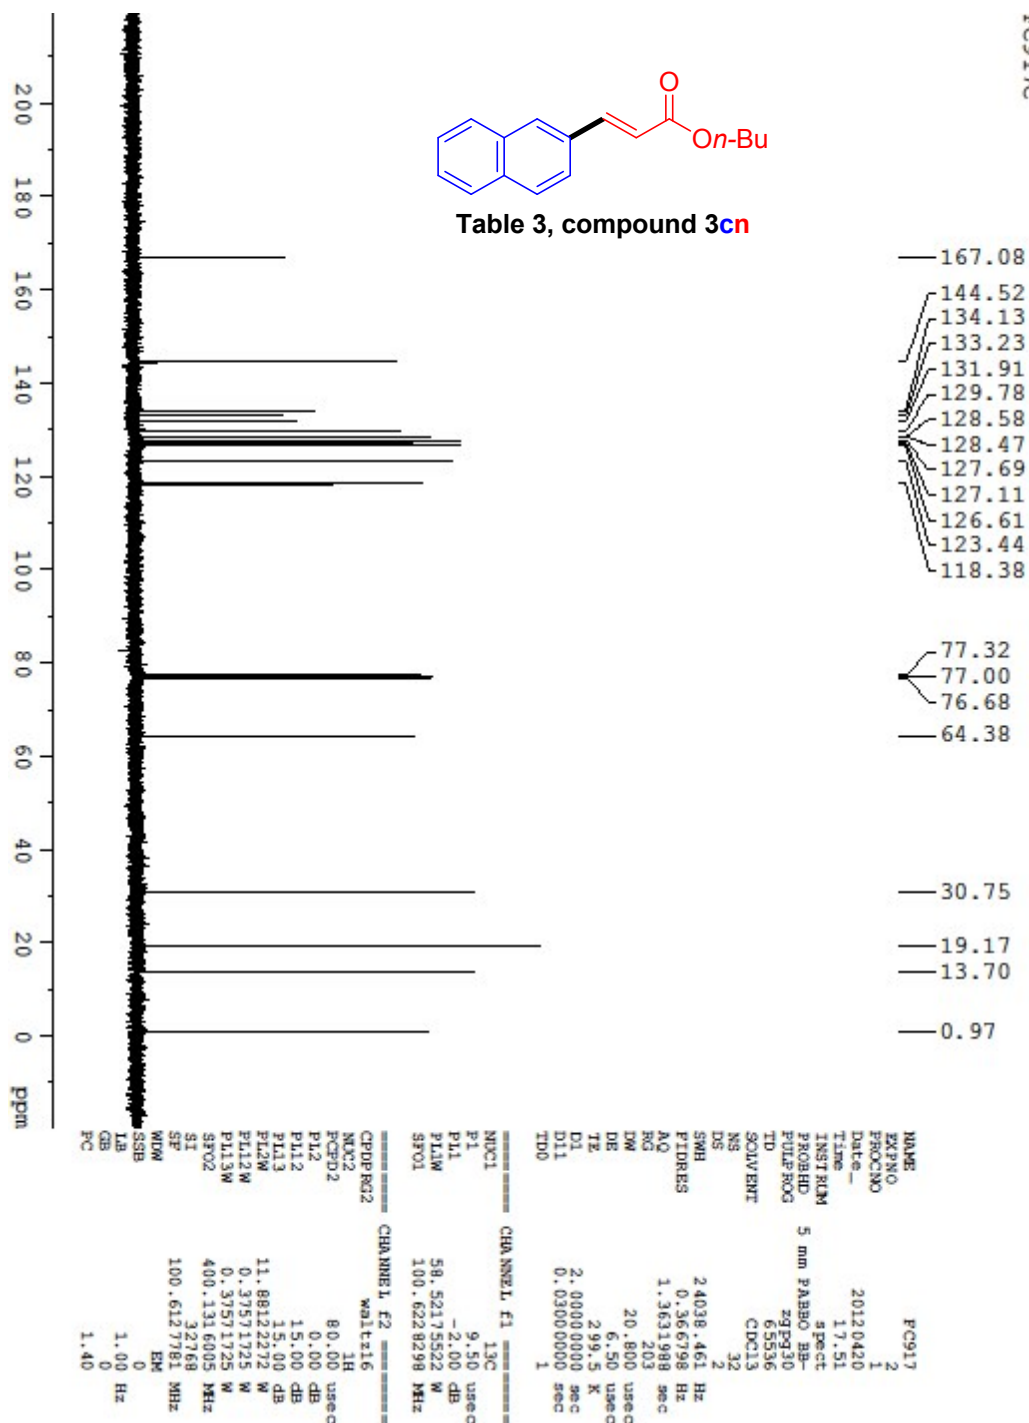

FC904H

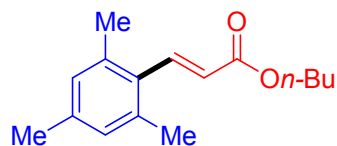

Table 3, compound 3in

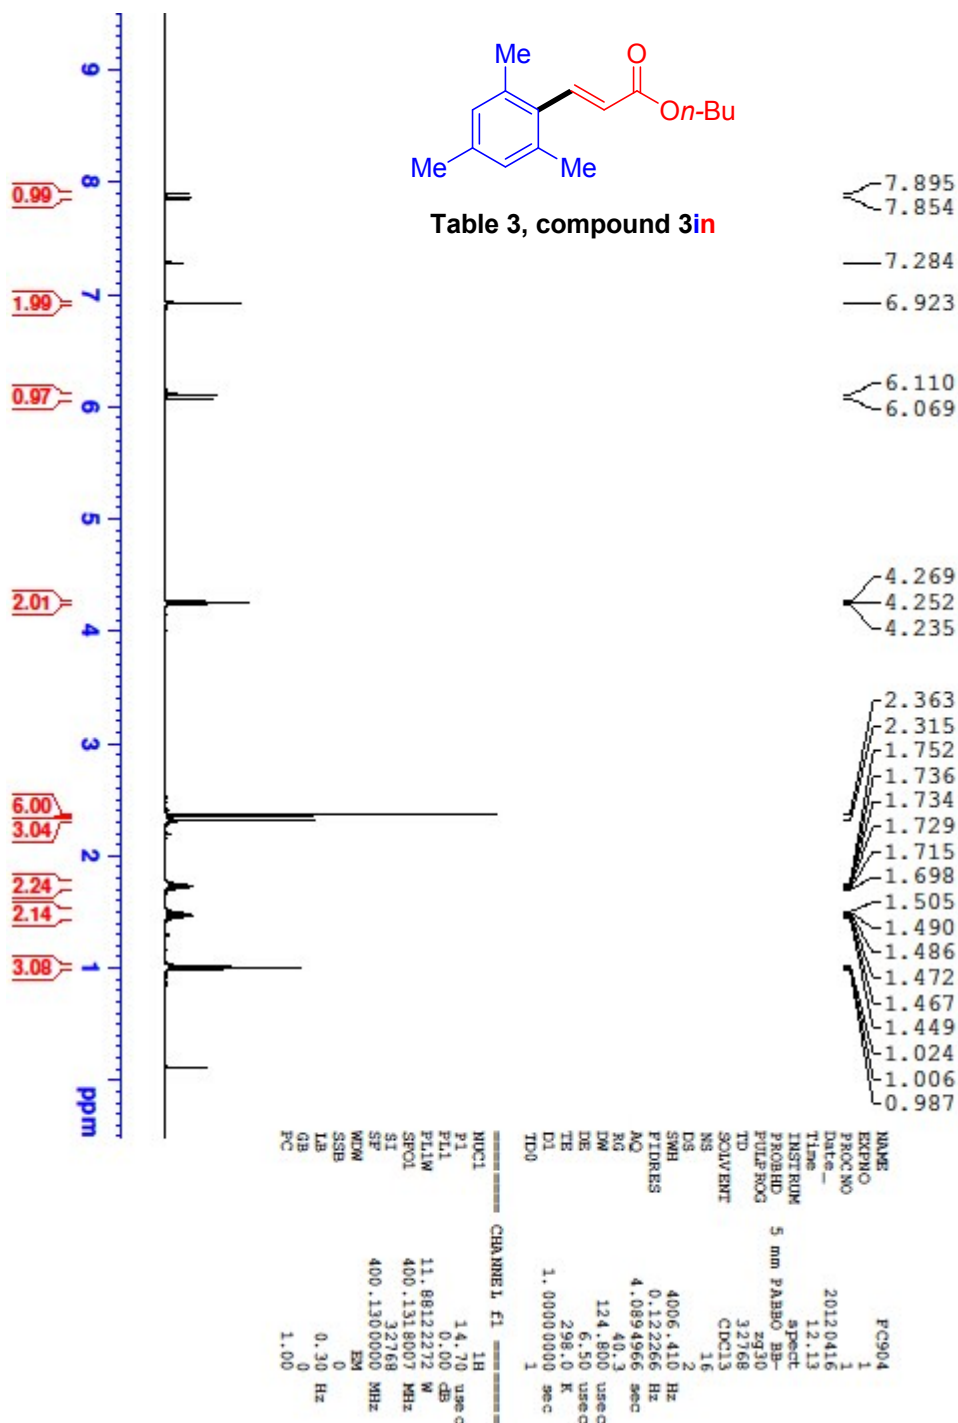

FC904C

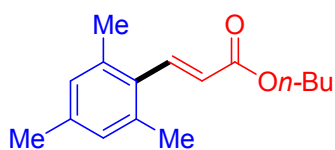

Table 3, compound 3in

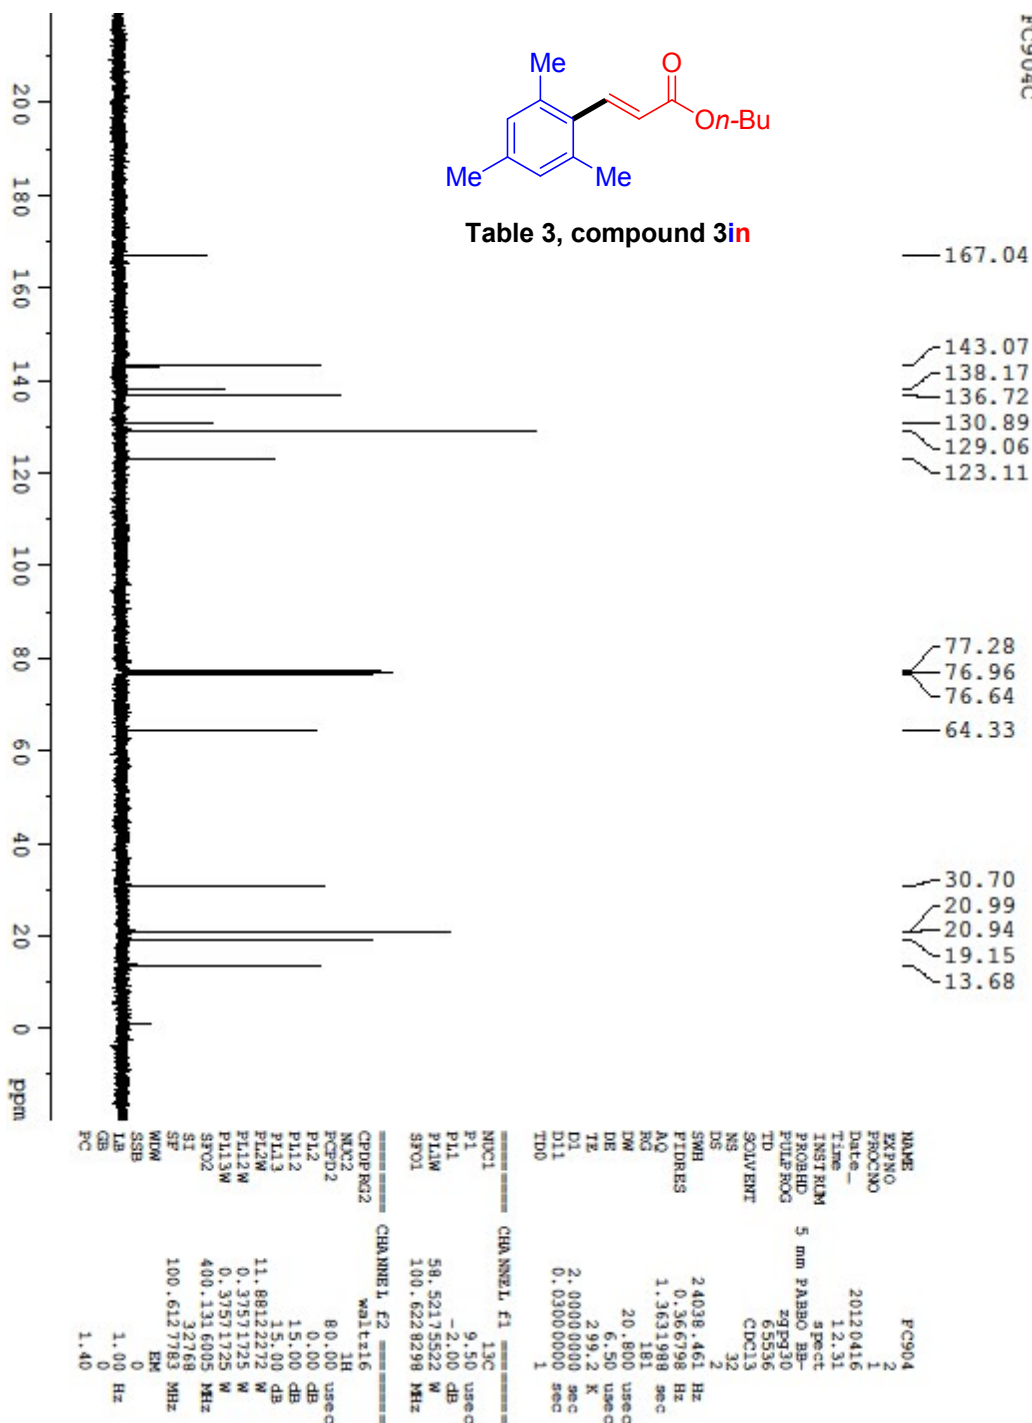

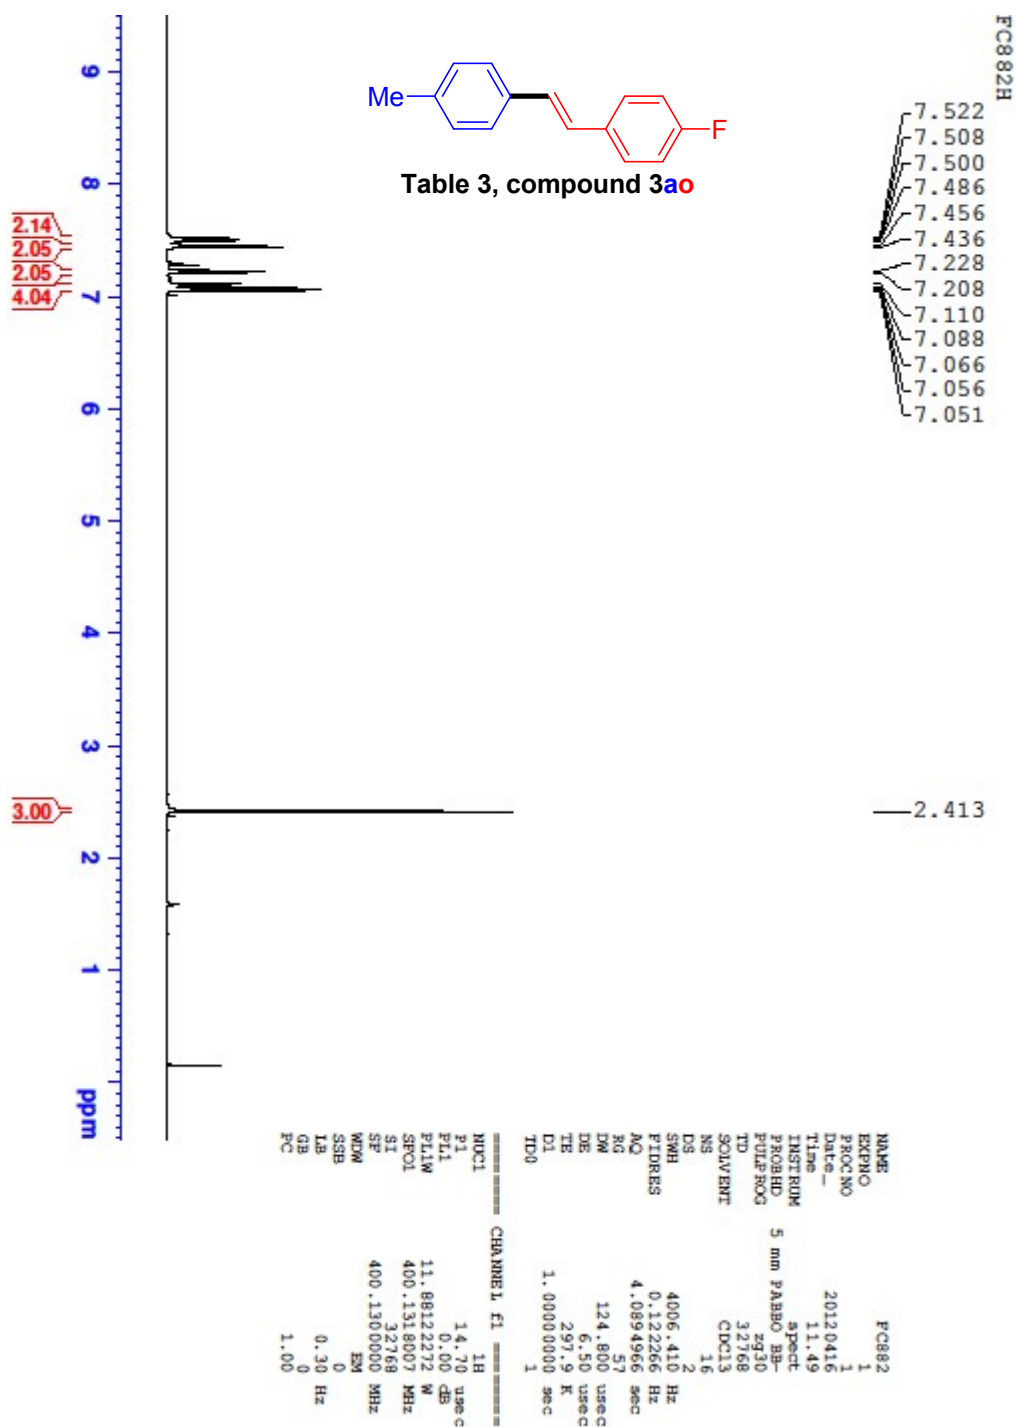

FC882C

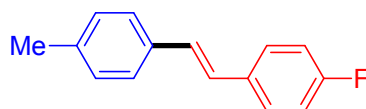

Table 3, compound 3a

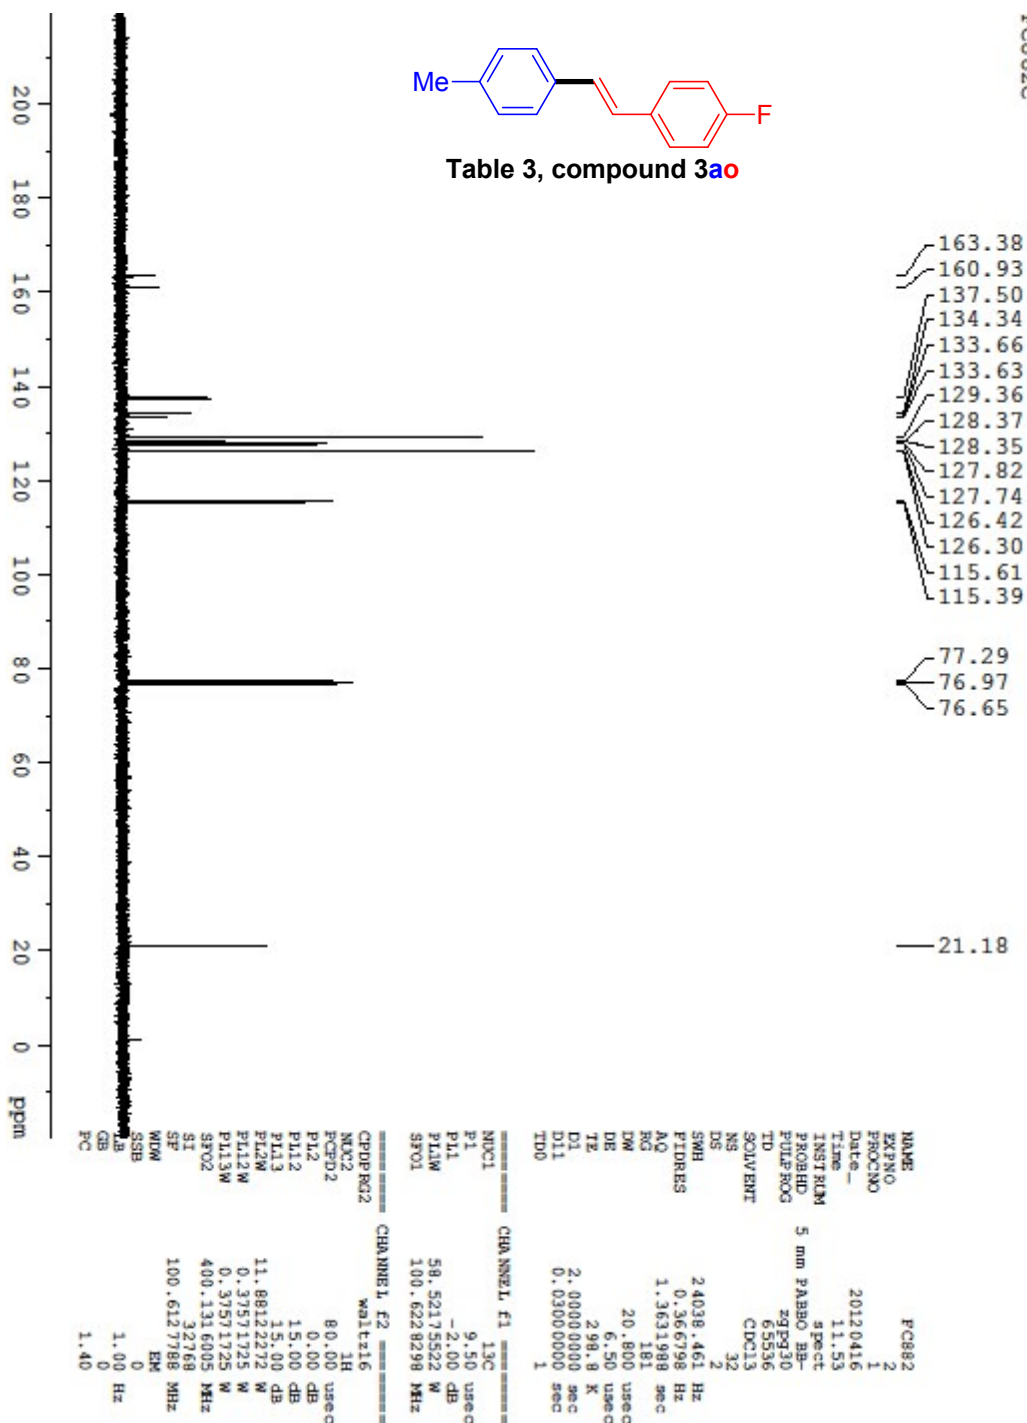

FC882F

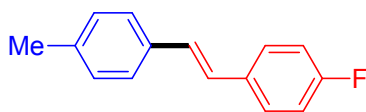

Table 3, compound 3<sup>ao</sup>

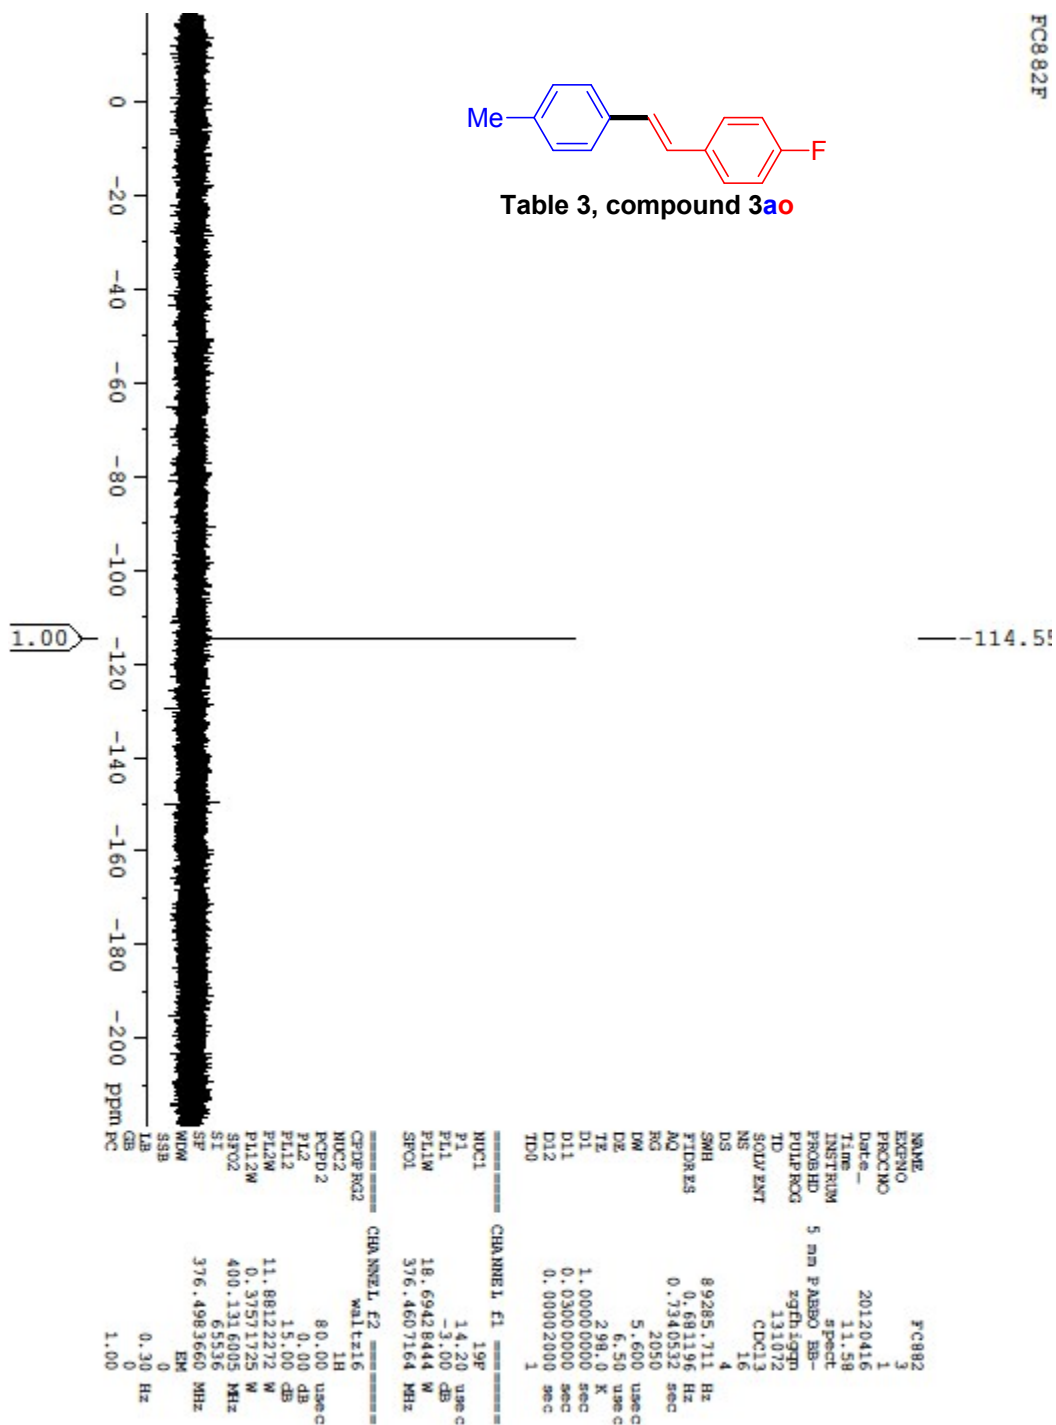

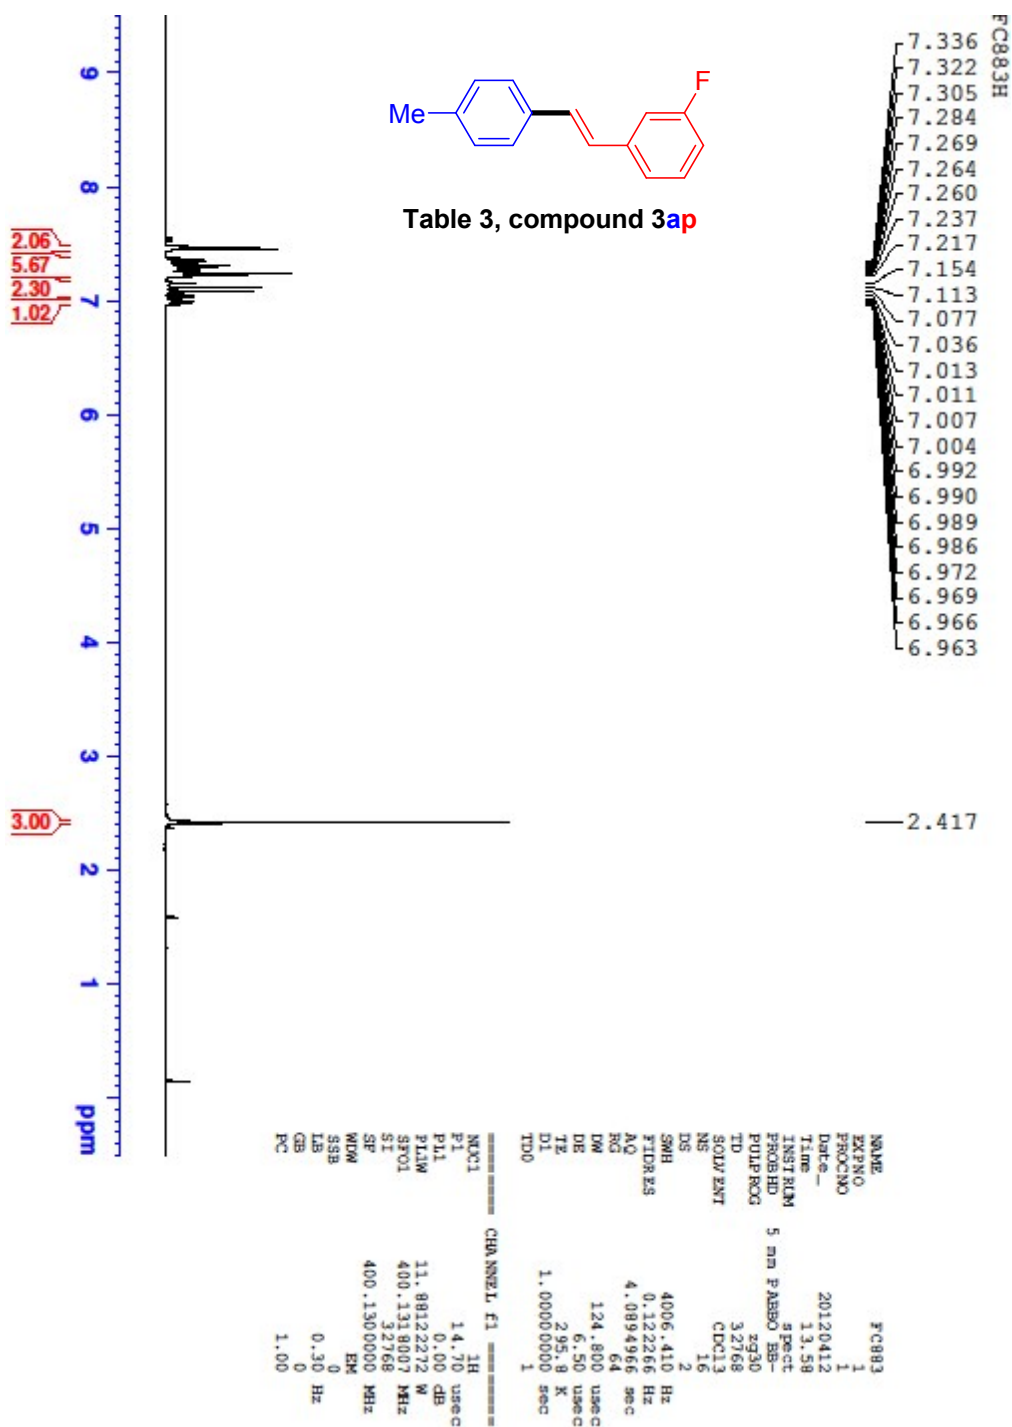

FC883C

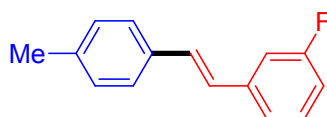

Table 3, compound 3ap

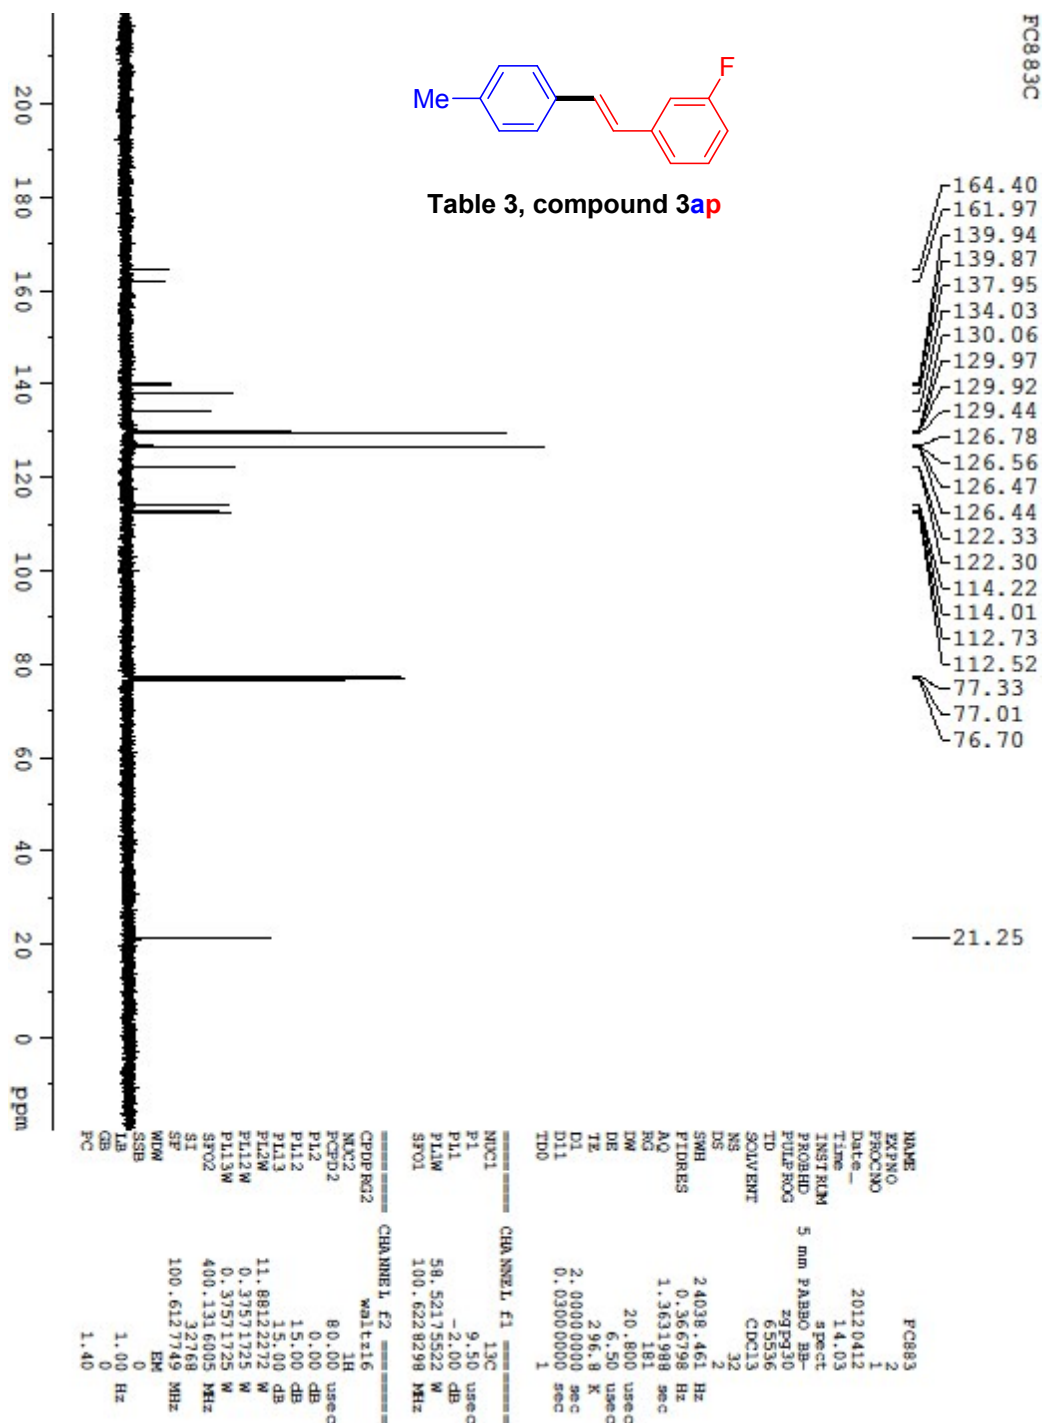

Table 3, compound 3ap

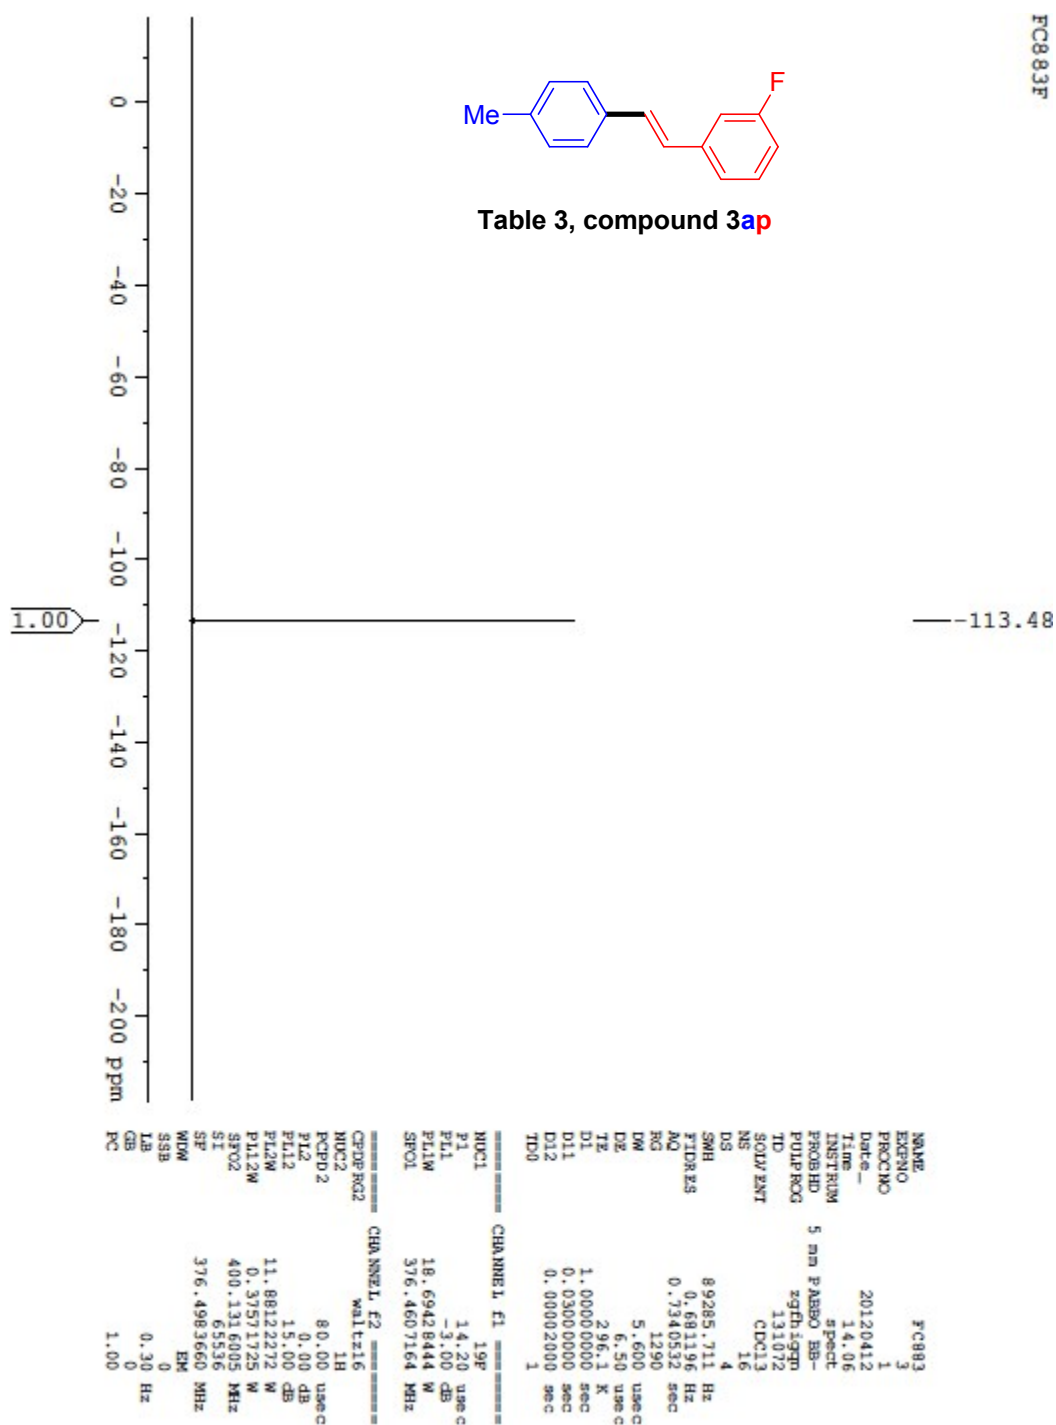

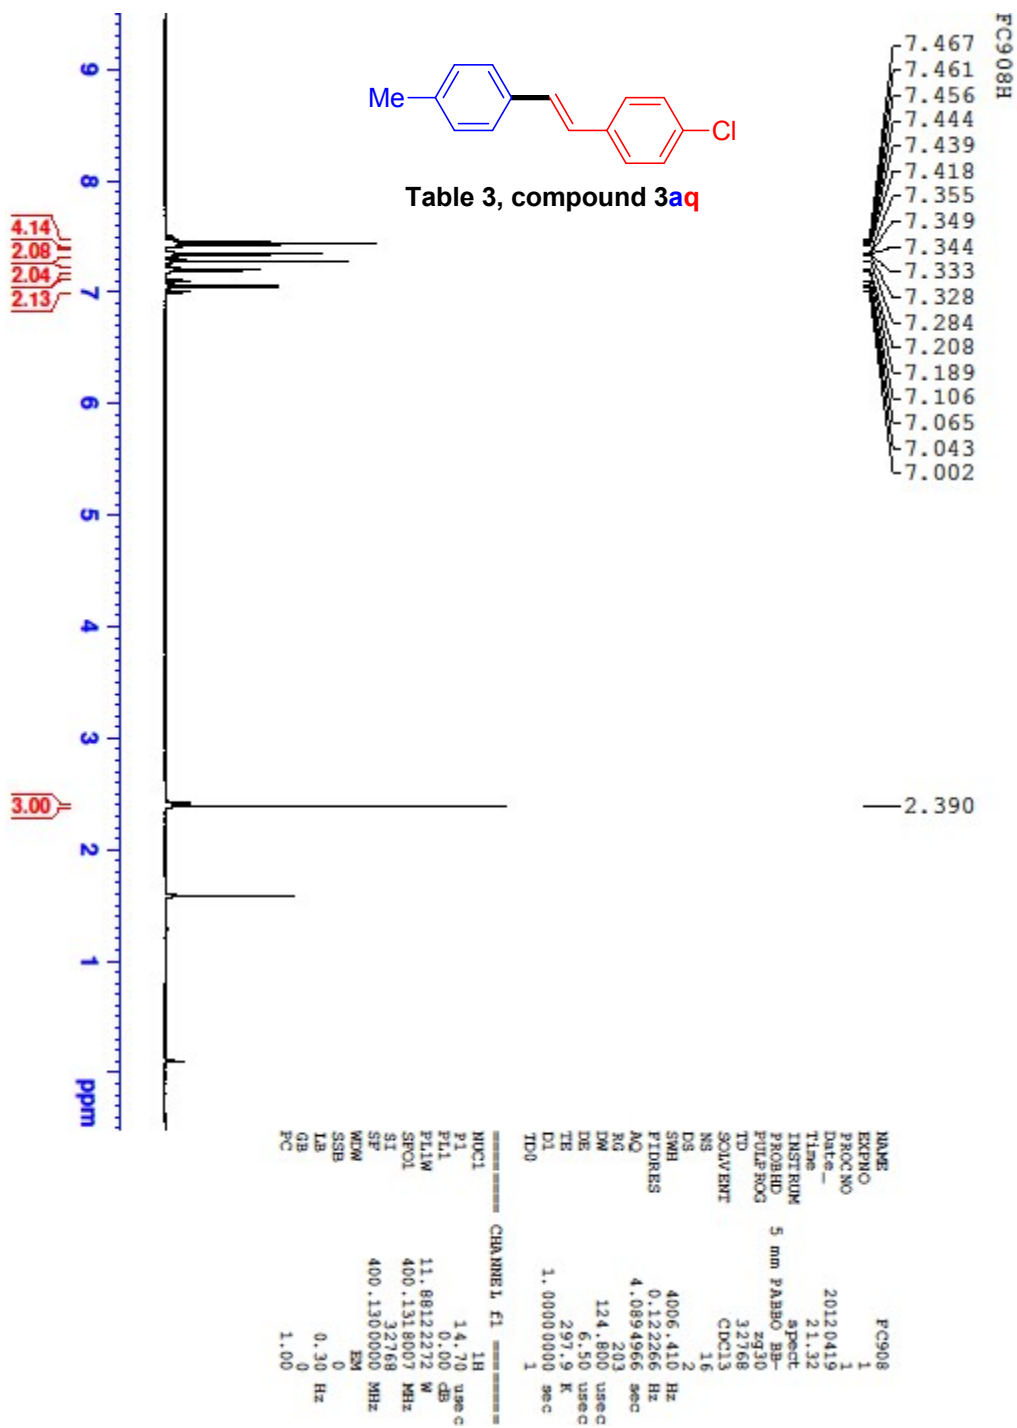

FC908C

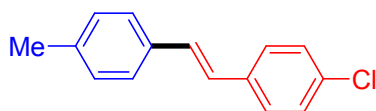

Table 3, compound 3aq

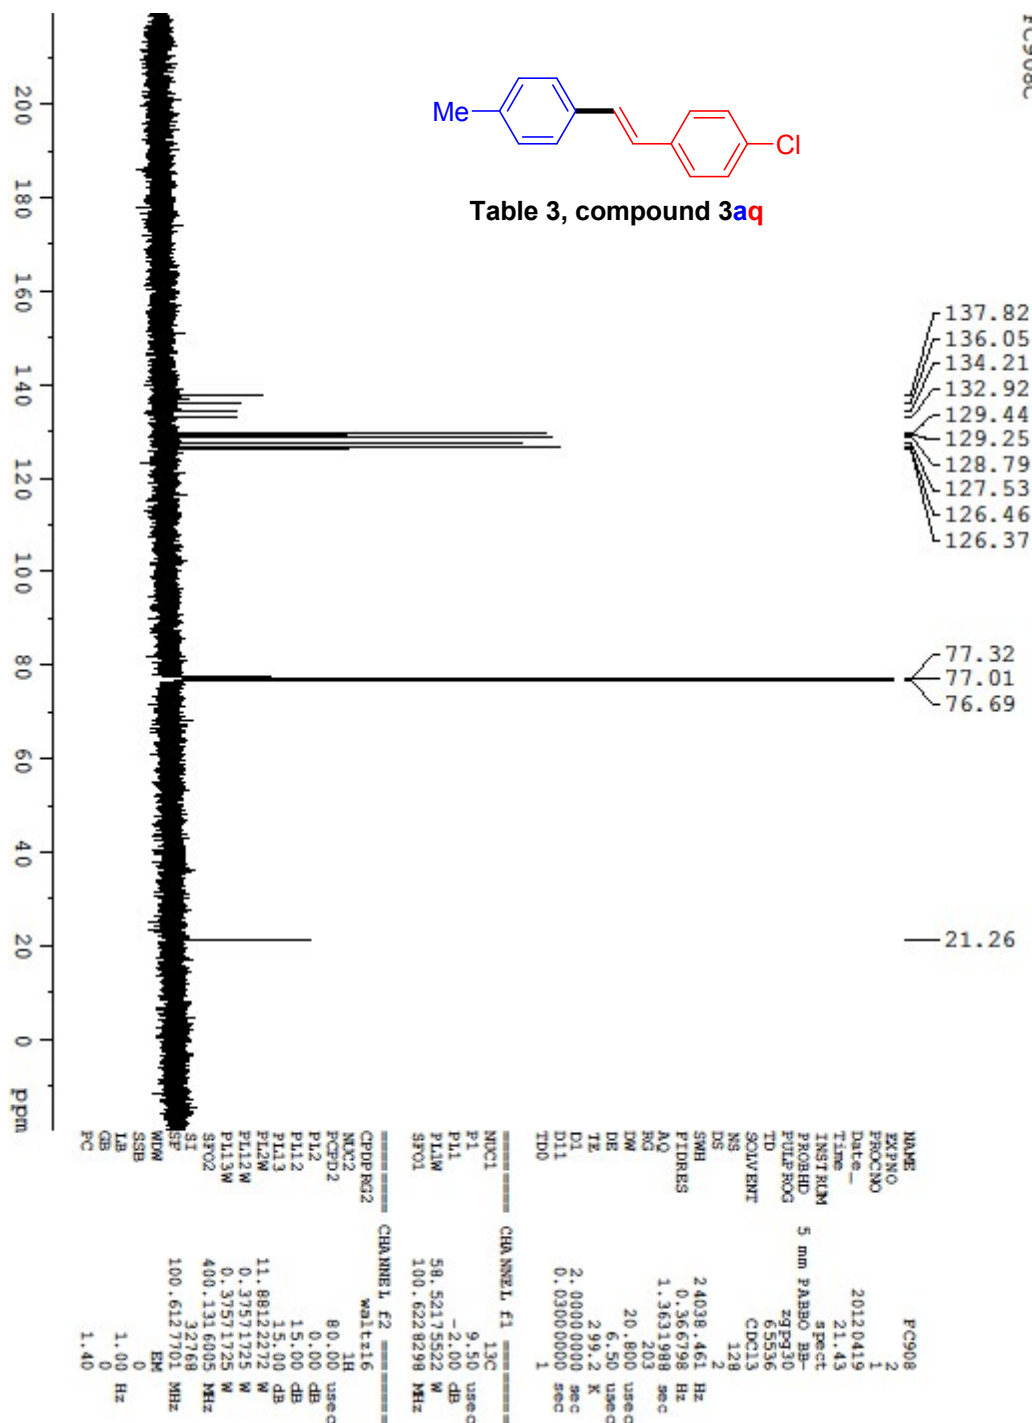

FC887H

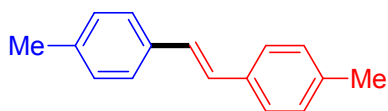

Table 3, compound 3ar

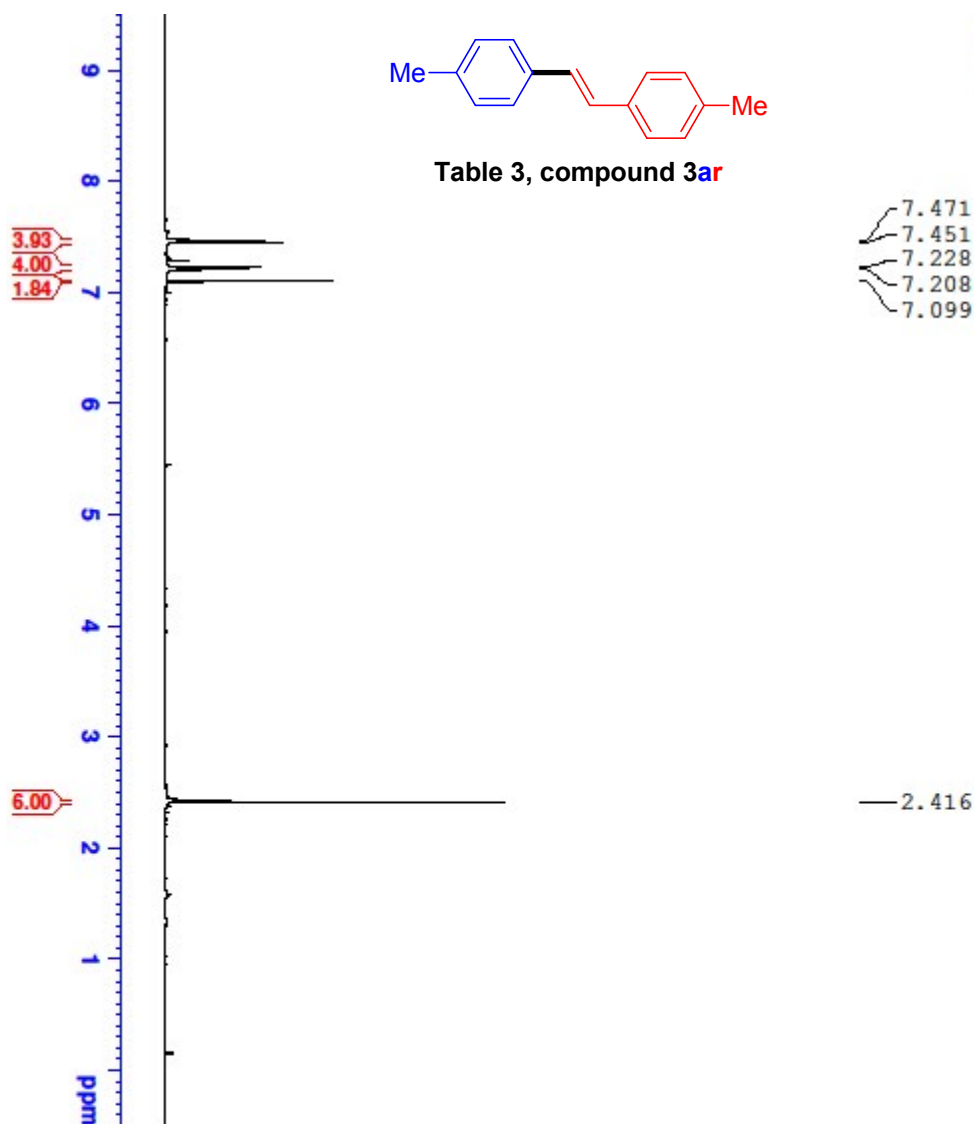

```

NAME          FC887
EXPNO         1
PROCNO        1
Date_         20120416
Time          12.04
INSTRUM       spect
PROBHD        5 mm PABBO BB-
PULPROG       zg30
TD            32768
SOLVENT       CDCl3
NS            16
DS            2
SWH            4006.410 Hz
FIDRES        0.122266 Hz
AQ            4.0894966 sec
RG            57
DE            124.800 usec
TE            297.8 K
D1            1.00000000 sec
TD0           1

===== CHANNEL f1 =====
NUC1          1H
P1            14.70 usec
PL1           0.00 dB
PL1W          11.8812272 W
SFO1          400.1318007 MHz
SI            32768
SF            400.1300000 MHz
WDW           EM
SSB           0
LB            0.30 Hz
GB            0
PC            1.00
  
```

FC887C

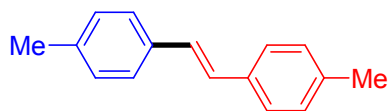

Table 3, compound 3ar

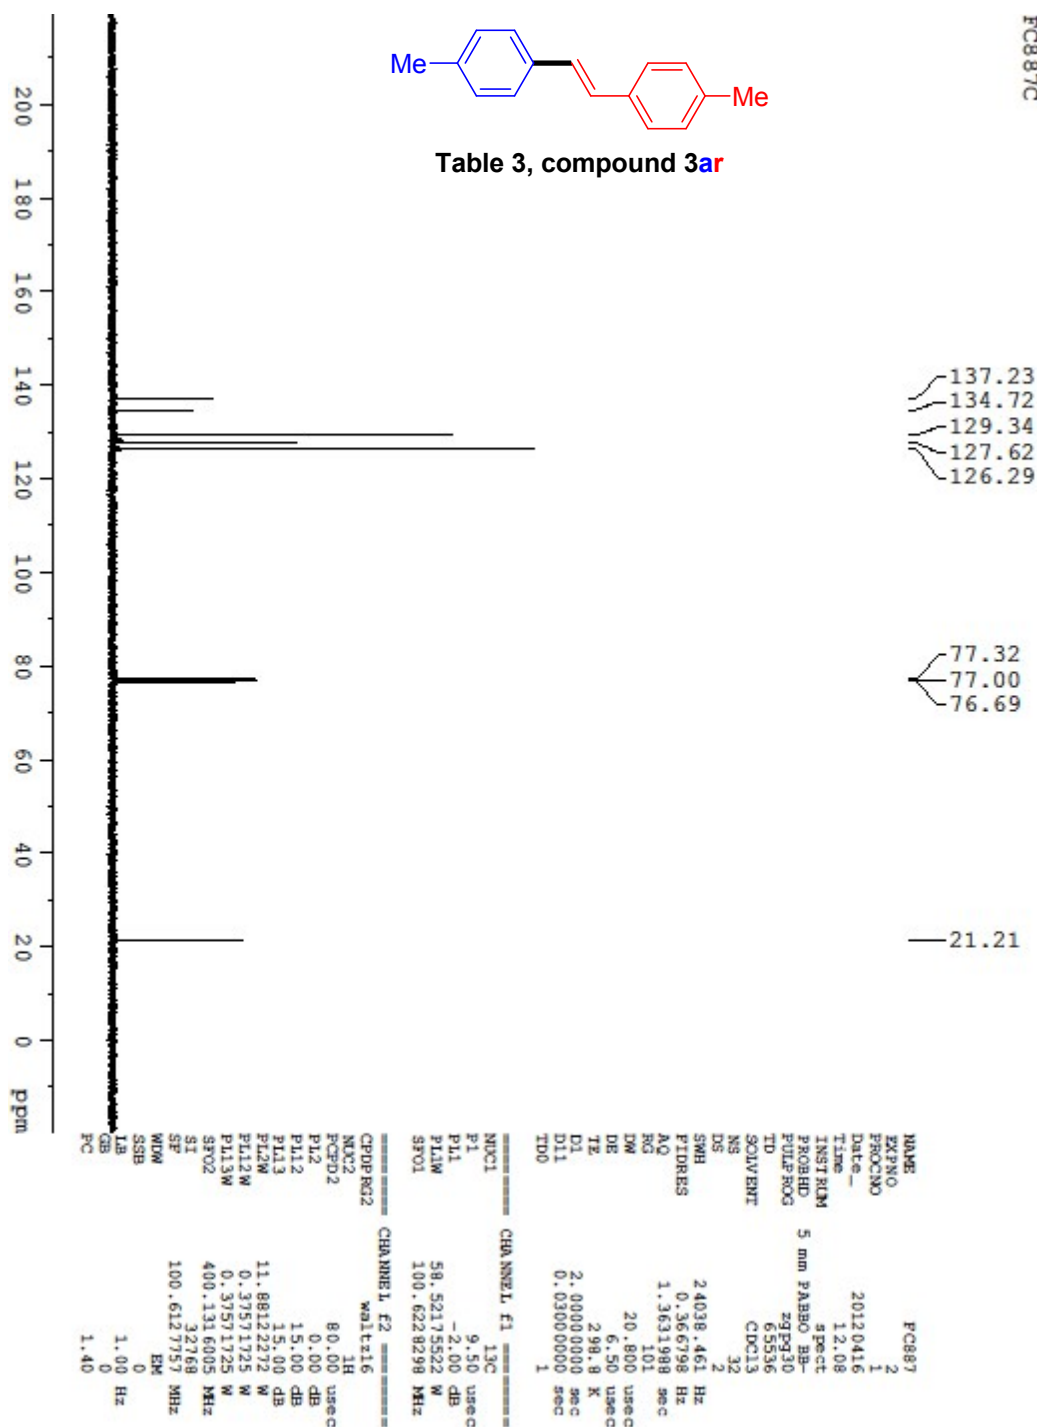

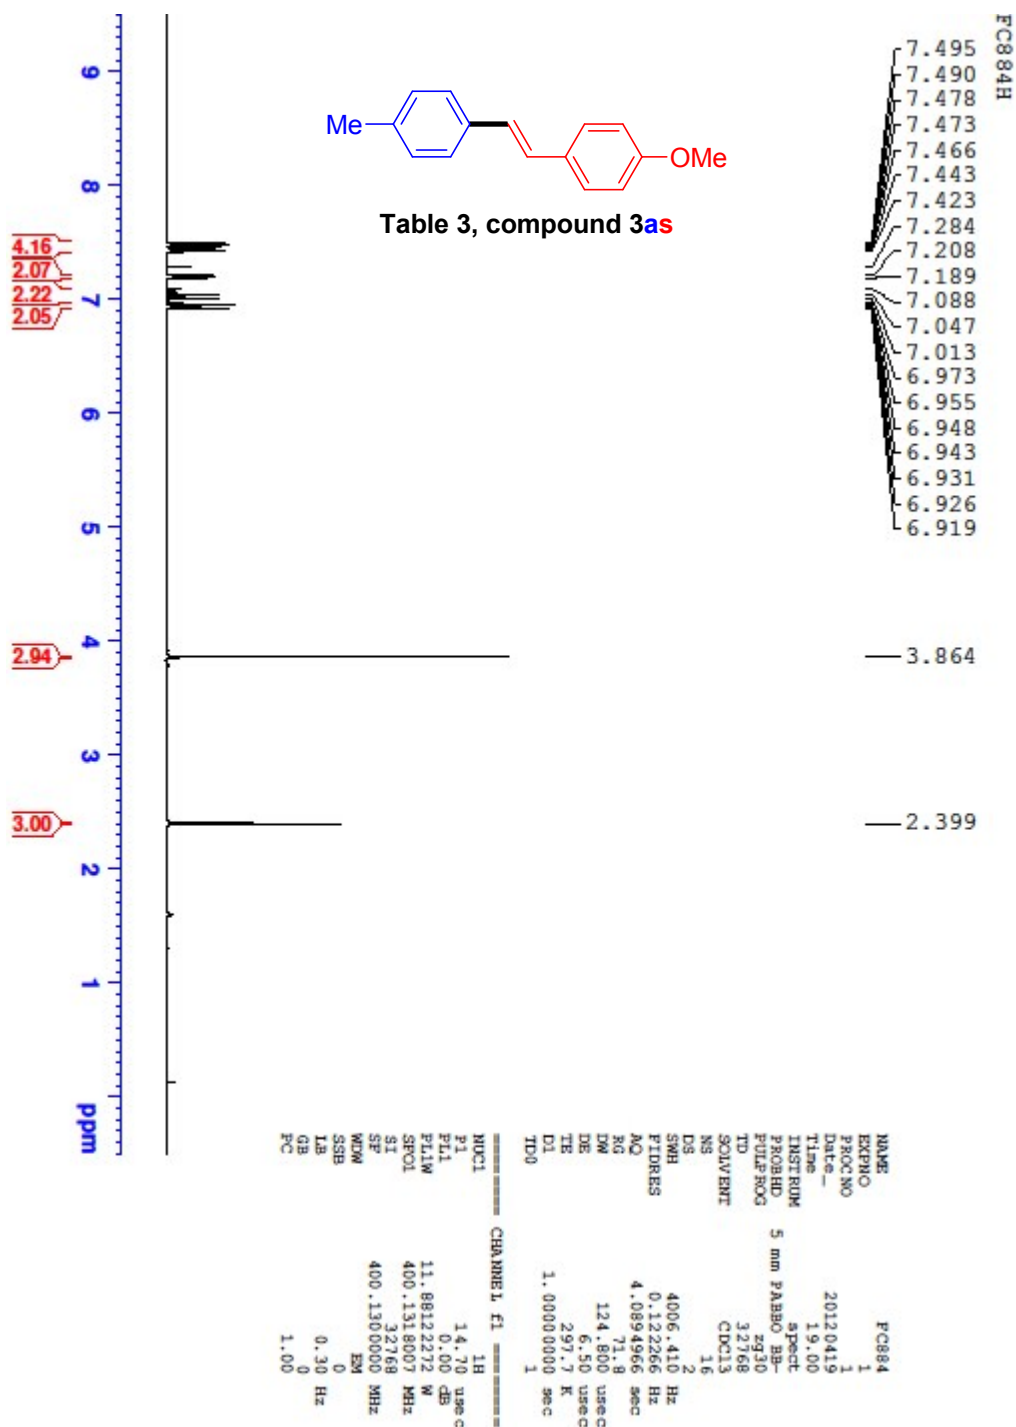

Table 3, compound 3as

COc1ccc(C=Cc2ccc(C)cc2)cc1

<sup>1</sup>H NMR spectrum (CDCl<sub>3</sub>) of compound 3as. The x-axis represents chemical shift in ppm (0 to 20). The spectrum shows several peaks: a singlet at 21.19 ppm (1H), a multiplet between 76.68-77.32 ppm (3H, solvent), a singlet at 55.27 ppm (2H), a multiplet between 114.08-137.01 ppm (aromatic protons), and a large multiplet between 126.13-129.32 ppm (aromatic protons).

| NAME  | EXPNO | PROCNO | Date_    | Time  | INSTRUM       | PROBHD | PULPROG | TD    | SOLVENT | CDCl3 | NS | DS           | SWH         | FIDRES        | AQ  | RG          | RG        | DW      | DE             | TE             | D1 | D11 | TD0 |
|-------|-------|--------|----------|-------|---------------|--------|---------|-------|---------|-------|----|--------------|-------------|---------------|-----|-------------|-----------|---------|----------------|----------------|----|-----|-----|
| PC884 | 2     | 1      | 20120419 | 19.08 | 5 mm PABO AB- | zgpg30 | zgpg30  | 65536 | CDCl3   | 33    | 2  | 24038.461 Hz | 0.366798 Hz | 1.3631988 sec | 203 | 20.800 usec | 6.50 usec | 298.6 K | 2.00000000 sec | 0.03000000 sec | 1  |     |     |

NAME PC884  
EXPNO 2  
PROCNO 1  
Date\_ 20120419  
Time 19.08  
INSTRUM 5 mm PABO AB-  
PROBHD zgpg30  
PULPROG zgpg30  
TD 65536  
SOLVENT CDCl3  
NS 33  
DS 2  
SWH 24038.461 Hz  
FIDRES 0.366798 Hz  
AQ 1.3631988 sec  
RG 203  
DW 20.800 usec  
DE 6.50 usec  
TE 298.6 K  
D1 2.00000000 sec  
D11 0.03000000 sec  
TD0 1

NAME PC884  
EXPNO 2  
PROCNO 1  
Date\_ 20120419  
Time 19.08  
INSTRUM 5 mm PABO AB-  
PROBHD zgpg30  
PULPROG zgpg30  
TD 65536  
SOLVENT CDCl3  
NS 33  
DS 2  
SWH 24038.461 Hz  
FIDRES 0.366798 Hz  
AQ 1.3631988 sec  
RG 203  
DW 20.800 usec  
DE 6.50 usec  
TE 298.6 K  
D1 2.00000000 sec  
D11 0.03000000 sec  
TD0 1

NAME PC884  
EXPNO 2  
PROCNO 1  
Date\_ 20120419  
Time 19.08  
INSTRUM 5 mm PABO AB-  
PROBHD zgpg30  
PULPROG zgpg30  
TD 65536  
SOLVENT CDCl3  
NS 33  
DS 2  
SWH 24038.461 Hz  
FIDRES 0.366798 Hz  
AQ 1.3631988 sec  
RG 203  
DW 20.800 usec  
DE 6.50 usec  
TE 298.6 K  
D1 2.00000000 sec  
D11 0.03000000 sec  
TD0 1

NAME PC884  
EXPNO 2  
PROCNO 1  
Date\_ 20120419  
Time 19.08  
INSTRUM 5 mm PABO AB-  
PROBHD zgpg30  
PULPROG zgpg30  
TD 65536  
SOLVENT CDCl3  
NS 33  
DS 2  
SWH 24038.461 Hz  
FIDRES 0.366798 Hz  
AQ 1.3631988 sec  
RG 203  
DW 20.800 usec  
DE 6.50 usec  
TE 298.6 K  
D1 2.00000000 sec  
D11 0.03000000 sec  
TD0 1

NAME PC884  
EXPNO 2  
PROCNO 1  
Date\_ 20120419  
Time 19.08  
INSTRUM 5 mm PABO AB-  
PROBHD zgpg30  
PULPROG zgpg30  
TD 65536  
SOLVENT CDCl3  
NS 33  
DS 2  
SWH 24038.461 Hz  
FIDRES 0.366798 Hz  
AQ 1.3631988 sec  
RG 203  
DW 20.800 usec  
DE 6.50 usec  
TE 298.6 K  
D1 2.00000000 sec  
D11 0.03000000 sec  
TD0 1

NAME PC884  
EXPNO 2  
PROCNO 1  
Date\_ 20120419  
Time 19.08  
INSTRUM 5 mm PABO AB-  
PROBHD zgpg30  
PULPROG zgpg30  
TD 65536  
SOLVENT CDCl3  
NS 33  
DS 2  
SWH 24038.461 Hz  
FIDRES 0.366798 Hz  
AQ 1.3631988 sec  
RG 203  
DW 20.800 usec  
DE 6.50 usec  
TE 298.6 K  
D1 2.00000000 sec  
D11 0.03000000 sec  
TD0 1

NAME PC884  
EXPNO 2  
PROCNO 1  
Date\_ 20120419  
Time 19.08  
INSTRUM 5 mm PABO AB-  
PROBHD zgpg30  
PULPROG zgpg30  
TD 65536  
SOLVENT CDCl3  
NS 33  
DS 2  
SWH 24038.461 Hz  
FIDRES 0.366798 Hz  
AQ 1.3631988 sec  
RG 203  
DW 20.800 usec  
DE 6.50 usec  
TE 298.6 K  
D1 2.00000000 sec  
D11 0.03000000 sec  
TD0 1

NAME PC884  
EXPNO 2  
PROCNO 1  
Date\_ 20120419  
Time 19.08  
INSTRUM 5 mm PABO AB-  
PROBHD zgpg30  
PULPROG zgpg30  
TD 65536  
SOLVENT CDCl3  
NS 33  
DS 2  
SWH 24038.461 Hz  
FIDRES 0.366798 Hz  
AQ 1.3631988 sec  
RG 203  
DW 20.800 usec  
DE 6.50 usec  
TE 298.6 K  
D1 2.00000000 sec  
D11 0.03000000 sec  
TD0 1

NAME PC884  
EXPNO 2  
PROCNO 1  
Date\_ 20120419  
Time 19.08  
INSTRUM 5 mm PABO AB-  
PROBHD zgpg30  
PULPROG zgpg30  
TD 65536  
SOLVENT CDCl3  
NS 33  
DS 2  
SWH 24038.461 Hz  
FIDRES 0.366798 Hz  
AQ 1.3631988 sec  
RG 203  
DW 20.800 usec  
DE 6.50 usec  
TE 298.6 K  
D1 2.00000000 sec  
D11 0.03000000 sec  
TD0 1

NAME PC884  
EXPNO 2  
PROCNO 1  
Date\_ 20120419  
Time 19.08  
INSTRUM 5 mm PABO AB-  
PROBHD zgpg30  
PULPROG zgpg30  
TD 65536  
SOLVENT CDCl3  
NS 33  
DS 2  
SWH 24038.461 Hz  
FIDRES 0.366798 Hz  
AQ 1.3631988 sec  
RG 203  
DW 20.800 usec  
DE 6.50 usec  
TE 298.6 K  
D1 2.00000000 sec  
D11 0.03000000 sec  
TD0 1

NAME PC884  
EXPNO 2  
PROCNO 1  
Date\_ 20120419  
Time 19.08  
INSTRUM 5 mm PABO AB-  
PROBHD zgpg30  
PULPROG zgpg30  
TD 65536  
SOLVENT CDCl3  
NS 33  
DS 2  
SWH 24038.461 Hz  
FIDRES 0.366798 Hz  
AQ 1.3631988 sec  
RG 203  
DW 20.800 usec  
DE 6.50 usec  
TE 298.6 K  
D1 2.00000000 sec  
D11 0.03000000 sec  
TD0 1

NAME PC884  
EXPNO 2  
PROCNO 1  
Date\_ 20120419  
Time 19.08  
INSTRUM 5 mm PABO AB-  
PROBHD zgpg30  
PULPROG zgpg30  
TD 65536  
SOLVENT CDCl3  
NS 33  
DS 2  
SWH 24038.461 Hz  
FIDRES 0.366798 Hz  
AQ 1.3631988 sec  
RG 203  
DW 20.800 usec  
DE 6.50 usec  
TE 298.6 K  
D1 2.00000000 sec  
D11 0.03000000 sec  
TD0 1

NAME PC884  
EXPNO 2  
PROCNO 1  
Date\_ 20120419  
Time 19.08  
INSTRUM 5 mm PABO AB-  
PROBHD zgpg30  
PULPROG zgpg30  
TD 65536  
SOLVENT CDCl3  
NS 33  
DS 2  
SWH 24038.461 Hz  
FIDRES 0.366798 Hz  
AQ 1.3631988 sec  
RG 203  
DW 20.800 usec  
DE 6.50 usec  
TE 298.6 K  
D1 2.00000000 sec  
D11 0.03000000 sec  
TD0 1

NAME PC884  
EXPNO 2  
PROCNO 1  
Date\_ 20120419  
Time 19.08  
INSTRUM 5 mm PABO AB-  
PROBHD zgpg30  
PULPROG zgpg30  
TD 65536  
SOLVENT CDCl3  
NS 33  
DS 2  
SWH 24038.461 Hz  
FIDRES 0.366798 Hz  
AQ 1.3631988 sec  
RG 203  
DW 20.800 usec  
DE 6.50 usec  
TE 298.6 K  
D1 2.00000000 sec  
D11 0.03000000 sec  
TD0 1

NAME PC884  
EXPNO 2  
PROCNO 1  
Date\_ 20120419  
Time 19.08  
INSTRUM 5 mm PABO AB-  
PROBHD zgpg30  
PULPROG zgpg30  
TD 65536  
SOLVENT CDCl3  
NS 33  
DS 2  
SWH 24038.461 Hz  
FIDRES 0.366798 Hz  
AQ 1.3631988 sec  
RG 203  
DW 20.800 usec  
DE

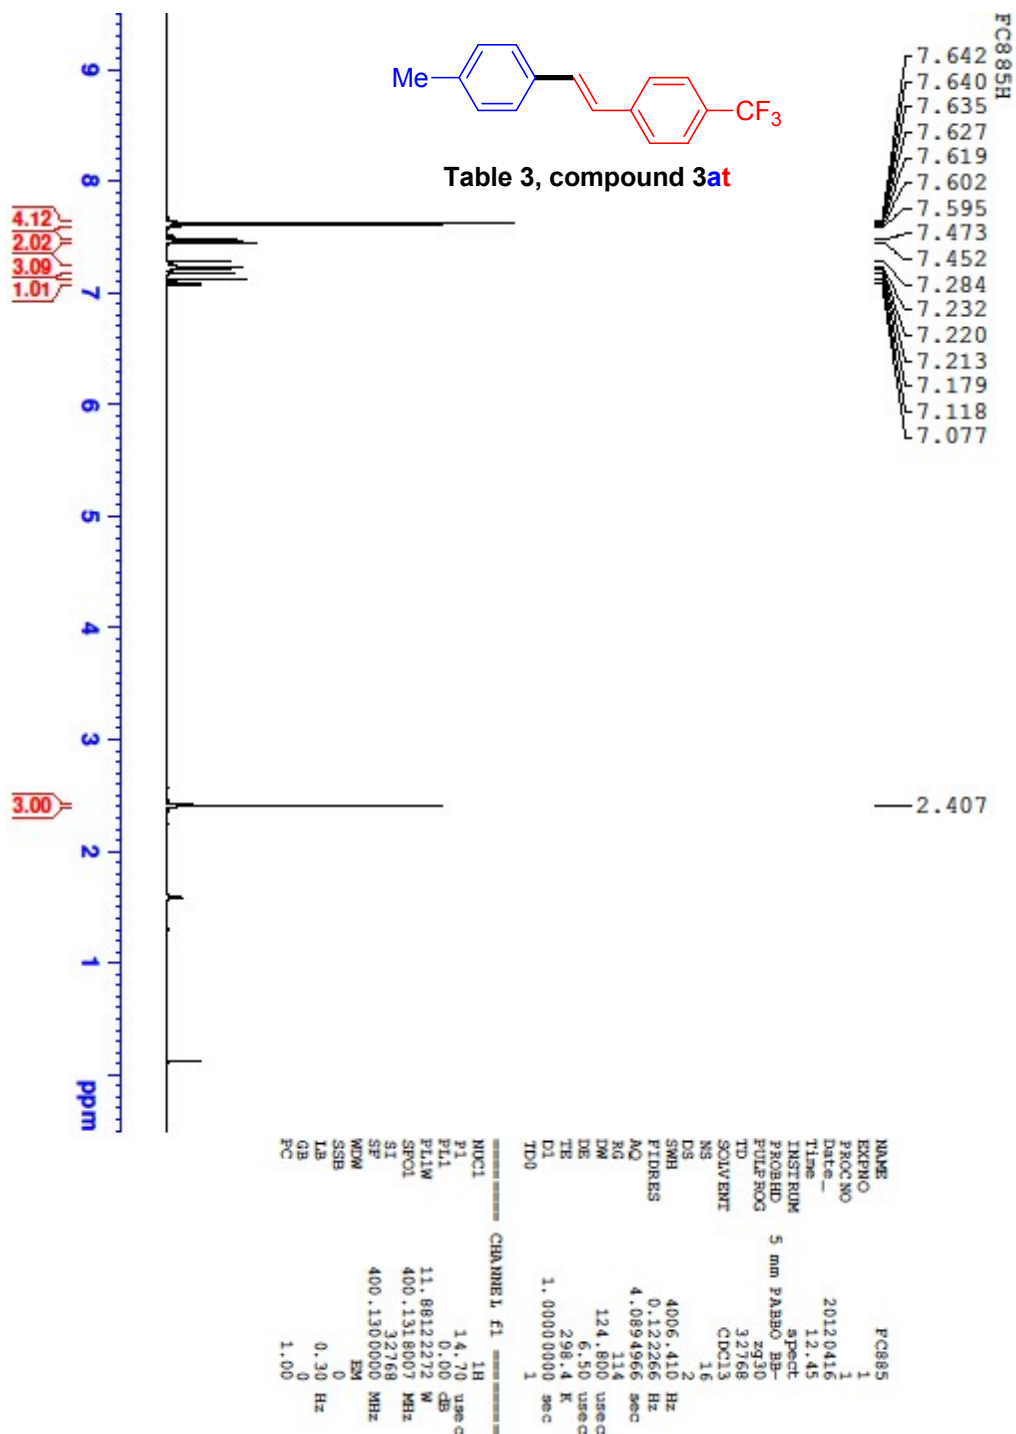

FC885C

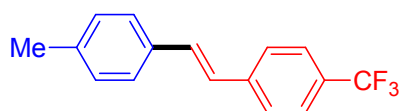

Table 3, compound 3at

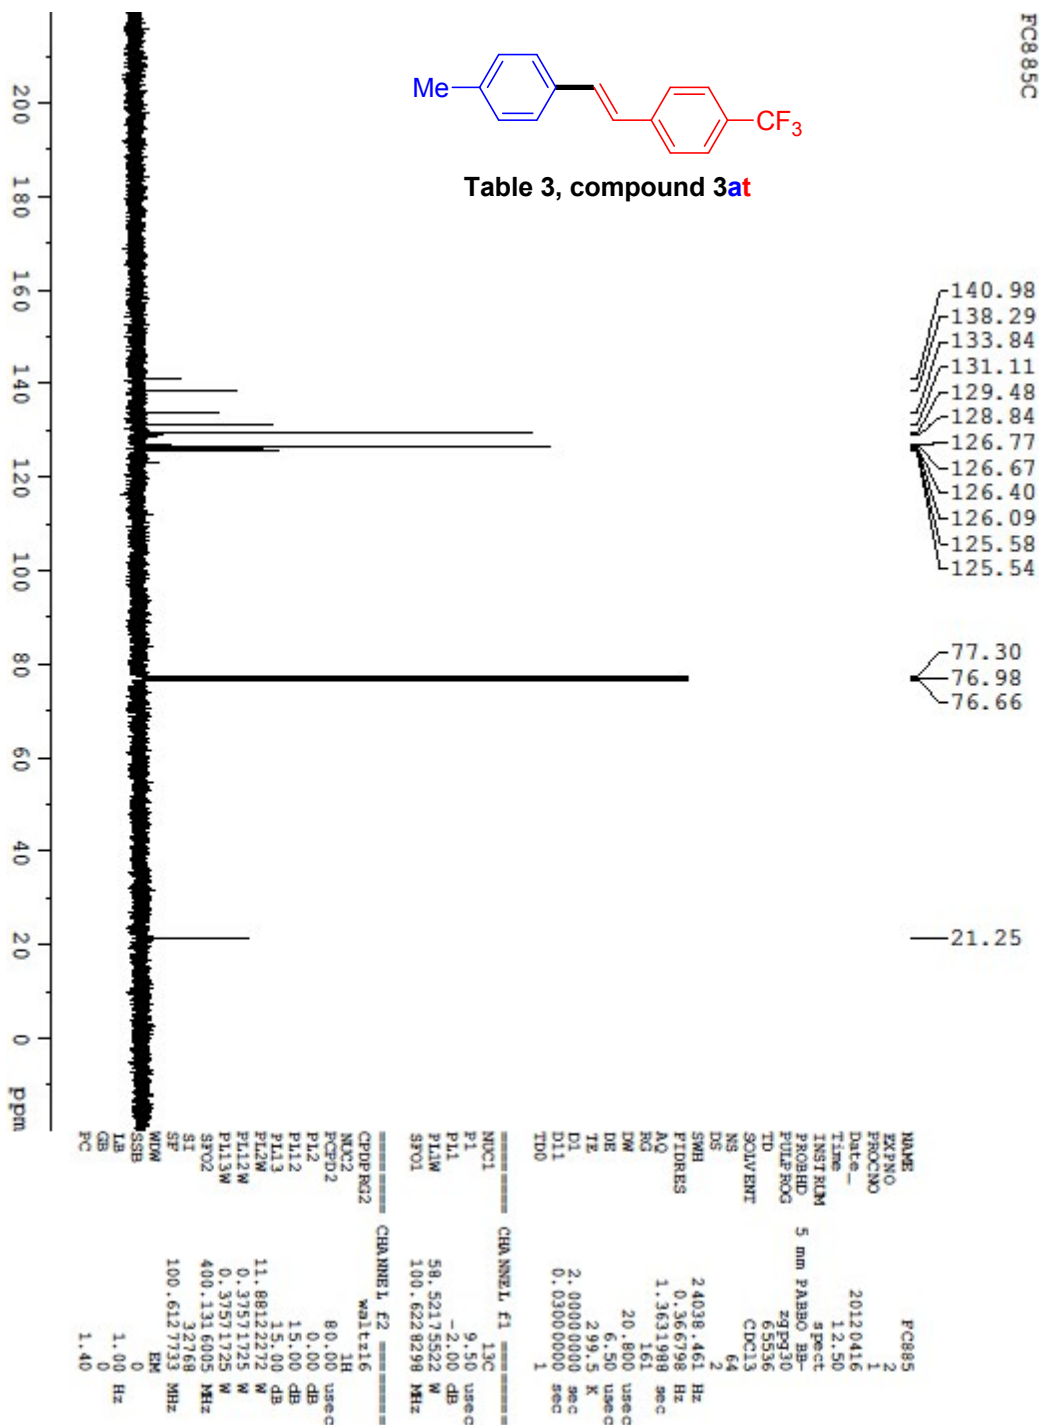

FC885F

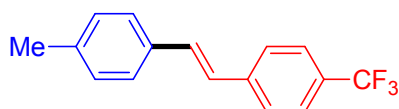

Table 3, compound 3at

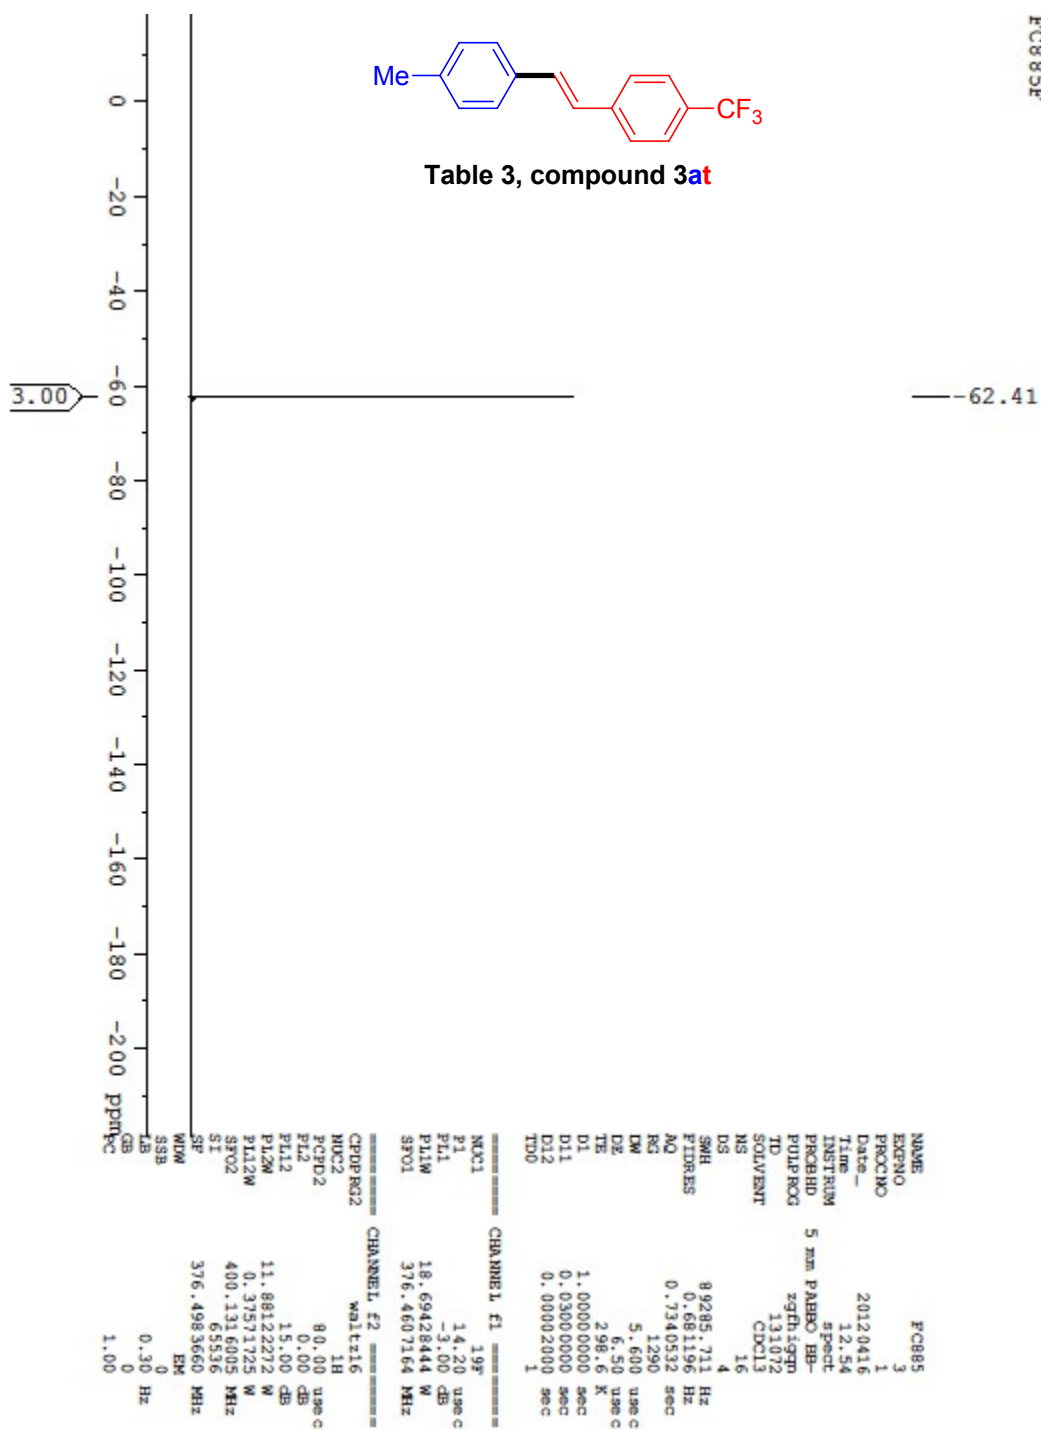

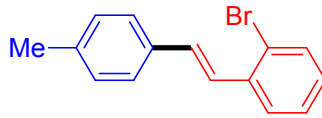

Table 3, compound 3au

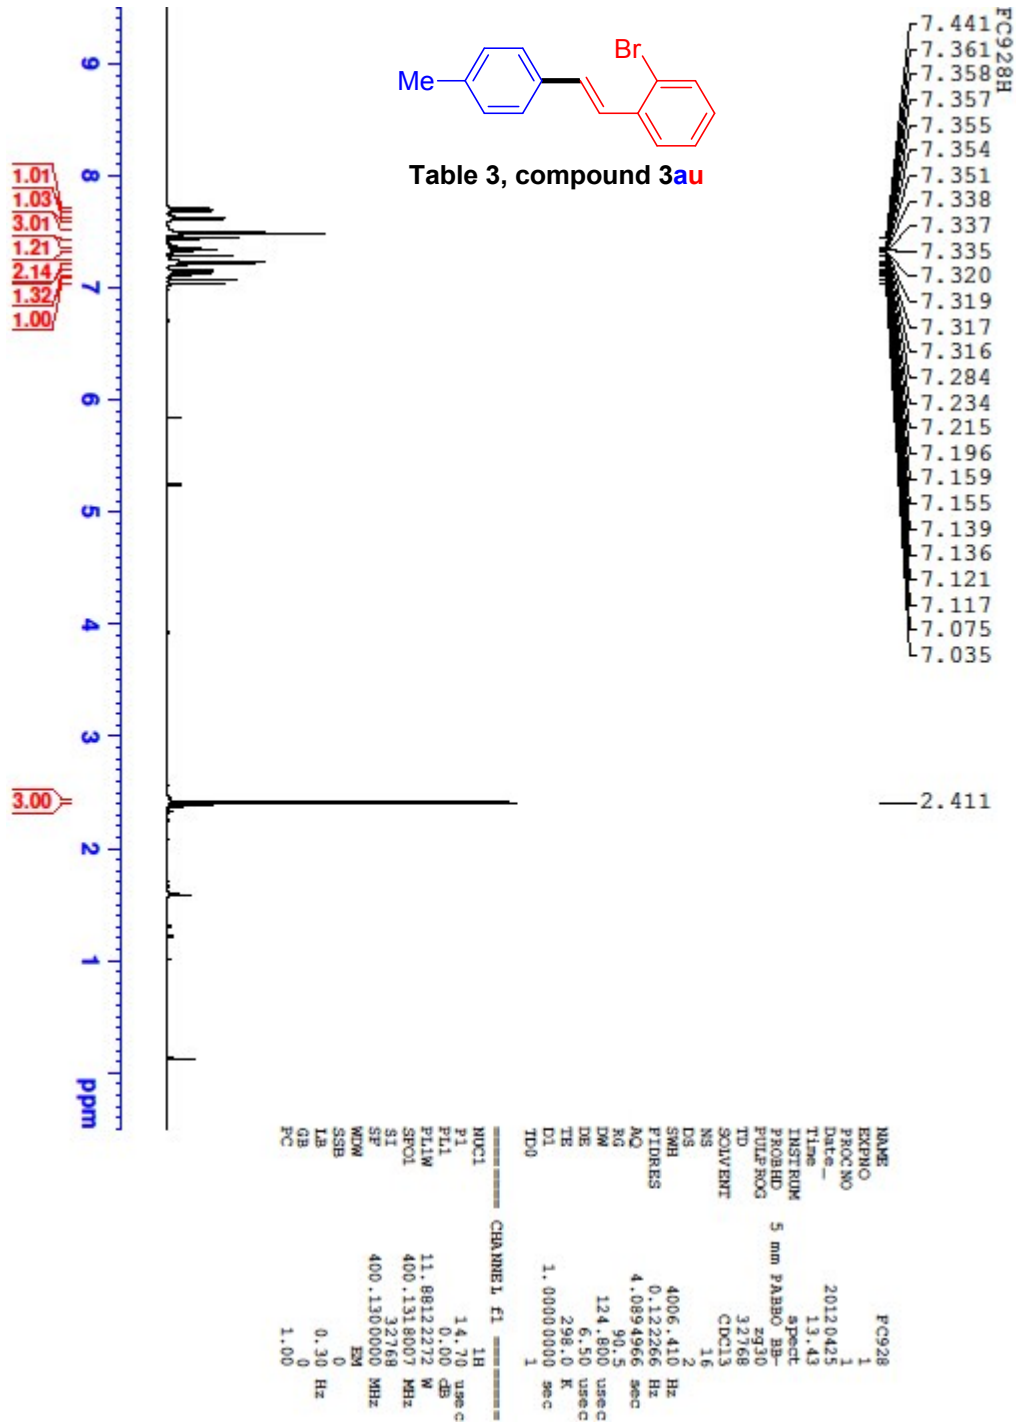

FC928C

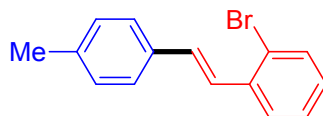

Table 3, compound 3au

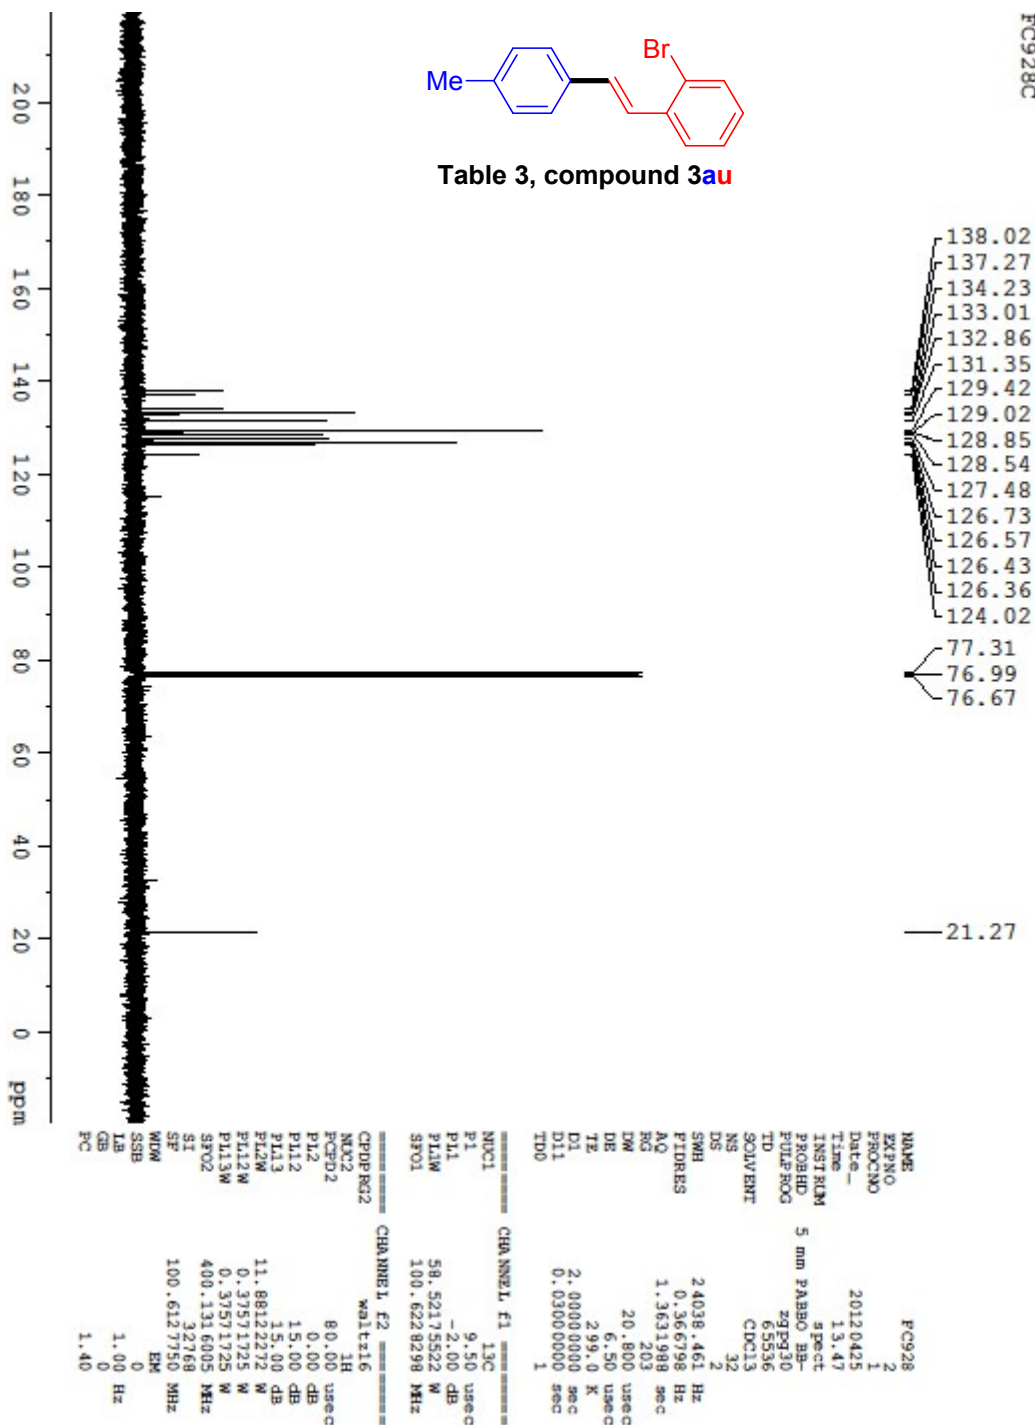

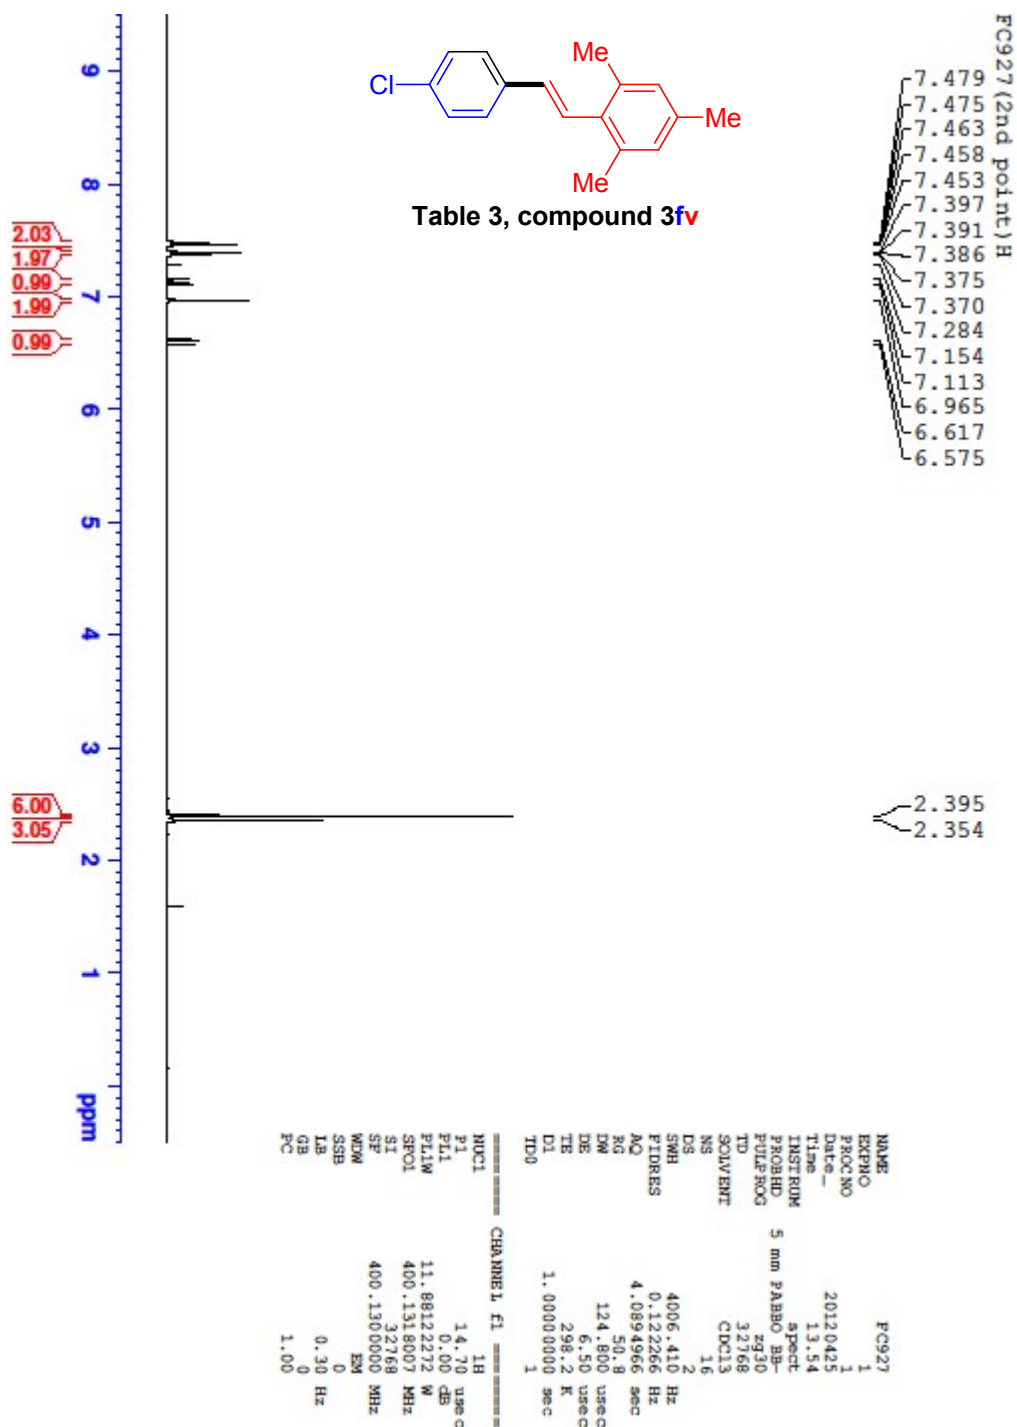

136.47  
136.19  
136.08  
133.58  
132.99  
132.34  
127.56  
127.35

77.31  
76.99  
76.68

— 20.95

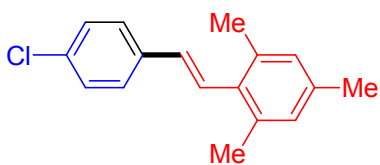

**Table 3, compound 3fv**

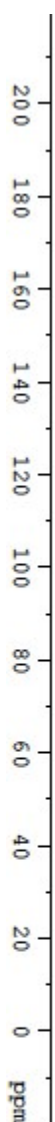

| NAME    | PC927          |  |
|---------|----------------|--|
| EXPNO   | 2              |  |
| PROCNO  | 1              |  |
| Date_   | 20120425       |  |
| Time    | 14.05          |  |
| INSTRUM | 5 mm PABBO BB- |  |
| PROBHD  | 3spect         |  |
| PULPROG | zgpg30         |  |
| TD      | 65536          |  |
| SOLVENT | CDCl3          |  |
| NS      | 32             |  |
| DS      | 2              |  |
| SWH     | 24038.461 Hz   |  |
| FIDRES  | 0.366798 Hz    |  |
| AQ      | 1.3631988 sec  |  |
| RG      | 203            |  |
| FW      | 20.800 usec    |  |
| DE      | 6.50 usec      |  |
| TE      | 299.1 K        |  |
| DE      | 2.0000000 sec  |  |
| D11     | 0.0300000 sec  |  |
| TDO     | 1              |  |

  

| NAME | CHANNEL F1      |  |
|------|-----------------|--|
| NUC1 | 13C             |  |
| PI1  | 9.50 usec       |  |
| PL1  | -2.00 dB        |  |
| P11W | 58.52175522 W   |  |
| SFO1 | 100.6228298 MHz |  |

  

| NAME    | CHANNEL F2      |  |
|---------|-----------------|--|
| CPDPRG2 | waltz16         |  |
| NUC2    | 1H              |  |
| PCPD2   | 80.00 usec      |  |
| PI2     | 0.00 dB         |  |
| PL2     | 15.00 dB        |  |
| PL12    | 1.500 dB        |  |
| PL1W    | 11.88122272 W   |  |
| PL12W   | 0.3571125 W     |  |
| PL13W   | 400.1316005 MHz |  |
| SFO2    | 400.1316005 MHz |  |
| SI      | 32768           |  |
| SP      | 100.6127768 MHz |  |
| WTR     | EM              |  |
| SSB     | 0               |  |
| GB      | 1.00 Hz         |  |
| CB      | 0               |  |
| PC      | 1.40            |  |

# Elemental Composition Report

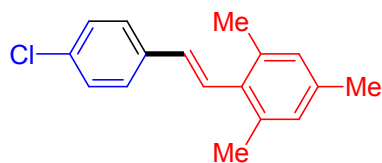

Page 1

## Single Mass Analysis

Tolerance = 5.0 PPM / DBE: min = -1.5, max = 50.0

Selected filters: None

Table 3, compound 3fv

Monoisotopic Mass, Odd and Even Electron Ions

2 formula(e) evaluated with 1 results within limits (up to 50 best isotopic matches for each mass)

Elements Used:

C: 2-17 H: 0-17 Cl: 0-1

Kin-Dept-08022012 GCT S14 192 (3.200) Cm (192-201)

TOF MS EI+ 256.1018

4.70e4

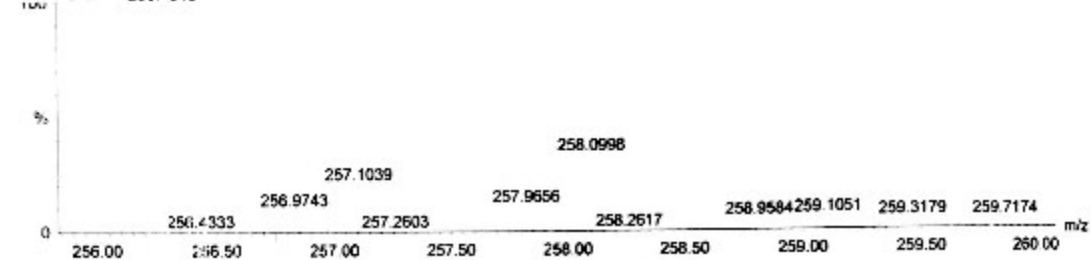

Minimum:

Maximum:

5.0

5.0

-1.5

50.0

Mass

Calc. Mass

mDa

PPM

DBE

i-FIT

Formula

256.1018

256.1019

-0.1

-0.4

9.0

41.7

C17 H17 Cl

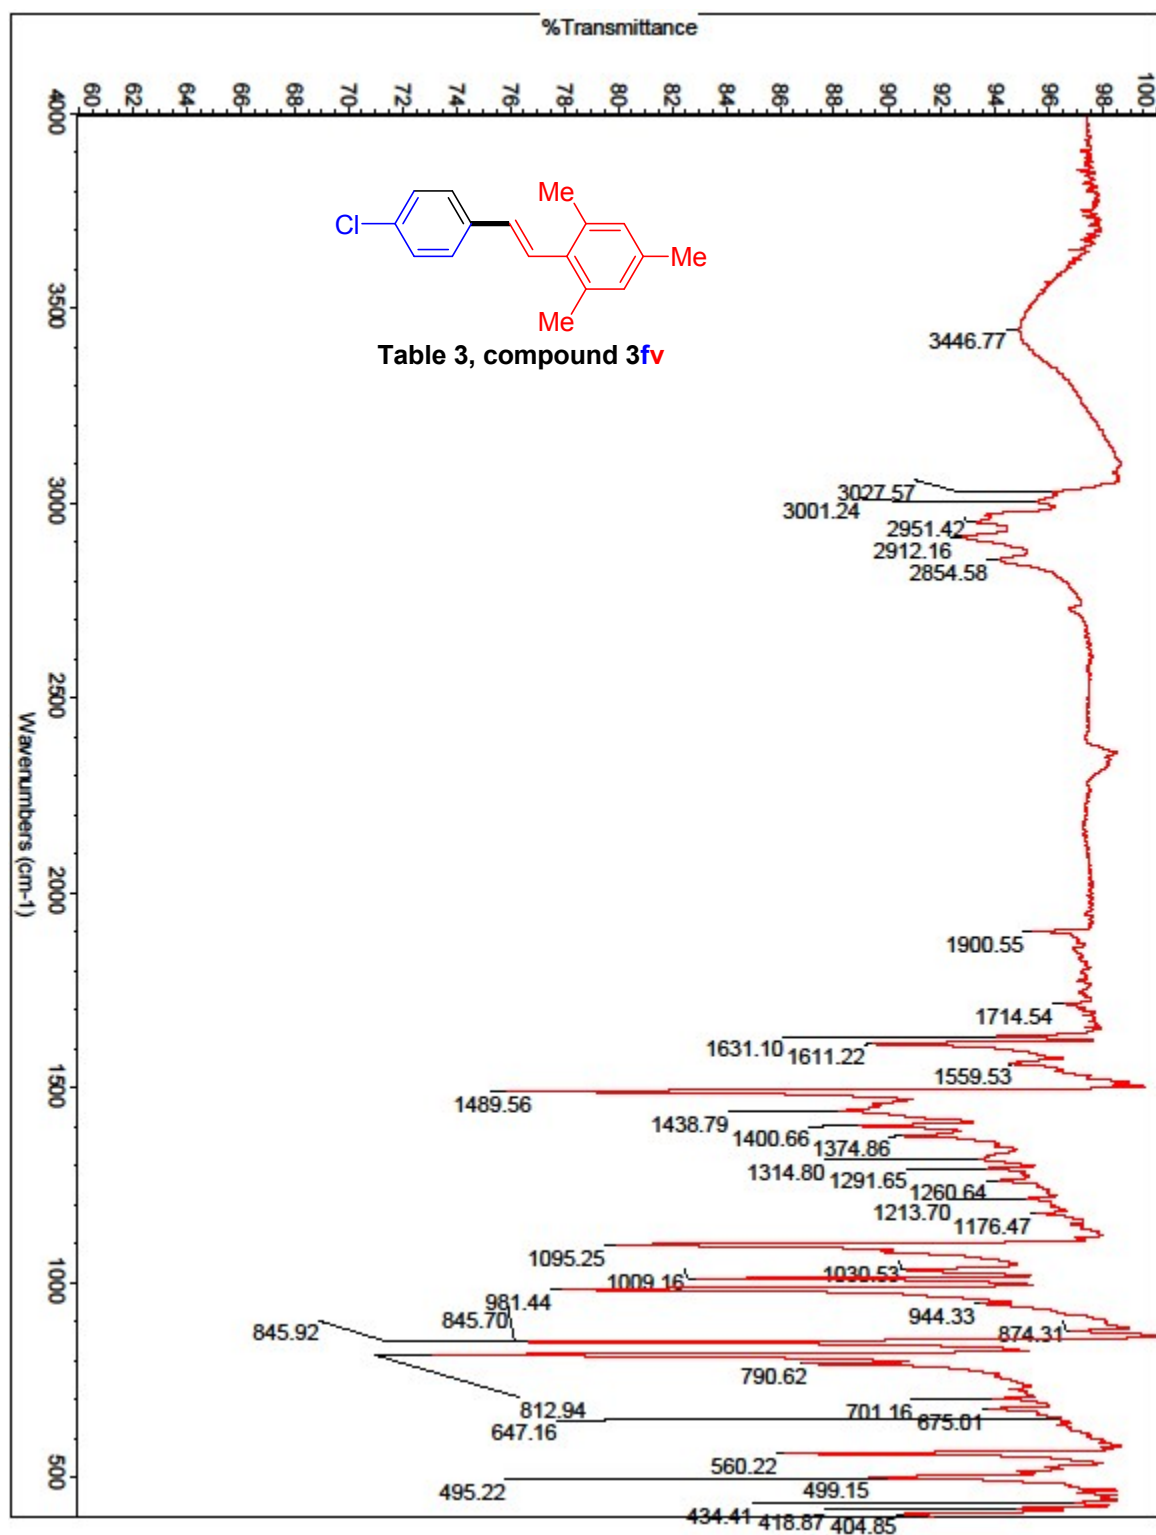

## 9. References

---

- (1) A. G. Myers, B. Zheng and M. Movassaghi, *J. Org. Chem.*, 1997, **62**, 7507.
- (2) H. Lee, J. H. Lee, S. Kang, J. Y. Lee, G. John, and J. H. Jung, *Chem. Commun.*, 2011, **47**, 2937.
- (3) F. -L. Yang, X. -T. Ma and S. -K. Tian, *Chem. Eur. J.*, 2012, **18**, 1582.
- (4) Y. -G. Zhang, X. -L. Liu, Z. -Y. He, X. -M. Li, H. -J. Kang and S. -K. Tian, *Chem. Eur. J.*, 2014, **20**, 2765.
- (5) G. -W. Wang and T. Miao, *Chem. Eur. J.*, 2011, **17**, 5787.
- (6) Y. -H. Su, Z. Wu and S. -K. Tian, *Chem. Commun.*, 2013, **49**, 6528.
- (7) S. Nadri, E. Rafiee, S. Jamali and M. Joshaghani, *Synlett*, 2015, **25**, 619.
- (8) X. Liu, X. Zhao and M. Lu, *J. Organomet. Chem.*, 2014, 23.
- (9) Z. Chen, M. Luo, Y. Wen, G. Luo and L. Liu, *Org. Lett.*, 2014, **16**, 3020.
- (10) M. K. Yilmaz and B. Güzel, *Appl. Organometal. Chem.*, 2014, **28**, 529.
